# Supplementary material for: Cost-effectiveness and quality of life in surgeon versus general practitioner-organised colon cancer surveillance: a randomised controlled trial
Source: PubMed Central journal article supplement — BMJ Open. 2013 Apr 4;3(4):e002391. doi: 10.1136/bmjopen-2012-002391 (PMC3641467; doi:10.1136/bmjopen-2012-002391), 2013-04-04
Supplement: bmjopen-2012-002391.draft_revisions.pdf [file bmjopen-2012-002391.draft_revisions.pdf]

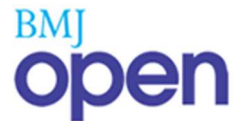

**General practitioner organised follow-up after curative colon cancer resection is not inferior to surgeon organised follow-up. A randomised controlled trial.**

|                                 |                                                                                                                                                                                                                                                                                                                                                                                                                                                                                                                                                                                                                                                                                                                                                                     |
|---------------------------------|---------------------------------------------------------------------------------------------------------------------------------------------------------------------------------------------------------------------------------------------------------------------------------------------------------------------------------------------------------------------------------------------------------------------------------------------------------------------------------------------------------------------------------------------------------------------------------------------------------------------------------------------------------------------------------------------------------------------------------------------------------------------|
| Journal:                        | <i>BMJ Open</i>                                                                                                                                                                                                                                                                                                                                                                                                                                                                                                                                                                                                                                                                                                                                                     |
| Manuscript ID:                  | bmjopen-2012-002391                                                                                                                                                                                                                                                                                                                                                                                                                                                                                                                                                                                                                                                                                                                                                 |
| Article Type:                   | Research                                                                                                                                                                                                                                                                                                                                                                                                                                                                                                                                                                                                                                                                                                                                                            |
| Date Submitted by the Author:   | 22-Nov-2012                                                                                                                                                                                                                                                                                                                                                                                                                                                                                                                                                                                                                                                                                                                                                         |
| Complete List of Authors:       | Augestad, Knut Magne; University Hospital of North Norway, Norwegian National Center of Integrated Care and Telemedicine<br>Norum, Jan; Northern Norway Regional Health Authority trust,<br>Dehof, Stefan; Helgeland Hospital, Mo i Rana, Department of Surgery<br>Aspevik, Ranveig; Helgeland Hospital, Mo i Rana, Department of Surgery<br>Ringberg, Unni; Nordbyen Primary Care Office,<br>Nestvold, Torunn; Nordland Hospital Trust, Bodø, Department of Surgery<br>Vonen, Barthold; Nordland Hospital Trust, Bodø, Department of Surgery<br>Skrøvseth, Stein; University Hospital North Norway, Norwegian National Center of Integrated Care and Telemedicine<br>Lindsetmo, Rolv-Ole; University Hospital North Norway, Department of Gastrointestinal Surgery |
| <b>Primary Subject Heading</b>: | Oncology                                                                                                                                                                                                                                                                                                                                                                                                                                                                                                                                                                                                                                                                                                                                                            |
| Secondary Subject Heading:      | Health services research, Surgery, Evidence based practice, Health economics, Oncology                                                                                                                                                                                                                                                                                                                                                                                                                                                                                                                                                                                                                                                                              |
| Keywords:                       | colorectal cancer, follow-up, PRIMARY CARE, health service research, SURGERY, Organisation of health services < HEALTH SERVICES ADMINISTRATION & MANAGEMENT                                                                                                                                                                                                                                                                                                                                                                                                                                                                                                                                                                                                         |
|                                 |                                                                                                                                                                                                                                                                                                                                                                                                                                                                                                                                                                                                                                                                                                                                                                     |

SCHOLARONE™  
Manuscripts

1  
2  
3 **General practitioner organised follow-up after curative colon cancer resection is**  
4 **not inferior to surgeon organised follow-up. A randomised controlled trial.**

5  
6 Knut Magne Augestad, *leader health services research*<sup>1,2,7</sup>, Jan Norum, *professor in*  
7 *clinical oncology*<sup>3,7</sup>, Stefan Dehof, *consultant in general surgery*<sup>4</sup>, Ranveig Aspevik,  
8 *consultant in digestive surgery*<sup>4</sup>, Unni Ringberg, *general practitioner*<sup>5</sup>, Torunn Nestvold,  
9 *consultant in digestive surgery*<sup>6</sup>, Barthold Vonen, *chief medical executive officer*<sup>6,7</sup>, Stein  
10 Olav Skrøvseth, *senior scientist in statistics*<sup>1</sup>, Rolv-Ole Lindsetmo, *professor in digestive*  
11 *surgery*<sup>2,7</sup>.  
12  
13  
14  
15  
16  
17

18 <sup>1</sup> Norwegian National Center of Integrated Care and Telemedicine, University Hospital of  
19 North Norway, Tromsø, Norway.

20  
21 <sup>2</sup> Department of Gastrointestinal Surgery, University Hospital of North Norway, Tromsø,  
22 Norway.  
23

24 <sup>3</sup> Northern Norway Regional Health Authority trust, Bodø, Norway.

25 <sup>4</sup> Department of Surgery, Helgeland Hospital, Mo i Rana, Norway.

26 <sup>5</sup> Nordbyen Primary Care Office, Tromsø, Norway.

27 <sup>6</sup> Nordland Hospital Trust, Bodø, Norway.

28 <sup>7</sup> Institute of Clinical Medicine, Faculty of Health Sciences, University of Tromsø, Norway.  
29  
30  
31  
32  
33  
34  
35  
36  
37  
38  
39  
40  
41

42 Word count: 3650  
43  
44

45 **Correspondence to:**

46 Knut Magne Augestad, MD

47 Norwegian National Center of Integrated Care and Telemedicine

48 University Hospital of North Norway

49 9037 Breivika, Norway

50 Phone: 0047 97499442

51 e-mail: knut.magne.augestad@telemed.no  
52  
53  
54  
55  
56  
57  
58  
59  
60

## Abstract

**Objective:** To assess whether colon cancer follow-up can be organised by general practitioners (GPs) without decline in patient quality of life (QoL), increase in cost, or **increase in time to cancer diagnoses**, compared to hospital follow-up.

**Design:** Randomised controlled trial.

**Setting:** Northern Norway Health Authority Trust, 4 trusts, 11 hospitals and 88 local communities.

**Participants:** Patients surgically treated for colon cancer, hospital surgeons and community GPs.

**Intervention:** 24 month follow-up according to national guidelines at the community general practitioner office. **To ensure a high follow-up guideline adherence, a decision support tool for patients and GPs were used.**

**Main outcome measures:** Primary outcome were QoL, **measured by the global health scale of EORTC-QLQC30, and EQ-5D. Secondary outcomes were cost-effectiveness and time to cancer diagnoses.**

**Results:** 110 patients were randomised to intervention (n=55) or control (n=55), and followed by 78 GPs (**942 follow-up months**) and 70 surgeons (**942 follow-up months**), respectively. Compared to baseline, there was a significant improvement in postoperative QoL (p=0.003), but no differences between groups were revealed (mean difference at 1,3,6,9,12,15,18,21 and 24 month follow-up appointments): Global Health;  $\Delta - 2.23$ , p=0.20; EQ-5D index;  $\Delta - 0.10$ , p=0.48, EQ-5D VAS;  $\Delta - 1.1$ , p=0.44. There were no differences in time to recurrent cancer diagnosis (GP 35 days vs. surgeon 45 days, p=0.46), 14 recurrences were detected (GP 6 vs. surgeon 8) and 7 metastases surgeries performed (GP 3 vs. surgeon 4). The follow-up program initiated 1186 health care contacts (GP 678 vs. surgeon 508), 1105 diagnostic tests (GP 592 vs. surgeon 513) and 778 hospital travels (GP 250 vs. surgeon 528). GP organised follow-up was associated with societal cost savings (£8233 vs. £9889, p<0.001).

**Conclusion:** GP organised follow-up was associated with no decline in QoL, no increase in time to cancer diagnosis and with cost savings.

**Trial registration:** ClinicalTrials.gov identifier NCT00572143.

**Article summary:****Article focus:**

- Intensive follow-up after curative colon cancer resection is associated with improved overall survival of 5-10%.
- No international consensus exist regarding the detailed content of a follow-up program for colorectal cancer .
- Quality of life (QoL), cost-effectiveness and patient safety in a GP organised follow-up program is unknown.

**Key messages:**

- GP organised colon cancer follow-up is associated with no decline in QoL, no increase in time to recurrent cancer diagnosis, and significant cost savings.

**Strengths and limitations of this trial:**

- Intention to treat analyses with high adherence to the national follow-up program.
- First trial assessing cost-effectiveness of a GP organised colon cancer follow-up program.
- The trial was stopped after 1884 follow-up months due to no impact of the primary intervention on QoL.

**Background**

Colon cancer is the third most common cancer in the western world, and surgery is the only curative treatment. Around one-third of those resected will experience recurrent disease **with less than two years expected survival**.<sup>1,2</sup> Despite the generally poor outcomes among patients with recurrent disease, most patients treated with curative intent are included in some form of surveillance program involving periodic evaluation. Reviews comparing various follow-up programs have suggested that more intensive strategies tend to increase five-year survival by detecting relapse about six months earlier than less intensive strategies — at a point where the patient will be more likely to be considered a candidate for **potentially curative metastases surgery**.<sup>2-4</sup> However, wide consensus has not been reached regarding just what an intensive follow-up strategy should entail.<sup>5-8</sup> New surveillance trials in progress are not likely to fully settle the issue either.<sup>9-12</sup> What none of the available clinical recommendations for follow-up have addressed adequately is the *setting* where this follow-up should occur: conducted by specialists who originally treated the cancer at hospitals, or in the offices of local

1  
2  
3 general practitioners (GP's).<sup>2</sup> Increasingly, the benefits of greater involvement of  
4 primary care providers in the ongoing management of chronic illnesses are recognised.  
5  
6 <sup>13</sup> Level of follow-up care may greatly influence quality of life and costs, especially in  
7 rural areas with long distances to travel for hospital services. However, such  
8 considerations must be balanced against the imperative that colon cancer survivors  
9 receive the best care available. Recently, the UK's National Cancer Survivorship Initiative  
10 recognised the need to develop new models of cancer care that support patient self care,  
11 care planning and making the best out of resources.<sup>14</sup> In Norway, similar national  
12 initiatives have been launched. In this trial, we tested the main hypothesis that colon  
13 cancer patients followed-up by their GP would experience similar or higher scores on  
14 quality of life measures at a lower cost than alternative hospital controls. The other aims  
15 were to test for differences of harms and benefits in a follow-up program, i.e. rate of  
16 serious clinical events, rate of false positive tests, time to diagnosis of recurrence, and  
17 frequency of metastases surgery.

## 26 **Methods**

27  
28 This was a randomised controlled trial with institutional ethical approval and patient  
29 written consent carried out in North Norway Health Authority trust using a previously  
30 published protocol. <sup>15</sup> **The first patient was included 1<sup>st</sup> of June 2007, the last patient**  
31 **included 15<sup>th</sup> of December 2011. Patients were followed until June 2012.**

## 35 **Participating patients, hospitals, primary and secondary care professionals**

36  
37 Patients were eligible if they were aged less than 75 years and had recent surgery for  
38 colon cancer with Dukes' stage A, B or C. Patients receiving postsurgical adjuvant  
39 chemotherapy (some Dukes' B and all Dukes' C) were also eligible. Three local hospitals  
40 and one university hospital participated. Approximately 100 patients with colon cancer  
41 are surgically treated annually at these four hospitals. **All 550 GPs in the region received**  
42 **written information, 448 GPs consented to participate in the trial (figure 1).**

## 47 **Objective and hypotheses**

48  
49 The primary objective was to compare patients' quality of life and costs of follow-up by  
50 their local GP or at the surgical outpatient clinic. The primary hypothesis was that  
51 patients followed-up by their GP would experience similar or better QoL scores at a  
52 lower cost. The secondary objective was to test whether the incidence of serious clinical  
53 events (SCE) would be similar for patients followed-up by their GP or hospital specialist  
54  
55  
56  
57  
58  
59  
60

(control group), secondary hypothesis being that patients followed-up by their GP would have no delay in detection of relapse and the same frequency of SCEs as controls.

### **Description of intervention**

We defined this as a complex intervention, consisting of several interconnecting parts.<sup>16</sup> To ensure high follow-up guideline adherence by patients allocated to GP follow-up, we used a decision support tool as part of the intervention.<sup>17</sup> Thus, the intervention consisted of the following parts:

1. *GP organised colon cancer follow-up*: The patients were referred to their general practitioner for postoperative follow-up according to national guidelines (table 1). Information was given about surgery, any complications, Dukes' staging, time and location of chemotherapy (for Dukes' C patients), and risk of recurrence.
2. *Patient decision-support pamphlet*: **Received at the baseline consultation**, containing information about; a) Their own disease, tumour stage and risk of recurrence; b) The aim and objective of the trial; b) The current national follow-up guidelines, i.e. **schedule** and location of CEA measurements, chest x-ray, contrast enhanced liver ultrasound, colonoscopy and clinical examination; b) A detailed description of signs and symptoms of potential recurrence of colon cancer; c) In case of a serious clinical event between appointments, relevant phone numbers and contact information was given.
3. *GP decision-support pamphlet*: **Sent at time of baseline appointment to all GPs that had a patient allocated to their practice**. This pamphlet contained similar information as the patient received i.e. information about follow-up guidelines, signs and symptoms of recurrence and behavioural strategy in the case suspicion of a recurrence. In case of questions regarding the follow-up relevant contact information was given.

Patients allocated to GP follow-up could be referred back to any surgical clinic at any time during the study period. Similarly, patients in the hospital follow-up group (controls) were free to consult their GP at any time. National follow-up guidelines were applied in both study arms and patients were followed for up to two years. The follow-up period consisted of nine follow-up cycles with regular clinical examinations, CEA measurement, chest x ray, contrast enhanced liver ultrasound and colonoscopy (table 1).

Table 1. Norwegian Gastrointestinal Cancer Group (NGICG) 2007 follow-up program.

| Examination/test                          | Follow-up cycle (months postoperative) |   |   |   |    |    |    |    |    |    |    |    |    |    |    |
|-------------------------------------------|----------------------------------------|---|---|---|----|----|----|----|----|----|----|----|----|----|----|
|                                           | 1                                      | 3 | 6 | 9 | 12 | 15 | 18 | 21 | 24 | 30 | 36 | 42 | 48 | 54 | 60 |
| Chest x-ray                               |                                        |   | X |   | X  |    | X  |    | X  |    | X  |    | X  |    | X  |
| Contrast enhanced liver ultrasound (CEUS) |                                        |   | X |   | X  |    | X  |    | X  |    | X  |    | X  |    | X  |
| Colonoscopy                               |                                        |   |   |   | X  |    |    |    |    |    |    |    | X  |    |    |
| CEA measurement                           | X                                      | X | X | X | X  | X  | X  | X  | X  | X  | X  | X  | X  | X  | X  |
| Clinical examination                      | X                                      | X | X | X | X  | X  | X  | X  | X  | X  | X  | X  | X  | X  | X  |

Red: Length of trial participation (24 months, 9 follow-up cycles). CEA: carcinoembryonic antigen.

## Randomisation

At study entry, patients were seen for a baseline visit by a local trial investigator at the hospital where they received surgical treatment approximately 3-4 weeks postoperatively. At this visit, a clinical examination was performed and information about the histology and results of the surgery was shared with each patient. If the patients provided informed consent, they were randomised to follow-up either by their GP (intervention) or at the surgical outpatient clinic (controls) using a web-based randomisation service managed by the Norwegian University of Science and Technology ([www.ntnu.no](http://www.ntnu.no)). The randomisation ratio was 1:1, patients were stratified according to the Dukes' staging (A,B,C) and whether they had a stoma. The local trial investigator was not involved in the subsequent follow-up appointments in any way. Recruited patients were not informed about other patients recruited in the same trial. Similarly, no information regarding trial progress and allocation was revealed to participating GPs or surgeons. However, as GP organised follow-up represented a new practice, blinding was not possible in the intervention arm.

## Primary outcome measures

### *Quality of life*

QoL measurements were collected at baseline and 3,6,9,12,15,18,21 and 24 months. The European Organization for Research and Treatment of Cancer QoL Questionnaire (EORTC QLQ C-30): EORTC QLQ C-30 incorporates nine multi-item scales: five functional scales (physical, role, cognitive, emotional and social); three symptom scales (fatigue, pain, nausea/vomiting); and a global health status/QOL scale. Six single-item scales are

1  
2  
3 also included (dyspnoea, insomnia, appetite loss, constipation, diarrhoea and financial  
4 difficulties).<sup>18</sup> **Primary outcome measure in this trial was the global health status.**  
5  
6 *The EuroQol-5D (EQ-5D<sup>TM</sup>; EuroQol Group, Rotterdam, The Netherlands):* Is a  
7  
8 standardized generic instrument employed to measure of health outcome. EQ-5D  
9  
10 measures five dimensions of health-related QoL (HRQOL): mobility, self-care, usual  
11  
12 activities, pain/discomfort and anxiety/depression. Each dimension is rated at three  
13  
14 levels: no problems (1), some problems (2) and major problems (3).<sup>19</sup> Based on  
15  
16 preferences elicited from a general population, EQ-5D health states (e.g. 1-1-2-1-3) may  
17  
18 be converted into utility scores (= index scores, IS). In this trial we used preferences  
19  
20 elicited from a UK population, as no similar Norwegian preferences exist.<sup>20</sup>  
21  
22 EQ Visual Analogue Scale (EQ VAS) records the respondent's self-rated health status on  
23  
24 a vertically graduated (0-100) visual analogue scale.

### 23 **Secondary outcome measures**

#### 24 *Cost-effectiveness*

25  
26 Resources used (baseline to 24 months) were registered prospectively based on reports  
27  
28 by the patients and on hospital EMR review. The cost elements included costs related to  
29  
30 hospital visits, GP visits, laboratory tests, radiology examinations, colonoscopy,  
31  
32 examinations due to suspected relapse (radiology, colonoscopy, CT of thorax and/or  
33  
34 abdomen, PET scan), treatment of recurrence, travelling/transportation, production  
35  
36 losses, co-payments and other patient/family expenses.

#### 37 *Time to cancer diagnoses*

38  
39 **Time to cancer diagnoses was defined as the time from occurrence of a serious clinical**  
40  
41 **event (SCE, dated in the GP referral or hospital EMR record) until the date of diagnoses**  
42  
43 **of a cancer recurrence. A serious clinical event (SCEs) was defined as an episode were**  
44  
45 **cancer recurrence was suspected. A SCE can be triggered by either symptoms reported**  
46  
47 **(at follow-up or in between follow-up), clinical findings at follow-up or findings by**  
48  
49 **screening test.** A SCE was defined as: Cancer suspect lesion revealed at colonoscopy,  
50  
51 increase in CEA measurements shown by repeated measurements, blood in stool  
52  
53 detected by the Hemofec (FOB) test, unexplained abdominal pain, unexplained weight  
54  
55 loss of 5 kg during the last three months, cancer-suspect lesions detected by rectal  
56  
57 examination, palpable lymphadenopathy, metastatic suspect lesions shown by chest x-  
58  
59 occurrence of cancer related symptoms.  
60



### Data collection

At the baseline appointment, patients recruited received nine questionnaires (as part of the patient decision-support pamphlet) corresponding with the nine follow-up cycles (table 1). The questionnaires contained questions about QoL, patient satisfaction, and cost and resource utilisation. Questionnaires were returned by mail every three months by the patients to the trial centre until 24 months postoperatively. These questionnaires were optically readable, being consecutively registered in the trial database. A research assistant was responsible for data collection, database input and patient reminders when missing questionnaires. **The reminders were sent to participating patients when the questionnaires were 3 months overdue the estimated follow-up schedule. All questionnaires were dated and we could thus monitor trial progression.** In case of missing information about cost elements we either reviewed the hospital EMR, or performed telephone interview with participating surgeons, GPs or patients.

### Sample size calculation

In June 2007 sample size calculations were based on a significance level of 5% and power set at 80%, this indicated that we needed 136 patients to detect a 10 units QoL difference (i.e. a small to moderate improvement) on EORTC QLQ C-30 Global Health score with a standard deviation of 20. **Definition of “a small to moderate improvement on QoL” (i.e 10 units on the global health score), and standard deviation estimates of QoL (colon cancer patients with localised disease), were retrieved from previous published publications.<sup>21,22</sup>**

### Economic analysis

BMJ guidelines for economic analyses alongside randomised controlled trials were employed.<sup>23</sup> As the trial revealed no difference in quality of life, a cost-minimisation analysis was carried out. The economic evaluation had a societal perspective. A 3% discount rate was used to discount future costs and benefits. For this publication cost elements have been converted from Norwegian kroner (NOK) into British Pounds at the rate of GBP 1£ = NOK 9,39 NOK as of the Norwegian National Bank the 27<sup>th</sup> of June 2012. Details of the unit costs assigned to health care resource use are shown in table 2. A one-way sensitivity analysis was used to assess the robustness of the results and impact of variance. Societal cost of 24-month follow-up was assessed for low, base and high input values, and the result expressed as a many inputs, one output tornado chart. **To increase generalizability of cost between countries, unit costs from the UK were included in the**

**sensitivity analyses.** Cost for GP consultation and diagnostic testing, has been reported to be 30-40% higher than units cost applied in this trial and relevant cost elements were increased accordingly in sensitivity analyses.<sup>24</sup>

Table 2. Details of the unit costs assigned to health care resource use data.

| Variable                                       | Unit cost (£)*          | Sensitivity analyses |
|------------------------------------------------|-------------------------|----------------------|
| <b>Cost of travel</b>                          |                         | ± 25%                |
| Mean costs hospital travel                     | 88 <sup>a</sup>         |                      |
| Hotel overnight                                | 74 <sup>b</sup>         |                      |
| Private car rates                              | 0.2 per km <sup>c</sup> |                      |
| Parking                                        | 10.6 <sup>b</sup>       |                      |
| Taxi                                           | 1.3 per km <sup>c</sup> |                      |
| Bus                                            | 2.6 <sup>c</sup>        |                      |
| <b>Cost of GP consultation</b>                 |                         | ± 25- 40%            |
| GP consultation 20 min                         | 18.5 <sup>d</sup>       |                      |
| Phone consultation GP 10 min                   | 5.3 <sup>d</sup>        |                      |
| Emergency consultation GP 30 min               | 26 <sup>d</sup>         |                      |
| <b>Cost of surgeon outpatient consultation</b> |                         | ± 25-40%             |
| Surgeon outpatient consultation 30 min         | 69 <sup>e</sup>         |                      |
| Phone consultation surgeon 15 min              | 10.6 <sup>f</sup>       |                      |
| Emergency outpatient consultation 30 min       | 69 <sup>e</sup>         |                      |
| <b>Cost of follow-up tests</b>                 |                         | ± 25-40 %            |
| Blood samples                                  | 5 <sup>d</sup>          |                      |
| Chest-X-ray                                    | 25 <sup>g,h</sup>       |                      |
| Contrast enhanced ultrasound liver             | 153 <sup>g,h</sup>      |                      |
| CT abdomen                                     | 105 <sup>g,h</sup>      |                      |
| CT thorax                                      | 105 <sup>g,h</sup>      |                      |
| Colonoscopy                                    | 293 <sup>e,h</sup>      |                      |
| PET scan                                       | 2662 <sup>g</sup>       |                      |
| <b>Cost related to sick leave</b>              |                         | ± 25%                |
| Governmental reimbursement 1 day work absence  | 102 <sup>i</sup>        |                      |
| <b>Costs related to metastases surgery</b>     |                         | ± 25%                |
| Cost of abdominal surgery                      | 14176 <sup>e</sup>      |                      |
| Cost of liver surgery                          | 11596 <sup>e</sup>      |                      |
| Cost of lung surgery                           | 13061 <sup>e</sup>      |                      |

\* Exchange rate 29<sup>th</sup> of June 2012: 1 £ = 9.36 Norwegian Kroner:  
[www.dnb.no/en/currencylist?la=EN&site=DNB\\_NO](http://www.dnb.no/en/currencylist?la=EN&site=DNB_NO)

<sup>a</sup> Personal communication North Norwegian Health Administration (JN): 5 400 000 NOK budgeted annual travel expenses/950 000 annual patient travels = 88 £ per travel

<sup>b</sup> Local data.

<sup>c</sup> Norwegian National Bureau of Patient Travels: <http://www.pasientreiser.no/andre-spraak/english>.

<sup>d</sup> The Norwegian Medical Association: Norwegian Policy Document for Governmental Reimbursements in Primary Care (Fastlegetariffen) 2011: [www.legeforeningen.no/normaltariff/Fastlegetariff\\_2010.pdf](http://www.legeforeningen.no/normaltariff/Fastlegetariff_2010.pdf).  
*Cost of GP consultation:* 136 NOK (20 min consultation) + 386 NOK per patient annually. Assuming 10 consultations per patient annually = 38 NOK/consultation. In total 174 NOK per consultation = 18.5 £.

<sup>e</sup> Norwegian Health Authorities. Reimbursement and DRG weighting in Norwegian Hospitals 2012: <http://www.helsedirektoratet.no/publikasjoner/regelverk-innsatsstyrte-finansiering-2012/Sider/default.aspx>.

1  
2  
3 1 DRG weight: 38209 NOK. Surgeon outpatient consultation (day and night-time): DRG 923 O, weight 0.017.  
4 Colonoscopy: DRG 710 O, weight 0.072. Abdominal surgery: DRG 170, weight 3.484. Liver surgery: DRG 201,  
5 weight 2.850. Lung surgery: DRG 76, weight 3.21

6 <sup>f</sup>Statistics in Norway 2011: Average annual salary 750 000 NOK (80 000 £) hospital consultant.

7 <sup>g</sup>Cost rates Department of Radiology and Nuclear Medicine University Hospital North Norway.

8 <sup>h</sup>Korner H. Soreide K. Stokkeland PJ. Soreide JA. Systematic follow-up after curative surgery for colorectal  
9 cancer in Norway: a population-based audit of effectiveness, costs, and compliance. J Gastrointest Surg  
10 2005 Mar;9(3):320-8.

11 <sup>i</sup>Estimated from a median income of 350 000 NOK/year/patient as reported by patient subsample in  
12 regular work at time of surgery.

## 13 14 **Statistics**

15 Descriptive statistics were performed by percentages, 2x2 contingency tables, Chi  
16 Square, Fisher Exact test and t-test. The base case analyses (n=110, 600 complete  
17 follow-up questionnaires/cycles) were performed on intention to treat principle.  
18 Treatment arms were compared with respect to potential covariates using continuous  
19 and categorical univariable analyses. The main analyses examined whether differences  
20 in outcome between baseline, 3, 6, 9, 12, 15, 18, 21 and 24 months existed in all QoL  
21 outcome measures (EORTC QLQ C-30 and EQ-5D). A general linear model was  
22 employed, where time (1-24 months) and intervention group (GPs versus Surgeon) were  
23 predictors in analyses of variance (between groups ANOVA). **Missing items in a form  
24 were treated as missing. When missing forms, missing data were imputed by the last  
25 observation carried forward (LOCF).** Conditional power (CP) was defined as the chance  
26 of getting statistically significant results at the end of the trial given the data so far.<sup>25,26</sup>  
27 We defined a CP < 15% as a sufficient threshold to stop early.<sup>27</sup> Results were expressed  
28 as mean differences for continuous outcomes with corresponding standard deviations  
29 (SD), 95% confidence intervals, and associated p-values. P-values were reported with  
30 two decimal places with p-values less than 0.001 reported as p < 0.001. For all tests we  
31 used p = 0.05 level of significance. All analyses were performed with IBM SPSS Statistics  
32 v 19.0 (IBM Company SPSS 2010) and Microsoft Excel for Mac 2011.  
33  
34  
35  
36  
37  
38  
39  
40  
41  
42  
43  
44  
45  
46  
47  
48  
49  
50

## 51 **Results**

52 110 patients surgically treated for colon cancer met the inclusion criteria and agreed to  
53 participate (figure 2). The control and intervention group were matched at baseline for  
54 demographic and medical characteristics (table 3). During the follow-up period 628  
55 follow-up cycles (**i.e 1884 follow-up months; GP 942 months vs. surgeon 942 months**)  
56  
57  
58  
59  
60

were performed (GP 314 cycles vs. surgeon 314 cycles). 28 questionnaires (5%) were excluded from analyses (GP 15 vs. surgeon 13) due to incomplete data or missing information, i.e. 600 follow-up questionnaires (95%) (GP 299 vs. surgeon 301) were included in analyses. 84 patients (75%) (GP 41 vs. surgeon 44) were followed for 12 months, 58 patients (52%) (GP 29 vs. surgeon 29) were followed for 24 months. Eleven patients withdrew during trial due to no wish of follow-up (GP 5 vs. surgeon 6), 20 patients were transferred to a new follow-up program (GP 9 vs. surgeon 11). Implementation of new national colon cancer follow-up guidelines triggered an interim analysis in June 2012 (80% of pre planned recruitment).<sup>7</sup> There was at this point 4% probability (conditional power as defined in methods) of showing a significant result, which meant that further trial continuation were not justified.

Table 3. Baseline demographics and clinical characteristics.

| Variable                        | Surgeon (%)<br>n=55 | GP (%)<br>n=55 | Total (%)<br>n=110 | p value |
|---------------------------------|---------------------|----------------|--------------------|---------|
| <b>Age group</b>                |                     |                |                    |         |
| < 50                            | 2 (3.6)             | 6 (10.9)       | 7 (6.3)            | 0.10    |
| 50-59                           | 8 (14.5)            | 6 (10.9)       | 14 (12.7)          | 0.56    |
| 60-69                           | 23 (41.8)           | 24 (43.6)      | 47 (42.7)          | 0.84    |
| 70-75*                          | 22 (40.0)           | 19 (34.5)      | 41 (38.0)          | 0.55    |
| Mean age (SD)                   | 66.7 (7.3)          | 64.0 (8.7)     | 65.4 (8.1)         | 0.09    |
| <b>Gender</b>                   |                     |                |                    |         |
| Male                            | 32 (58.2)           | 33 (60.0)      | 65 (59.1)          | 0.84    |
| Female                          | 23 (41.8)           | 22 (40.0)      | 45 (40.9)          | 0.84    |
| <b>Education</b>                |                     |                |                    |         |
| Primary                         | 20 (36.3)           | 18 (32.7)      | 38 (34.5)          | 0.68    |
| Secondary                       | 21 (38.1)           | 25 (45.4)      | 46 (41.8)          | 0.49    |
| University < 4yrs               | 8 (14.5)            | 5 (9.0)        | 13 (11.8)          | 0.37    |
| University > 4 yrs              | 6 (10.9)            | 7 (12.7)       | 13 (11.8)          | 0.76    |
| <b>Income level</b>             |                     |                |                    |         |
| Median (£)                      | 32-42 000           | 32-42000       | 32-42000           |         |
| <b>Main activity</b>            |                     |                |                    |         |
| Employment                      | 12 (21.8)           | 17 (30.9)      | 29 (26.3)          | 0.27    |
| Home                            | 3 (5.4)             | 9 (16.3)       | 11 (10.0)          | 0.06    |
| Out of work                     | 0 (0)               | 1 (1.8)        | 1 (0.9)            |         |
| Pensioner                       | 40 (72.7)           | 28 (50.9)      | 68 (61.8)          | 0.01    |
| <b>Location of surgery</b>      |                     |                |                    |         |
| University hospital (n=1)       | 34 (61.8)           | 37 (67.3)      | 71 (64.5)          | 0.55    |
| Local hospital (n=3)            | 21 (38.1)           | 18 (32.7)      | 39 (35.4)          | 0.55    |
| <b>Clinical characteristics</b> |                     |                |                    |         |
| <b>Tumour location</b>          |                     |                |                    |         |
| Cøkum                           | 13 (23.6)           | 13 (23.6)      | 26 (23.6)          | 1.0     |
| Ascendens                       | 9 (16.3)            | 5 (9.1)        | 14 (12.7)          | 0.25    |

|                                  |           |           |           |      |
|----------------------------------|-----------|-----------|-----------|------|
| Transversum                      | 4 (7.2)   | 5 (9.1)   | 9 (8.1)   | 0.72 |
| Decedens                         | 1 (1.8)   | 4 (1.8)   | 5 (4.5)   | 0.15 |
| Sigmoid                          | 28 (50.9) | 28 (50.9) | 56 (50.9) | 1.0  |
| Elevated preoperative CEA        | 19 (34.5) | 23(41.8)  | 42(38.1)  | 0.55 |
| <b>Type of surgery</b>           |           |           |           |      |
| Laparoscopic surgery             | 14 (25.5) | 11 (20.0) | 25 (22.7) | 0.49 |
| Open surgery                     | 41 (74.5) | 44 (80.0) | 85 (77.3) | 0.49 |
| <b>Tumor stage</b>               |           |           |           |      |
| Dukes A                          | 12 (21.8) | 11 (20.0) | 24 (21.8) | 0.81 |
| Dukes B                          | 25 (45.5) | 30 (54.5) | 55 (50.0) | 0.34 |
| Dukes C                          | 18 (32.7) | 14 (25.5) | 32 (29.0) | 0.40 |
| New surgery due to complications | 6 (10.9)  | 9 (16.4)  | 15 (13.6) | 0.40 |
| Permanent stoma                  | 8 (14.5)  | 7 (12.7)  | 15 (13.6) | 0.78 |
| 6 months chemotherapy regime     | 18 (32.7) | 14 (25.5) | 32 (29.1) | 0.40 |

\* Patients < 75 years were included in survey. P values calculated with chi square, t test and fisher exact test when appropriate.

### Quality of life

There was no significant effect on the QoL main outcome measures. However, on the EORTC QLQ C-30 subscales, there were significant effects in favour of GP follow-up, *i.e.* role functioning ( $p=0.02$ ), emotional functioning ( $p= 0.01$ ) and pain ( $p=0,01$ ) (Table 4, Figure 3 A, B, C).

Table 4. Health related quality of life (ERTOC QLQ-C30 and EQ-5D) outcome variables and estimated differences.

| Outcome variable             | Mean (SD)   |             |             | Estimated mean difference<br>(95% CI) | p *  |
|------------------------------|-------------|-------------|-------------|---------------------------------------|------|
|                              | Baseline    | 12 months   | 24 months   |                                       |      |
| <b>Global health status</b>  |             |             |             |                                       |      |
| Surgeon                      | 70.7 (22.5) | 75.9 (19.2) | 85.0(16.8)  |                                       |      |
| GP                           | 70.4 (20.8) | 81.3 (17.0) | 86.5 (16.2) | - 2.23 (-5.7 - 1.2)                   | 0.20 |
| <b>Physical functioning</b>  |             |             |             |                                       |      |
| Surgeon                      | 80.5 (23.6) | 88.8 (15.0) | 88.0 (17.0) |                                       |      |
| GP                           | 74.5 (24.9) | 90.6 (16.6) | 93.3 (16.0) | - 2.4 (-5.7 - 0.8)                    | 0.14 |
| <b>Role functioning</b>      |             |             |             |                                       |      |
| Surgeon                      | 62.5 (37.3) | 83.8 (26.5) | 90.3 (18.6) |                                       |      |
| GP                           | 62.7 (37.5) | 91.6 (22.1) | 93.7 (20.7) | - 5.1 (-9.7 - (-0.5))                 | 0.02 |
| <b>Emotional functioning</b> |             |             |             |                                       |      |
| Surgeon                      | 87.4 (18.1) | 87.7 (16.1) | 87.7 (16.9) |                                       |      |
| GP                           | 85.8 (23.2) | 91.9 (15.8) | 94.4 (17.3) | - 3.7 (-6.8 - (-0.6))                 | 0.01 |
| <b>Cognitive functioning</b> |             |             |             |                                       |      |
| Surgeon                      | 87.0 (20.6) | 86.5 (22.8) | 90.3 (15.0) |                                       |      |
| GP                           | 72.4 (31.8) | 91.1 (17.0) | 93.0 (21.3) | -1.7 (- 5.0 - 1.4)                    | 0.27 |
| <b>Social functioning</b>    |             |             |             |                                       |      |
| Surgeon                      | 70.7 (30.5) | 87.0 (23.8) | 90.4 (15.6) |                                       |      |
| GP                           | 72.4 (31.8) | 91.6 (17.3) | 93.0 (21.3) | -4.2 (-8.4 - (-0.009))                | 0.04 |
| <b>Fatigue</b>               |             |             |             |                                       |      |
| Surgeon                      | 32.3 (26.1) | 19.2 (17.1) | 14.6 (23.4) |                                       |      |

|                               |             |             |             |                      |      |
|-------------------------------|-------------|-------------|-------------|----------------------|------|
| GP                            | 36.9 (28.0) | 22.2 (19.9) | 18.3 (20.8) | 0.24 (-3.7 - 4.2)    | 0.9  |
| <b>Nausea and vomiting</b>    |             |             |             |                      |      |
| Surgeon                       | 6.0 (12.4)  | 2.8 (8.5)   | 0.9 (3.9)   |                      |      |
| GP                            | 6.5 (14.1)  | 3.5 (9.9)   | 4.3 (10.3)  | -0.8 (-2.8 - 1.2)    | 0.4  |
| <b>Pain</b>                   |             |             |             |                      |      |
| Surgeon                       | 22.3 (26.6) | 11.1 (21.9) | 9.6 (16.9)  |                      |      |
| GP                            | 19.1 (28.2) | 9.3 (14.0)  | 2.8 (14.7)  | 4.5 (0.8 - 8.2)      | 0.01 |
| <b>Dyspnoea</b>               |             |             |             |                      |      |
| Surgeon                       | 18.1 (26.3) | 14.2 (20.2) | 10.5 (19.4) |                      |      |
| GP                            | 24.0 (32.7) | 12.1 (23.3) | 7.2 (21.2)  | 3.0 (-1.2 - 7.2)     | 0.1  |
| <b>Insomnia</b>               |             |             |             |                      |      |
| Surgeon                       | 22.9 (25.4) | 18.5 (25.7) | 17.5 (25.7) |                      |      |
| GP                            | 28.6 (34.5) | 14.7 (23.4) | 23.6 (25.0) | 2.9 (-1.7 - 7.5)     | 0.2  |
| <b>Appetite loss</b>          |             |             |             |                      |      |
| Surgeon                       | 15.5 (23.1) | 3.7 (10.6)  | 1.7 (7.6)   |                      |      |
| GP                            | 20.9 (31.7) | 1.9 (7.9)   | 4.1 (11.2)  | 0.8 (-2.9 - 3.9)     | 0.6  |
| <b>Constipation</b>           |             |             |             |                      |      |
| Surgeon                       | 27.4 (32.0) | 21.2 (29.9) | 10.5 (19.4) |                      |      |
| GP                            | 18.6 (33.5) | 7.8 (16.5)  | 15.2 (19.6) | 5.1 (0.8 - 9.4)      | 0.01 |
| <b>Diarrhoea</b>              |             |             |             |                      |      |
| Surgeon                       | 24.4 (29.6) | 21.2 (25.3) | 24.5 (24.4) |                      |      |
| GP                            | 31.0 (33.6) | 22.5 (26.8) | 23.6 (28.6) | -1.0 (-5.7 - 3.5)    | 0.6  |
| <b>Financial difficulties</b> |             |             |             |                      |      |
| Surgeon                       | 9.8 (26.2)  | 9.2 (20.4)  | 7.0 (21.0)  |                      |      |
| GP                            | 6.9 (21.2)  | 1.9 (7.9)   | 4.1 (11.2)  | 2.7 (-0.4 - 5.8)     | 0.08 |
| <b>EQ-5D Index score</b>      |             |             |             |                      |      |
| Surgeon                       | 0.83 (0.16) | 0.85 (0.20) | 0.90 (0.14) |                      |      |
| GP                            | 0.79 (0.22) | 0.87 (0.18) | 0.89 (0.13) | -0.10 (-0.039-0.018) | 0.48 |
| <b>EQ-5D VAS score</b>        |             |             |             |                      |      |
| Surgeon                       | 72.2 (18.9) | 78.2 (16.2) | 82.4 (16.6) |                      |      |
| GP                            | 67.4 (17.4) | 79.0 (14.6) | 83.5 (14.8) | -1.10 (-3.9-1.7)     | 0.44 |

\* Adjusted general linear model from 1800 follow-up months.

### Cost-effectiveness

There were no significant difference on primary QoL measure (Global health status), and a cost minimisation analyses were performed. A total of 778 travels (consultations, radiological investigations, colonoscopy) to hospital were registered, 528 in the surgeon group and 250 in the GP group, respectively. A total of 1186 health-care contacts (regular appointments, emergency appointments, phone consultations) were registered, 678 in the GP group versus 508 in the surgeon group (table 5). Mean cost of follow-up per patient per follow-up cycle was £292 in GP group and £351 in surgeon group ( $p=0.02$ ) (figure 4). Overall mean societal cost per patient for 24 months follow-up were £ 9889 in the surgeon group and £ 8233 in the GP group ( $p<0.001$ , table 6).

Table 5. Resource use in a colon cancer follow-up program.

| Cost variable | Surgeon | GP | Total |
|---------------|---------|----|-------|
|---------------|---------|----|-------|

|                                    | n=55             |             |                | n=55             |             |                 | n=110            |             |                |
|------------------------------------|------------------|-------------|----------------|------------------|-------------|-----------------|------------------|-------------|----------------|
|                                    | n                | n/<br>cycle | cost/<br>cycle | n                | n/<br>cycle | cost/<br>cycle  | n                | n/<br>cycle | cost/cycle     |
| <b>Follow-up months</b>            | 903              |             |                | 897              |             |                 | 1800             |             |                |
| <b>Hospital travels</b>            |                  |             |                |                  |             |                 |                  |             |                |
| Car                                | 189              | 0.62        | a              | 113              | 0.37        | a               | 302              | 0.50        | a              |
| Taxi                               | 37               | 0.12        |                | 22               | 0.07        |                 | 59               | 0.09        |                |
| Bus                                | 96               | 0.31        |                | 33               | 0.11        |                 | 129              | 0.21        |                |
| Airplane                           | 0                | 0           |                | 8                | 0.02        |                 | 8                | 0.01        |                |
| Express boat                       | 43               | 0.14        |                | 12               | 0.04        |                 | 55               | 0.09        |                |
| Extra travel due to poor logistics | 104              | 0.34        |                | 52               | 0.17        |                 | 156              | 0.26        |                |
| Travel assistant                   | 59               | 0.19        |                | 10               | 0.03        |                 | 69               | 0.11        |                |
| Hotel                              | 7                | 0.02        | 1.7<br>(11)    | 8                | 0.02        | 2.0<br>(12)     | 15               | 0.02        | 1.8<br>(11.6)  |
| Total                              | 528 <sup>a</sup> | 1.75        |                | 250 <sup>a</sup> | 0.83        |                 | 778 <sup>a</sup> | 1.29        |                |
| Mean cost                          |                  |             | 156.9          |                  |             | 76.7 (160.1,    |                  |             | 117.1          |
| £ (SD)                             |                  |             | {145.0}        |                  |             | p<0.001)        |                  |             | {157.7}        |
| <b>GP office travels</b>           |                  |             |                |                  |             |                 |                  |             |                |
| Car                                | 155              | 0.51        | b              | 317              | 1.06        | b               | 472              | 0.78        | b              |
| Taxi                               | 7                | 0.02        |                | 14               | 0.05        |                 | 21               | 0.03        |                |
| Bus                                | 17               | 0.06        |                | 35               | 0.12        |                 | 52               | 0.08        |                |
| Travel assistant                   | 0                | 0           |                | 15               | 0.05        |                 | 15               | 0.02        |                |
| Total                              | 179              | 0.59        |                | 381              | 1.27        |                 | 560              | 0.93        |                |
| Mean cost                          |                  |             | 4.1            |                  |             | 9.0 (9.1,       |                  |             | 6.6            |
| £ (SD)                             |                  |             | {7.9}          |                  |             | p<0.001)        |                  |             | {8.9}          |
| <b>Out of pocket expenses</b>      |                  |             |                |                  |             |                 |                  |             |                |
| Mean cost                          |                  |             | 2.7            |                  |             | 4.3 (15.0,      |                  |             | 3.5 (11.9)     |
| £ (SD)                             |                  |             | {7.7}          |                  |             | p=0.10)         |                  |             |                |
| <b>Health care contacts</b>        |                  |             |                |                  |             |                 |                  |             |                |
| GP consultations                   | 156              | 0.52        | 9.6 (17.8)     | 329              | 1.10        | 20.6<br>(19.9)  | 485              | 0.80        | 15.1<br>(19.6) |
| GP phone consultation              | 61               | 0.20        | 1.0<br>(3.9)   | 94               | 0.31        | 1.7<br>(4.3)    | 155              | 0.25        | 1.4<br>(4.1)   |
| GP emergency consultations         | 23               | 0.08        | 1.9 (12.2)     | 37               | 0.12        | 3.2<br>(14.4)   | 60               | 0.1         | 2.6<br>(13.3)  |
| Surgeon outpatient consultations   | 227              | 0.75        | 52.3<br>(93.8) | 185              | 0.61        | 43.3<br>(104.1) | 412              | 0.68        | 47.8<br>(99.0) |
| Surgeon phone consultations        | 41               | 0.14        | 1.45<br>(5.7)  | 33               | 0.11        | 1.2<br>(4.4)    | 74               | 0.12        | 1.32<br>(5.1)  |
| Total                              | 508              | 1.68        |                | 678              | 2.26        |                 | 1186             | 1.97        |                |
| Mean cost                          |                  |             | 66.4           |                  |             | 70.1 (112.2,    |                  |             | 68.2           |
| £ (SD)                             |                  |             | {100.1}        |                  |             | p=0.67)         |                  |             | {106.1}        |
| <b>NGICG follow-up tests</b>       |                  |             |                |                  |             |                 |                  |             |                |
| Blood samples                      | 203              | 0.67        | 3.3            | 300              | 1.0         | 5.1             | 503              | 0.83        | 4.2            |

|                                |       |      |          |           |      |               |       |      |          |
|--------------------------------|-------|------|----------|-----------|------|---------------|-------|------|----------|
|                                |       |      | (5.1)    |           |      | (6.8)         |       |      | (6.0)    |
| Chest x ray                    | 150   | 0.50 | 12.2     | 128       | 0.43 | 10.6          | 278   | 0.46 | 11.4     |
|                                |       |      | (12.2)   |           |      | (12.1)        |       |      | (12.2)   |
| CEUS                           | 110   | 0.37 | 56.2     | 99        | 0.33 | 51            | 209   | 0.34 | 53.8     |
|                                |       |      | (74.0)   |           |      | (72.5)        |       |      | (73.2)   |
| Colonoscopy                    | 50    | 0.17 | 49.2     | 65        | 0.22 | 65.1          | 115   | 0.19 | 57.1     |
|                                |       |      | (110.3)  |           |      | (122)         |       |      | (116.7)  |
| Total                          | 513   | 1.70 |          | 592       | 1.97 |               | 1105  | 1.84 |          |
| Mean cost                      |       |      | 121.1    |           |      | 132.2 (166.7, |       |      | 126.6    |
| £ (SD)                         |       |      | (152.8)  |           |      | p=0.39)       |       |      | (159.8)  |
| <b>Work loss</b>               |       |      |          |           |      |               |       |      |          |
| Patients in paid work (n)      | 17    |      |          | 12        |      |               | 29    |      |          |
| Days off work mean (SD)        | 215   |      |          | 198 (190, |      |               | 208   |      |          |
|                                | (168) |      |          | p=0.79)   |      |               | (219) |      |          |
| <sup>c</sup> Mean cost         |       |      | 2440     |           |      | 1884 (2092,   |       |      | 2086     |
| £ (SD)                         |       |      | (1906)   |           |      | p=0.45)       |       |      | (2014)   |
| <b>Serious clinical events</b> |       |      |          |           |      |               |       |      |          |
| Number of events               | 22    |      |          | 26        |      |               | 48    |      |          |
| <sup>d</sup> Mean cost         |       |      | 261.6    |           |      | 573.1 (838.9, |       |      | 444.0    |
| £ (SD)                         |       |      | (157.7)  |           |      | p=0.14)       |       |      | (662.4)  |
| <b>Metastases surgeries</b>    |       |      |          |           |      |               |       |      |          |
| Cancer recurrences             | 8     |      |          | 6         |      |               | 14    |      |          |
| Metastases surgeries           | 4     |      |          | 3         |      |               | 7     |      |          |
| <sup>e</sup> Mean cost         |       |      | 9037.2   |           |      | 13316.0       |       |      | 10871.0  |
| £ (SD)                         |       |      | (5117.5) |           |      | (1489.0,      |       |      | (4366.3) |
|                                |       |      |          |           |      | p=0.22)       |       |      |          |

<sup>a</sup> Mean travel cost for hospital travels, see table 2. <sup>b</sup> Values calculated with a median distance GP office 30 km. <sup>c</sup> Value represent the mean cost (standard deviation) relating to the subsample who were in paid work at time of surgical treatment. NGICG: Norwegian Gastrointestinal Cancer Group. Follow-up cycle = 3 months. CEUS: Contrast enhanced liver ultrasound. <sup>d</sup> Value represent the mean cost (standard deviation) of work up tests (CEA, chest x-ray, relating to the subsample who experienced a serious clinical event. <sup>e</sup> Value represent the mean cost (standard deviation) relating to the subsample who performed metastases surgery.



Table 6. Cost of colon cancer follow-up

| Cost Variable                              | Surgeon<br>n=55 | GP<br>n=55    | Total<br>n=110 | p value |
|--------------------------------------------|-----------------|---------------|----------------|---------|
| Healthcare cost per follow-up cycle £ (SD) | 351 (324)       | 292 (332.9)   | 324.1 (330.0)  | 0.02    |
| Healthcare cost 24 month follow-up £ (SD)  | 3178 (2917)     | 2651 (3004)   | 2917(2970)     | 0.03    |
| Societal cost per follow-up cycle £ (SD)   | 1098 (324)      | 914 (332)     | 1007 (340)     | < 0.001 |
| Societal cost 24 month follow-up £ (SD)    | 9889 (2917)     | 8233 (2996.1) | 9068 (3068.2)  | < 0.001 |

In estimation of health care and societal cost cycles with complete cost data (n=600 i.e. 1800 follow-up months) were included in analyses (as defined in table 1). Cost data from 28 follow-up cycles were excluded from analyses (incomplete or missing). Cost of sick leave was adjusted for baseline characteristic. Cost of serious clinical events and metastases surgeries were adjusted for the percentage of events. Fu: follow-up.

### *Sensitivity analyses*

The single factor with greatest impact on overall societal costs was sick-leave followed by cost of follow-up tests and cost of hospital travels. Variances in cost related to GP office travels and follow-up appointments had minor impact on overall cost in a follow-up program (figure 5).

### *Time to cancer diagnoses*

48 serious clinical events (SCE) occurred, mean time until diagnosis of a serious clinical event was 45 days in the surgeon group and 35 days in the GP group (p=0.46). Of patients with SCE, 14 patients had cancer recurrence and 7 patients (50%) were offered metastases surgery. Median time to diagnoses of recurrence was 21 days in the GP group (range 2-270 days) and 30 days in the surgeon group (range 3-45 days) (table 7). Five patients died (all deaths caused by disseminated colon cancer) during the follow-up period (GP 1 vs. surgeon 4).

Table 7. Clinical presentation of colon cancer recurrence by trial group

| Case no              | Sex | Presenting problem                                                                  | Routine/interval | Diagnostic tests                         | Metastatic site                 | Time to diagnoses (days) | Metastases surgery | Time to surgery (days) |
|----------------------|-----|-------------------------------------------------------------------------------------|------------------|------------------------------------------|---------------------------------|--------------------------|--------------------|------------------------|
| <b>GP group</b>      |     |                                                                                     |                  |                                          |                                 |                          |                    |                        |
| 1                    | F   | Elevated CEA                                                                        | routine          | CEUS<br>PET CT                           | Disseminated                    | 27                       | no                 | inoperable             |
| 2                    | M   | Abdominal pain                                                                      | interval         | CEUS                                     | Liver                           | 21                       | no                 | inoperable             |
| 3                    | M   | Elevated CEA                                                                        | routine          | CEA<br>CT thorax<br>CT abdomen           | Disseminated                    | 71                       | no                 | inoperable             |
| 4                    | M   | Metastatic lesion detected at CEUS                                                  | routine          | CEUS<br>CT thorax<br>CT abdomen          | Liver                           | 4                        | yes                | 38                     |
| 5                    | F   | Abdominal pain, normal CEA, CT and CEUS, disseminated cancer detected at laparotomy | interval         | CEUS<br>CT thorax<br>CT abdomen          | Disseminated                    | 270                      | yes                | 270                    |
| 6                    | M   | Abdominal tenderness                                                                | interval         | Anorectoscopy<br>Ct thorax<br>CT abdomen | Local recurrence                | 2                        | yes                | 30                     |
| <b>Surgeon group</b> |     |                                                                                     |                  |                                          |                                 |                          |                    |                        |
| 7                    | M   | Metastatic lesion detected chest x-ray                                              | routine          | CT thorax<br>CT abdomen                  | Lung                            | 45                       | yes                | 62                     |
| 8                    | M   | Stoma bleeding                                                                      | interval         | Colonoscopy<br>CT thorax<br>CT abdomen   | Local and lymph node recurrence | 10                       | no                 | inoperable             |
| 9                    | M   | Weight loss<br>Night sweating                                                       | routine          | CT Thorax<br>CT abdomen                  | Lung                            | 45                       | no                 | inoperable             |
| 10                   | M   | Metastatic lesion detected at chest-x ray                                           | routine          | CT Thorax<br>CT abdomen                  | Lung                            | 4                        | yes                | 42                     |
| 11                   | M   | Metastatic lesion detected CEUS                                                     | routine          | MR liver<br>CT thorax<br>CT abdomen      | Liver                           | 3                        | yes                | 43                     |
| 12                   | F   | Abdominal pain                                                                      | interval         | CT abdomen<br>CT thorax                  | Disseminated                    | 16                       | no                 | inoperable             |
| 13                   | M   | Elevated CEA                                                                        | routine          | CT thorax<br>CT abdomen<br>CT liver      | Liver<br>Lung                   | 30                       | no                 | inoperable             |
| 14                   | F   | Occult blood in faeces                                                              | interval         | CT thorax<br>CT abdomen<br>CEUS          | Liver                           | 31                       | yes                | 35                     |

## Discussion

### Summary of findings

A representative population of patients surgically treated for colon cancer participated in this trial, with an expected normal variance of demographic factors and colon cancer severity. In this study patients were followed for up to two years, i.e. the period with most cancer recurrences and serious clinical events, which again would impact QoL and costs of follow-up. We have shown that a decentralised colon cancer follow-up program will not impair QoL, on the contrary we observed a significant improvement in the following QoL subscales; role functioning, emotional functioning and pain. This is the first trial evaluating the economical implications of a GP organised follow-up program after curative resection for colon cancer. Despite a higher frequency of health care contacts in primary care, a decentralised GP organised follow-up program was associated with total cost savings due to decreased cost of primary care consultations and less hospital travels. Importantly, our result shows that GP follow-up was not associated with increased time to diagnosis of a cancer recurrence (35 versus 45 days,  $p=0.46$ ), and the frequency of a SCE was similar in both groups.

### Comparison with existing literature and on going trials

Although intensive follow-up is associated with improved survival, there are still international controversies on how to best organise follow-up of colon cancer patients. These controversies are mirrored in the wide variation of national follow-up guidelines.<sup>4-7</sup> Two systematic reviews, comparing follow-up trials have been published.<sup>2,3</sup> Due to the variation in the follow-up programs included in these reviews, it is not possible to infer the best combination of consultations, blood tests, colonoscopy, radiological investigations and level of care to maximise the outcomes.<sup>2</sup> Large randomised trials are under way (COLOFOL, GILDA, FACS) but results are most likely years away.<sup>9-11</sup> Few published surveys have evaluated the effect of a GP organised follow-up program. Two surveys have reported on quality of life in a primary care based follow-up program, and a single cost-effectiveness analysis of intensified hospital based follow-up was published in 2004.<sup>28-30</sup> However, for other cancer conditions more cost-effective ways of organising follow-up is extensively described and evaluated. For breast cancer patients, nurse lead telephone and GP organised follow-up is cost-effective<sup>31,32 33</sup> with no

1  
2  
3 increase in the frequency of SCE.<sup>34</sup> Nevertheless, the quality of primary care cancer  
4 management is still debated.<sup>35-37</sup>

### 6 **Strengths and limitations**

7  
8 Our trial has several strengths. Firstly, this is the first randomised trial addressing the  
9 economical implications and time to recurrent cancer diagnoses in a GP organised colon  
10 cancer follow-up program. We have shown that GP organised follow-up, even with  
11 increased frequency of health care contacts, was associated with cost savings and no  
12 decline in quality of life. Secondly, poor guideline compliance has been shown to  
13 represent a problem in cancer follow-up programs.<sup>38</sup> However, tools to support  
14 decision making in cancer are on way forward. In this study, a decision support  
15 pamphlet was part of the intervention and the patient and the GP organising the follow-  
16 up received a decision support tool. Detailed instructions of forthcoming follow-up  
17 consultations and test were given. We believe this decision support tool contributed to a  
18 **high follow-up guideline adherence** (table 6, GP 592 tests vs. surgeon 513 tests). Thirdly,  
19 we have shown that the rate of SCE and time to diagnosis of cancer recurrence is  
20 comparable between groups. In our opinion, this is an indicator of adequate quality in a  
21 GP organised follow-up program.

22  
23  
24  
25  
26  
27  
28  
29  
30  
31  
32 There exist some limitations. Firstly, **it might be argued that we were missing important**  
33 **information by choosing another endpoint than survival.** However, this trial was  
34 designed primarily to evaluate whether general practice follow-up results in effect on  
35 patient specific quality of life and cost effectiveness. We acknowledge that this choice of  
36 endpoint might impact the observed frequency of serious clinical events and time to  
37 cancer diagnoses, as a higher number of SCE and cancer recurrences would have  
38 occurred with a longer follow-up time. Nevertheless, during our trial length of 1884  
39 follow-up months we observed fewer recurrences than anticipated (15,4%), however  
40 this might be related to the decreasing rate of colon cancer recurrences at a national  
41 level (unpublished data Cancer Registry of Norway). Similarly, costs will be impacted by  
42 a longer follow-up time. However, when health care cost of follow-up is analysed  
43 separately (table 5, figure 3), cost spending are significantly lower in the GP group  
44 compared to the surgeon group. Secondly, **generalisability and** cost transferability  
45 across jurisdictions might be challenging, as elements of cost data may vary from place  
46 to place.<sup>39</sup> **It might be argued that this is a single country trial with limited**  
47 **generalizability. However, we do not think this is the case.** Comparable follow-up trials  
48  
49  
50  
51  
52  
53  
54  
55  
56  
57  
58  
59  
60

1  
2  
3 have been performed in countries like USA, Canada, UK, Australia, Netherlands.<sup>28,33,34,40</sup>  
4 These surveys are commonly cited and thus accepted as generalizable. In Norway, the  
5 GP has a traditional gatekeeper function and plays a central role managing resource use  
6 in secondary care. **Similarly**, many European countries have a health care organisation  
7 where the GP plays a central role as gatekeeper to access of secondary health care  
8 service. In our trial, guidelines for dealing with aspects of generalizability and  
9 transferability were applied, and variations in units costs were included in the  
10 sensitivity analyses (see figure 4).<sup>39</sup> **Finally, the trial was stopped after 1884 follow-up**  
11 **months due to no significant effect of the intervention on Global health score and**  
12 **implementation of a new national follow-up program. This might be a potential**  
13 **limitation. However, it would have been unethical to spend large resources over years to**  
14 **complete a trial with a 4% probability of proving the primary hypotheses.**

### 23 **Implication for patients, decision makers and clinicians**

24  
25 Colon cancer in numbers is the third largest cancer type worldwide and a considerable  
26 number of patients are enrolled in a post surgical surveillance program, resulting in  
27 significant societal cost. However, as there is no evidence based consensus of how to  
28 design cost-effective follow-up programs, differences in tests, test frequency and level of  
29 care will have high impact on societal cost spending. For many patients, follow-up leads  
30 to a number of long distance travels to hospital, causing high societal cost. Thus, from an  
31 economical perspective, GP organised follow-up is cost-effective due to a better  
32 coordination of care. In a time with escalating health care cost, especially in cancer care,  
33 these aspects are of increasing importance. From a patient perspective, GP organised  
34 follow-up is associated with high quality of care. Our study demonstrates that a  
35 decentralised follow-up has no negative impact on quality of life, length to cancer  
36 diagnoses and follow-up guideline adherence. Finally, patients surgically treated often  
37 have other chronic illnesses, and there is a trend towards higher involvement of primary  
38 care in treating these conditions as described in the chronic care model.<sup>13</sup> From a  
39 hospital perspective, a transfer of follow-up programs to primary care have economical  
40 and organisational implications. GP organised follow-up may be an effective way of  
41 reducing the burden on busy hospital clinics.

### 54 **Conclusion**

55 The present study suggests that colon cancer follow-up can safely be performed by GPs,  
56 with no negative impact on quality of life and to a lower cost. However, solid evidence is  
57  
58  
59  
60

1  
2  
3 missing regarding the optimal follow-up program that maximise survival. **We believe**  
4 **new methods of comparative effectiveness research in combination with emerging data**  
5 **from randomised trials must be used to settle these controversies.** <sup>41</sup>  
6  
7

### 8 **Contribution**

9  
10 KMA and ROL conceived and designed the research idea, and were responsible for the  
11 overall administration and direction of the study, the analysis and interpretation of data.  
12  
13 KMA and SOS designed the statistical analyses. KMA did the statistical analyses. KMA did  
14 the economic analysis with assistance from JN, who contributed to the design, data  
15 analysis, and interpretation of the findings. TN, RA and SD helped with patient  
16 recruitment and randomization, and to do the trial and interpreted the findings. UR  
17 advised on the trial protocol, unit cost and reimbursement practice in primary care. BV  
18 advised on protocol writing and pre trial sample size calculations and manuscript  
19 revision. KMA wrote the first draft. All authors read and approved the final manuscript.  
20  
21 KMA had full access to all the data in the study and had final responsibility for the  
22 decision to submit for publication.  
23  
24  
25  
26  
27

### 28 **Competing interest**

29  
30 All authors have completed the ICMJE uniform disclosure form at  
31 [www.icmje.org/coi\\_disclosure.pdf](http://www.icmje.org/coi_disclosure.pdf) (available on request from the corresponding author)  
32 and declare: The study was funded by a research grant from Northern Norwegian Health  
33 Authorities. The authors declare that they have no conflicts of interest.  
34  
35  
36

### 37 **Acknowledgements**

38 We thank Trine Hansen at Norwegian Centre for Integrated Care and Telemedicine for  
39 administrative support and for maintaining the research database. We thank professor  
40 Roar Johnsen, Department of Public Health and General Practice, Norwegian University  
41 of Science and Technology, for assistance in protocol writing and design of trial. We  
42 thank professor Lars Vatten, Department of Epidemiology, Norwegian University of  
43 Science and Technology for assistance in prestudy sample size calculations. We thank  
44 Johnie Rose, MD, PhD, Department of Family Medicine and Community Health, Case  
45 Western Reserve University, for valuable comments on our research and manuscript.  
46  
47 We thank Dr Caroline Sagatun (Surgical Department, Bodø Regional Hospital), Dr  
48 Henriette Fagertun (Surgical Department, Harstad Hospital), for comments on the study  
49 protocol and identification of potential trial participants. We thank Frank Hauboff  
50 (Surgical Outpatient Clinic, University Hospital of North Norway) for assistance in  
51  
52  
53  
54  
55  
56  
57  
58  
59  
60

1  
2  
3 randomisation and identification of potential trial participants. We thank Berit Marianne  
4 Bjelkåsen, Norwegian University of Science and Technology, for assistance with the web  
5 based randomisation service.  
6  
7

### 8 **Data sharing**

9 No additional data available.

### 10 **Copyright for authors**

11 The Corresponding Author has the right to grant on behalf of all authors and does grant  
12 on behalf of all authors, a worldwide licence to the Publishers and its licensees in  
13 perpetuity, in all forms, formats and media (whether known now or created in the  
14 future), to i) publish, reproduce, distribute, display and store the Contribution, ii)  
15 translate the Contribution into other languages, create adaptations, reprints, include  
16 within collections and create summaries, extracts and/or, abstracts of the Contribution,  
17 iii) create any other derivative work(s) based on the Contribution, iv) to exploit all  
18 subsidiary rights in the Contribution, v) the inclusion of electronic links from the  
19 Contribution to third party material where-ever it may be located; and, vi) licence any  
20 third party to do any or all of the above.  
21  
22  
23  
24  
25  
26  
27  
28  
29

### 30 **References**

- 31  
32 1 Larsen IK, editor. Cancer in Norway 2009. *Cancer Registry of Norway* 2011: 1–169.  
33  
34 2 Jeffery M. Follow-up strategies for patients treated for non-metastatic colorectal  
35 cancer. *The Cochrane Collaboration* 2007: 1–31.  
36  
37 3 Tjandra JJ, Chan MKY. Follow-Up After Curative Resection of Colorectal Cancer: A  
38 Meta-Analysis. *Dis Colon Rectum* 2007; **50**: 1783–99.  
39  
40 4 Figueredo A, Rumble RB, Maroun J, *et al*. Follow-up of patients with curatively  
41 resected colorectal cancer: a practice guideline. *BMC Cancer* 2003; **3**: 26.  
42  
43 5 Scholefield J, editor. Guidelines for the Management of Colorectal Cancer. *The*  
44 *Association of Coloproctology of Great Britain and Ireland* 2007; **3**: 1–117.  
45  
46 6 Bülow S, editor. Retningslinier for diagnostik og behandling af kolorektal cancer  
47 (Danish Guidelines). *Danish Colorectal Cancer Group* 2009; **4**: 1–176.  
48  
49 7 Vonen B, editor. Nasjonalt handlingsprogram med retningslinjer for diagnostikk,  
50 behandling og oppfølging av kreft i tynntarm og endetarm (Norwegian Guidelines).  
51 *Norwegian Ministry of Health* 2010: 1–162.  
52  
53 8 Engstrom PF, editor. NCCN Clinical Practice Guidelines in Oncology Colon Cancer  
54 V.2.2009. *National Comprehensive Cancer network* 2009; **2**: 1–71.  
55  
56 9 Follow-Up Study of Patients Who Have Undergone Surgery for Stage I, Stage II, or  
57  
58  
59  
60

- 1  
2  
3 Stage III Colorectal Cancer. *clinicaltrials.gov*. 2009; : 1–4.  
4  
5 10 Grossmann EM, Johnson FE, Virgo KS, Longo WE, Fossati R. Follow-up of colorectal  
6 cancer patients after resection with curative intent—the GILDA trial. *Surgical*  
7 *Oncology* 2004; **13**: 119–24.  
8  
9 11 Wille-Jørgensen P, Laurberg S, Carriquiry L, *et al*. An interim analysis of recruitment  
10 to the COLOFOL trial. *Colorect Dis* 2009; **11**: 756–8.  
11  
12 12 Wille-Jørgensen P, Balleby L. Follow-up in colorectal cancer: questions to be  
13 answered. *Colorect Dis* 2011; **13**: 959–60.  
14  
15 13 Bodenheimer T, Wagner EH, Grumbach K. Improving primary care for patients with  
16 chronic illness. *JAMA: The Journal of the American Medical Association* 2002; **288**:  
17 1775–9.  
18  
19 14 National Cancer Survivor Initiative. *Department of Health, Macmillan Cancer*  
20 *Support and NHS Improvement, London, UK* 2010: 1–82.  
21  
22 15 Augestad KM, Vonen B, Aspevik R, *et al*. Should the surgeon or the general  
23 practitioner (GP) follow up patients after surgery for colon cancer? A randomized  
24 controlled trial protocol focusing on quality of life, cost-effectiveness and serious  
25 clinical events. *BMC Health Serv Res* 2008; **8**: 137.  
26  
27 16 Campbell NC. Designing and evaluating complex interventions to improve health  
28 care. *BMJ* 2007: 1–5.  
29  
30 17 Kawamoto K. Improving clinical practice using clinical decision support systems: a  
31 systematic review of trials to identify features critical to success. *BMJ* 2005; **330**:  
32 765–0.  
33  
34 18 Sprangers MA, Cull A, Bjordal K, Groenvold M, Aaronson NK. The European  
35 Organization for Research and Treatment of Cancer. Approach to quality of life  
36 assessment: guidelines for developing questionnaire modules. EORTC Study Group  
37 on Quality of Life. *Qual Life Res* 1993; **2**: 287–95.  
38  
39 19 Dolan P. Modeling valuations for EuroQol health states. *Med Care* 1997; **35**: 1095–  
40 108.  
41  
42 20 Dolan P. The Time Trade-off method: Results from a general population study.  
43 *Health Economics* 2006; **5**: 1–14.  
44  
45 21 Cambell M. Estimating sample sizes for binary, ordered categorical, and continuous  
46 outcomes in two group comparisons. *BMJ* 1995; **311**: 1145–7.  
47  
48 22 King M. The interpretation of scores from the EORTC quality of life questionnaire  
49 QLQ-C30. *Quality of Life Research* 2004; **5**: 555–67.  
50  
51 23 Drummond M. Guidelines for authors and peer reviewers of economic submissions  
52 to the BMJ. *BMJ* 1996; **313**: 275–83.  
53  
54  
55  
56  
57  
58  
59  
60



- 1  
2  
3 24 Hill JC, Whitehurst DGT, Lewis M, *et al*. Comparison of stratified primary care  
4 management for low back pain with current best practice (STarT Back): a  
5 randomised controlled trial. *Lancet* 2011; **378**: 1560–71.  
6  
7 25 Lachin JM. Futility interim monitoring with control of type I and II error  
8 probabilities using the interim Z-value or confidence limit. *Clin Trials* 2009; **6**: 565–  
9 73.  
10  
11 26 Lachin JM. A review of methods for futility stopping based on conditional power.  
12 *Statist Med* 2005; **24**: 2747–64.  
13  
14 27 Jitlal M, Khan I, Lee SM, Hackshaw A. Stopping clinical trials early for futility:  
15 retrospective analysis of several randomised clinical studies. *Br J Cancer* 2012; **107**:  
16 910–7.  
17  
18 28 Wattchow DA, Weller DP, Esterman A, *et al*. General practice vs surgical-based  
19 follow-up for patients with colon cancer: randomised controlled trial. *Br J Cancer*  
20 2006; **94**: 1116–21.  
21  
22 29 Renehan AG, O'Dwyer ST, Whynes DK. Cost effectiveness analysis of intensive  
23 versus conventional follow up after curative resection for colorectal cancer. *BMJ*  
24 2004; **328**: 1–5.  
25  
26 30 Gall CA, Weller D, Esterman A, *et al*. Patient Satisfaction and Health-Related Quality  
27 of Life After Treatment for Colon Cancer. *Dis Colon Rectum* 2007; **50**: 801–9.  
28  
29 31 Beaver K, Hollingworth W, McDonald R, *et al*. Economic evaluation of a randomized  
30 clinical trial of hospital versus telephone follow-up after treatment for breast  
31 cancer. *Br J Surg* 2009; **96**: 1406–15.  
32  
33 32 Grunfeld E. Follow-up of breast cancer in primary care vs specialist care: results of  
34 an economic evaluation. *Br J Cancer* 1999; **79**: 1227–33.  
35  
36 33 Kimman ML, Dirksen CD, Voogd AC, *et al*. Economic evaluation of four follow-up  
37 strategies after curative treatment for breast cancer: Results of an RCT. *European*  
38 *Journal of Cancer* 2011; **47**: 1175–85.  
39  
40 34 Grunfeld E. Randomized Trial of Long-Term Follow-Up for Early-Stage Breast  
41 Cancer: A Comparison of Family Physician Versus Specialist Care. *Journal of Clinical*  
42 *Oncology* 2006; **24**: 848–55.  
43  
44 35 Editorial. Cancer detection and primary care.....revisited. *Lancet Oncology* 2012;  
45 **13**: 559.  
46  
47 36 Rubin G, Lyratzopoulos G, Abel G, Neal R, Walter F, Hamilton W. Cancer detection in  
48 primary care. *Lancet Oncology* 2012; **13**: e325–6.  
49  
50 37 Lyratzopoulos G, Neal RD, Barbiere JM, Rubin GP. Variation in number of general  
51 practitioner consultations before hospital referral for cancer: findings from the  
52 2010 National Cancer Patient Experience Survey in England. *The Lancet Oncology*  
53 2012; **13**: 353–65.  
54  
55  
56  
57  
58  
59  
60

- 1  
2  
3 38 Cooper GS, Kou TD, Reynolds H. Receipt of guideline-recommended follow-up in  
4 older colorectal cancer survivors. *Cancer* 2008; **113**: 2029–37.  
5  
6 39 Drummond M, Barbieri M, Cook J, *et al.* Transferability of Economic Evaluations  
7 Across Jurisdictions: ISPOR Good Research Practices Task Force Report. *Value in*  
8 *Health* 2009; **12**: 409–18.  
9  
10 40 Grunfeld E. Routine followup of breastcancer in primary care: randomised trial. *BMJ*  
11 1996; : 1–5.  
12  
13 41 Smith RA. Mathematical models and cost-effective screening strategies for  
14 colorectal cancer. *Canadian Medical Association Journal* 2010; **182**: 1283–4.  
15  
16  
17  
18  
19  
20  
21  
22  
23  
24

25  
26 **Figure legends:**  
27  
28

29  
30 **Figure 1.** Participating trial hospitals and communities.

31 Three hospital trusts and the University Hospital of North Norway trust are located within the Northern-  
32 Norwegian Health Region, serving a population of 470 000. Median travel time with car from primary care  
33 communities to hospital were 2 hours. Two patients were randomised to follow up at their GP located in  
34 Longyear City, Spitsbergen (not shown on map), 2 hours flight from the university hospital.  
35  
36

37  
38 **Figure 2.** Flow of participants.

39 Patients were enrolled in the 2007 NGICG (Norwegian Gastrointestinal Cancer Group, table 1) follow-up  
40 program in both trial arms. The program are divided in 3 months cycles i.e.; clinical examination at 1  
41 (baseline), 3,6,9,12,15,18,21 and 24 months, carcinoembryonic antigen (CEA) measurement at 3 months  
42 intervals, chest x-ray and contrast enhanced liver ultrasound every 6 months, and colonoscopy 1 time  
43 during 24 months (table 1).  
44  
45  
46  
47

48  
49 **Figure 3 A, B, C.** Health related quality of life 1-24 postoperative month.

50 EORTC QLQ C30 Global Health, EQ-5D index score and EQ-5D visual analog scale.  
51  
52

53  
54 **Figure 4.** Cost of follow-up.

55 Mean cost of follow-up per patient per 3 month follow-up cycle with error bars (95% confidence  
56 intervals). In a general linear model, mean difference between groups was 60.0 £ (95 CI interval: 7.0 –  
57 113.0, p = 0.02).  
58  
59  
60

1  
2  
3  
4  
5  
6  
7  
8  
9  
10  
11  
12  
13  
14  
15  
16  
17  
18  
19  
20  
21  
22  
23  
24  
25  
26  
27  
28  
29  
30  
31  
32  
33  
34  
35  
36  
37  
38  
39  
40  
41  
42  
43  
44  
45  
46  
47  
48  
49  
50  
51  
52  
53  
54  
55  
56  
57  
58  
59  
60

**Figure 5.** Sensitivity analyses.

Societal cost per patient (£) for 24-month colon cancer follow-up. Most critical variable in terms of impact is listed at the top of the graph, and the rest ranked according to their impact thereafter. As unit cost from the UK, like cost for GP consultation and diagnostic testing, has been reported to be 30-40% higher than units cost applied in this trial, relevant cost elements were increased accordingly. Cost values for serious clinical events, metastases surgeries and sick leave were adjusted for baseline characteristics.

For peer review only

1  
2  
3  
4  
5  
6  
7  
8  
9  
10  
11  
12  
13  
14  
15  
16  
17  
18  
19  
20  
21  
22  
23  
24  
25  
26  
27  
28  
29  
30  
31  
32  
33  
34  
35  
36  
37  
38  
39  
40  
41  
42  
43  
44  
45

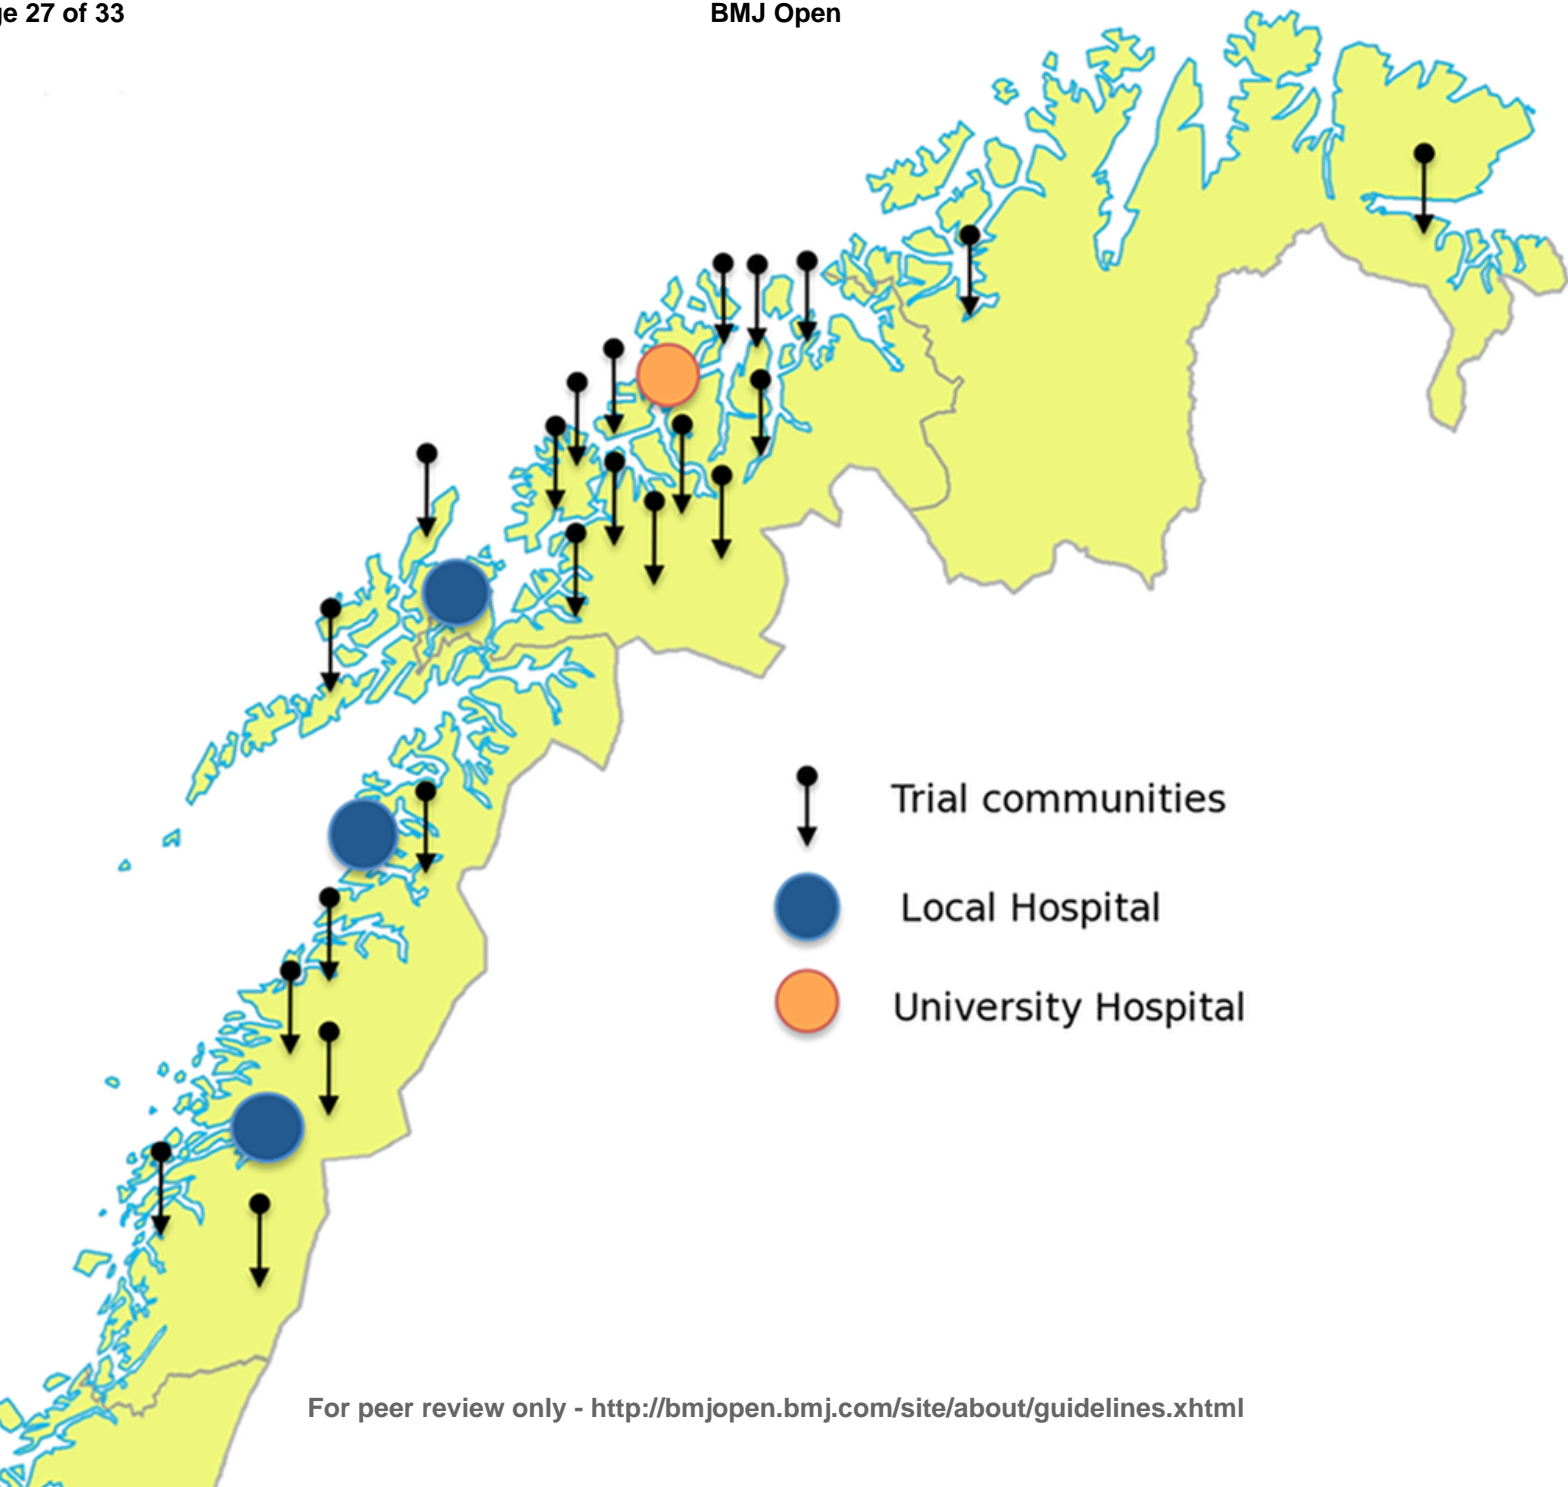

**Trial Flow Diagram**

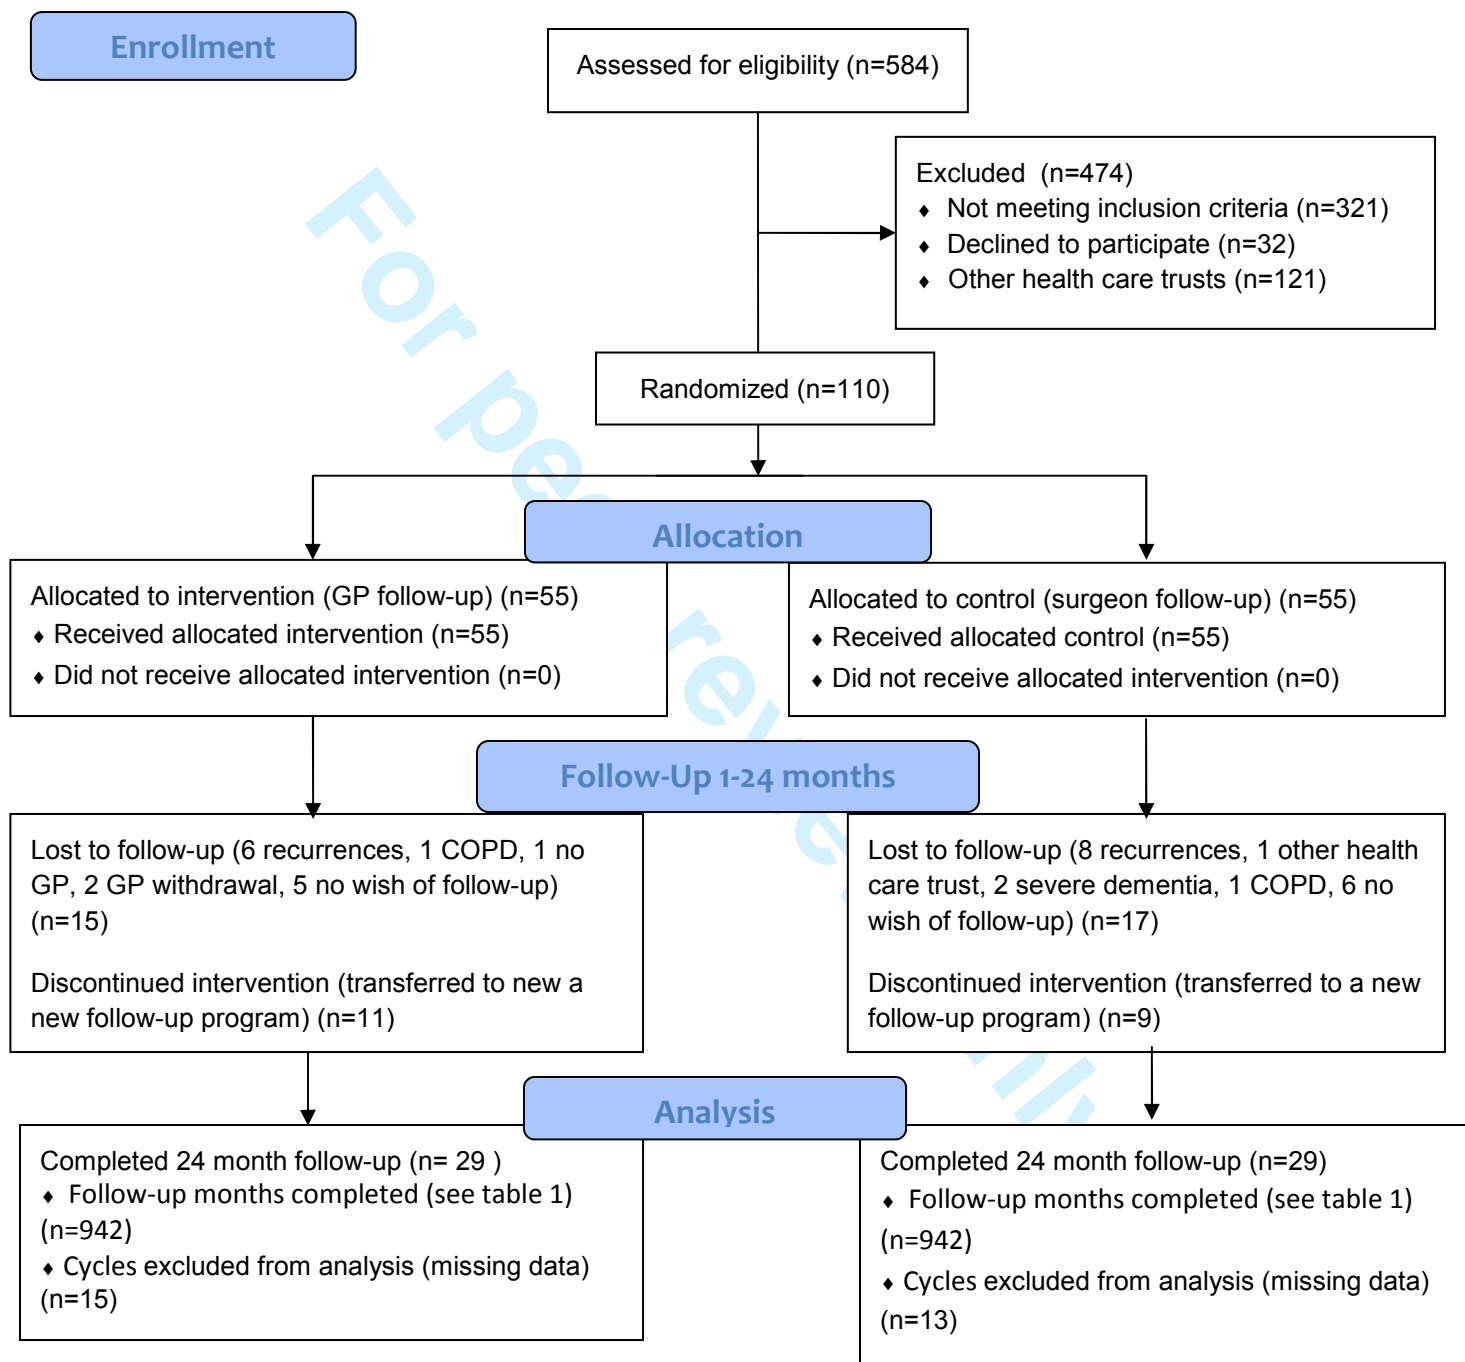

1  
2  
3  
4  
5  
6  
7  
8  
9  
10  
11  
12  
13  
14  
15  
16  
17  
18  
19  
20  
21  
22  
23  
24  
25  
26  
27  
28  
29  
30  
31  
32  
33  
34  
35  
36  
37  
38  
39  
40  
41  
42  
43  
44  
45  
46  
47  
48  
49  
50  
51  
52  
53  
54  
55  
56  
57  
58  
59  
60

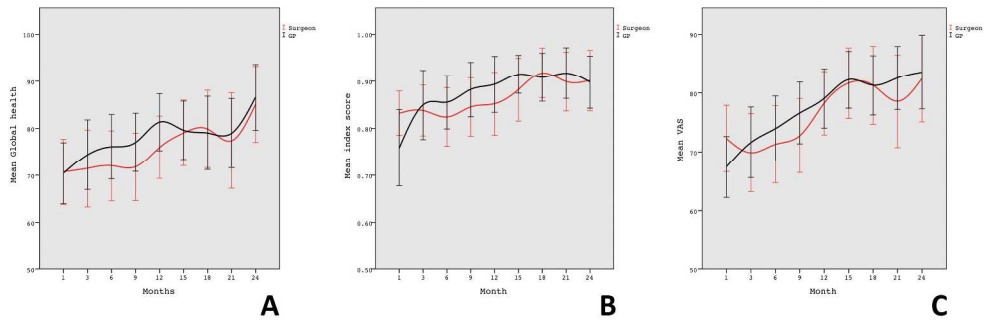

Health related quality of life 1-24 postoperative month.  
EORTC QLQ C30 Global Health (A), EQ-5D index score (B) and EQ-5D visual analog scale (C).  
444x150mm (150 x 150 DPI)

peer review only

1  
2  
3  
4  
5  
6  
7  
8  
9  
10  
11  
12  
13  
14  
15  
16  
17  
18  
19  
20  
21  
22  
23  
24  
25  
26  
27  
28  
29  
30  
31  
32  
33  
34  
35  
36  
37  
38  
39  
40  
41  
42  
43  
44  
45  
46  
47  
48  
49  
50  
51  
52  
53  
54  
55  
56  
57  
58  
59  
60

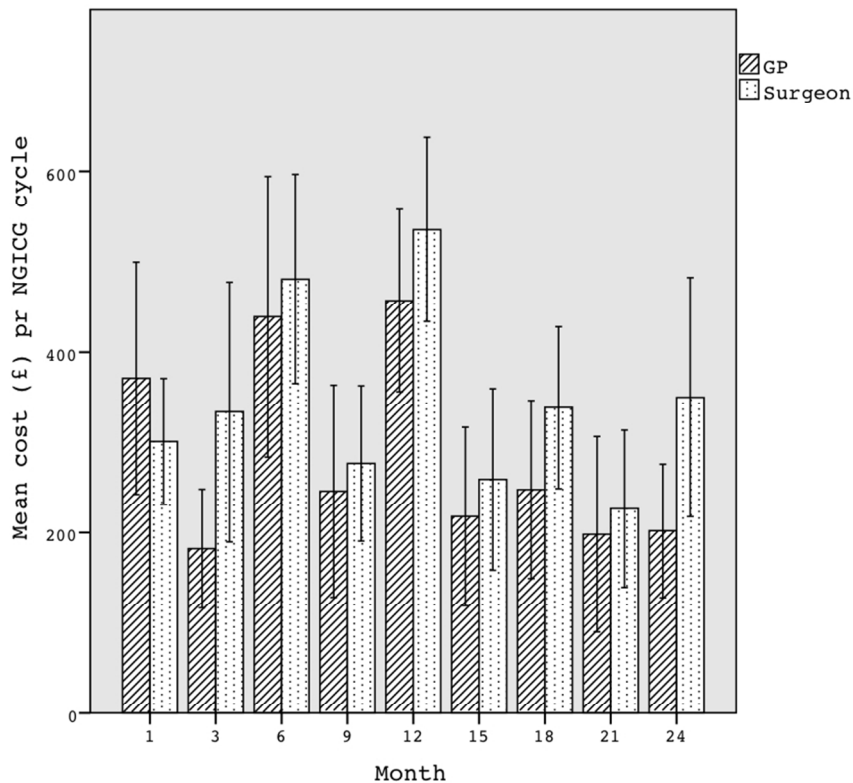

Cost of follow-up.

Mean cost of follow-up per patient per 3 month follow-up cycle with error bars (95% confidence intervals).  
 In a general linear model, mean difference between groups was 60.0 £ (95 CI interval: 7.0 – 113.0, p = 0.02).

165x132mm (150 x 150 DPI)

only

1  
2  
3  
4  
5  
6  
7  
8  
9  
10  
11  
12  
13  
14  
15  
16  
17  
18  
19  
20  
21  
22  
23  
24  
25  
26  
27  
28  
29  
30  
31  
32  
33  
34  
35  
36  
37  
38  
39  
40  
41  
42  
43  
44  
45  
46  
47  
48  
49  
50  
51  
52  
53  
54  
55  
56  
57  
58  
59  
60

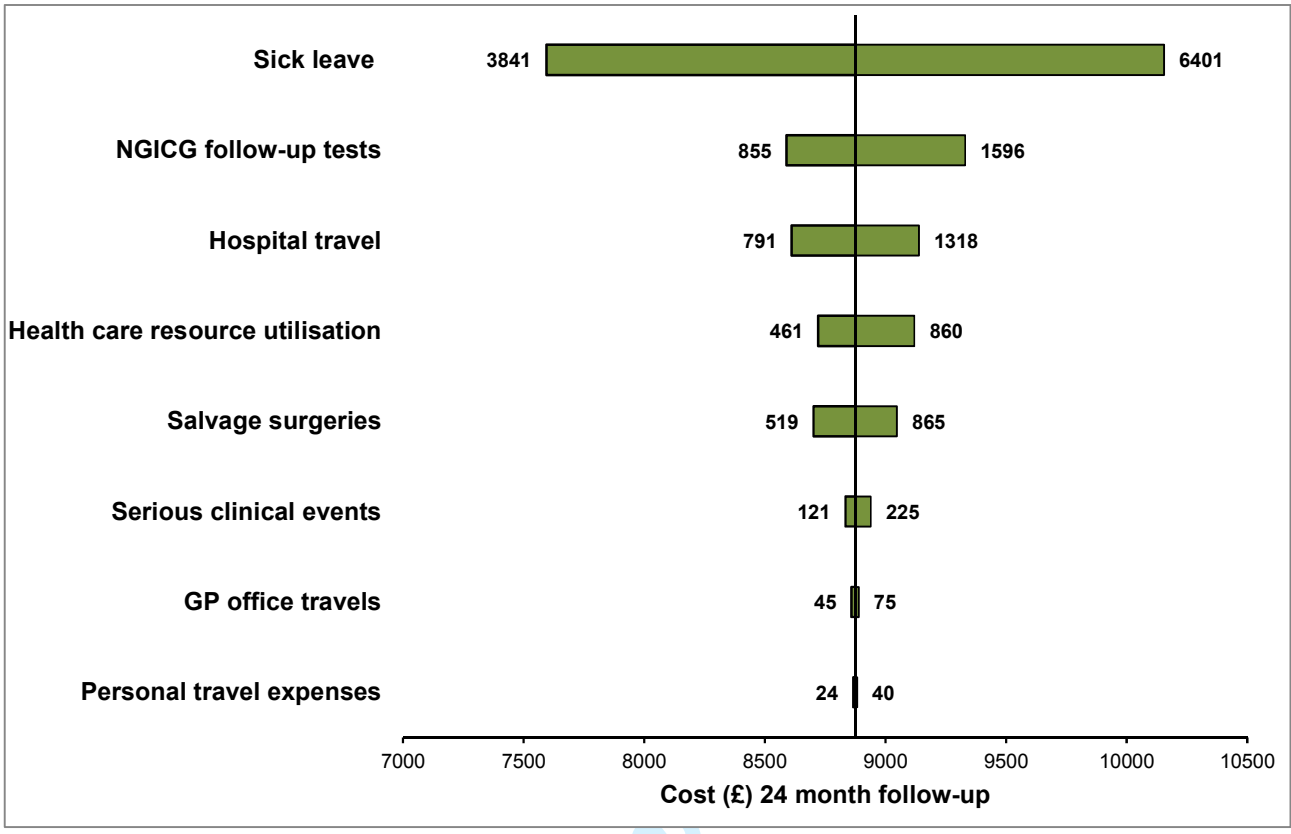

Review only



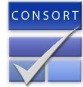

## CONSORT 2010 checklist of information to include when reporting a randomised trial\*

| Section/Topic                    | Item No | Checklist item                                                                                                                                                                              | Reported on page No |
|----------------------------------|---------|---------------------------------------------------------------------------------------------------------------------------------------------------------------------------------------------|---------------------|
| <b>Title and abstract</b>        |         |                                                                                                                                                                                             |                     |
|                                  | 1a      | Identification as a randomised trial in the title                                                                                                                                           | 1                   |
|                                  | 1b      | Structured summary of trial design, methods, results, and conclusions (for specific guidance see CONSORT for abstracts)                                                                     | 2                   |
| <b>Introduction</b>              |         |                                                                                                                                                                                             |                     |
| Background and objectives        | 2a      | Scientific background and explanation of rationale                                                                                                                                          | 3-4                 |
|                                  | 2b      | Specific objectives or hypotheses                                                                                                                                                           | 4                   |
| <b>Methods</b>                   |         |                                                                                                                                                                                             |                     |
| Trial design                     | 3a      | Description of trial design (such as parallel, factorial) including allocation ratio                                                                                                        | 4                   |
|                                  | 3b      | Important changes to methods after trial commencement (such as eligibility criteria), with reasons                                                                                          | NA                  |
| Participants                     | 4a      | Eligibility criteria for participants                                                                                                                                                       | 4                   |
|                                  | 4b      | Settings and locations where the data were collected                                                                                                                                        | 4                   |
| Interventions                    | 5       | The interventions for each group with sufficient details to allow replication, including how and when they were actually administered                                                       | 5                   |
| Outcomes                         | 6a      | Completely defined pre-specified primary and secondary outcome measures, including how and when they were assessed                                                                          | 6-7                 |
|                                  | 6b      | Any changes to trial outcomes after the trial commenced, with reasons                                                                                                                       | NA                  |
| Sample size                      | 7a      | How sample size was determined                                                                                                                                                              | 8                   |
|                                  | 7b      | When applicable, explanation of any interim analyses and stopping guidelines                                                                                                                | 10                  |
| <b>Randomisation:</b>            |         |                                                                                                                                                                                             |                     |
| Sequence generation              | 8a      | Method used to generate the random allocation sequence                                                                                                                                      | 6                   |
|                                  | 8b      | Type of randomisation; details of any restriction (such as blocking and block size)                                                                                                         | 6                   |
| Allocation concealment mechanism | 9       | Mechanism used to implement the random allocation sequence (such as sequentially numbered containers), describing any steps taken to conceal the sequence until interventions were assigned | 6                   |
| Implementation                   | 10      | Who generated the random allocation sequence, who enrolled participants, and who assigned participants to interventions                                                                     | 6                   |
| Blinding                         | 11a     | If done, who was blinded after assignment to interventions (for example, participants, care providers, those                                                                                | NA                  |

|    |                          |                                                                                                                     |       |
|----|--------------------------|---------------------------------------------------------------------------------------------------------------------|-------|
| 1  |                          |                                                                                                                     |       |
| 2  |                          | assessing outcomes) and how                                                                                         |       |
| 3  |                          |                                                                                                                     |       |
| 4  |                          | 11b If relevant, description of the similarity of interventions                                                     | 5     |
| 5  | Statistical methods      | 12a Statistical methods used to compare groups for primary and secondary outcomes                                   | 10    |
| 6  |                          | 12b Methods for additional analyses, such as subgroup analyses and adjusted analyses                                | 8-9   |
| 7  |                          |                                                                                                                     |       |
| 8  | <b>Results</b>           |                                                                                                                     |       |
| 9  | Participant flow (a      | 13a For each group, the numbers of participants who were randomly assigned, received intended treatment, and        | 11    |
| 10 | diagram is strongly      | were analysed for the primary outcome                                                                               |       |
| 11 | recommended)             | 13b For each group, losses and exclusions after randomisation, together with reasons                                | 11    |
| 12 | Recruitment              | 14a Dates defining the periods of recruitment and follow-up                                                         | 4     |
| 13 |                          | 14b Why the trial ended or was stopped                                                                              | 11    |
| 14 |                          |                                                                                                                     |       |
| 15 | Baseline data            | 15 A table showing baseline demographic and clinical characteristics for each group                                 | OK    |
| 16 | Numbers analysed         | 16 For each group, number of participants (denominator) included in each analysis and whether the analysis was      | OK    |
| 17 |                          | by original assigned groups                                                                                         |       |
| 18 |                          |                                                                                                                     |       |
| 19 | Outcomes and             | 17a For each primary and secondary outcome, results for each group, and the estimated effect size and its           | OK    |
| 20 | estimation               | precision (such as 95% confidence interval)                                                                         |       |
| 21 |                          | 17b For binary outcomes, presentation of both absolute and relative effect sizes is recommended                     | OK    |
| 22 | Ancillary analyses       | 18 Results of any other analyses performed, including subgroup analyses and adjusted analyses, distinguishing       | OK    |
| 23 |                          | pre-specified from exploratory                                                                                      |       |
| 24 |                          |                                                                                                                     |       |
| 25 | Harms                    | 19 All important harms or unintended effects in each group (for specific guidance see CONSORT for harms)            | OK    |
| 26 |                          |                                                                                                                     |       |
| 27 | <b>Discussion</b>        |                                                                                                                     |       |
| 28 | Limitations              | 20 Trial limitations, addressing sources of potential bias, imprecision, and, if relevant, multiplicity of analyses | 18-19 |
| 29 | Generalisability         | 21 Generalisability (external validity, applicability) of the trial findings                                        | 19    |
| 30 | Interpretation           | 22 Interpretation consistent with results, balancing benefits and harms, and considering other relevant evidence    | 18    |
| 31 |                          |                                                                                                                     |       |
| 32 | <b>Other information</b> |                                                                                                                     |       |
| 33 | Registration             | 23 Registration number and name of trial registry                                                                   | 2     |
| 34 | Protocol                 | 24 Where the full trial protocol can be accessed, if available                                                      | 23    |
| 35 | Funding                  | 25 Sources of funding and other support (such as supply of drugs), role of funders                                  | 21    |
| 36 |                          |                                                                                                                     |       |

37

38 \*We strongly recommend reading this statement in conjunction with the CONSORT 2010 Explanation and Elaboration for important clarifications on all the items. If relevant, we also

39 recommend reading CONSORT extensions for cluster randomised trials, non-inferiority and equivalence trials, non-pharmacological treatments, herbal interventions, and pragmatic trials.

40 Additional extensions are forthcoming: for those and for up to date references relevant to this checklist, see [www.consort-statement.org](http://www.consort-statement.org).

41

42

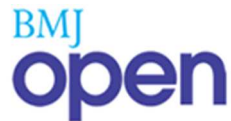

**Cost-effectiveness and quality of life in surgeon versus general practitioner organised colon cancer surveillance. A randomised controlled trial.**

|                                 |                                                                                                                                                                                                                                                                                                                                                                                                                                                                                                                                                                                                                                                                                                                                                                     |
|---------------------------------|---------------------------------------------------------------------------------------------------------------------------------------------------------------------------------------------------------------------------------------------------------------------------------------------------------------------------------------------------------------------------------------------------------------------------------------------------------------------------------------------------------------------------------------------------------------------------------------------------------------------------------------------------------------------------------------------------------------------------------------------------------------------|
| Journal:                        | <i>BMJ Open</i>                                                                                                                                                                                                                                                                                                                                                                                                                                                                                                                                                                                                                                                                                                                                                     |
| Manuscript ID:                  | bmjopen-2012-002391.R1                                                                                                                                                                                                                                                                                                                                                                                                                                                                                                                                                                                                                                                                                                                                              |
| Article Type:                   | Research                                                                                                                                                                                                                                                                                                                                                                                                                                                                                                                                                                                                                                                                                                                                                            |
| Date Submitted by the Author:   | 28-Jan-2013                                                                                                                                                                                                                                                                                                                                                                                                                                                                                                                                                                                                                                                                                                                                                         |
| Complete List of Authors:       | Augestad, Knut Magne; University Hospital of North Norway, Norwegian National Center of Integrated Care and Telemedicine<br>Norum, Jan; Northern Norway Regional Health Authority trust,<br>Dehof, Stefan; Helgeland Hospital, Mo i Rana, Department of Surgery<br>Aspevik, Ranveig; Helgeland Hospital, Mo i Rana, Department of Surgery<br>Ringberg, Unni; Nordbyen Primary Care Office,<br>Nestvold, Torunn; Nordland Hospital Trust, Bodø, Department of Surgery<br>Vonen, Barthold; Nordland Hospital Trust, Bodø, Department of Surgery<br>Skrøvseth, Stein; University Hospital North Norway, Norwegian National Center of Integrated Care and Telemedicine<br>Lindsetmo, Rolv-Ole; University Hospital North Norway, Department of Gastrointestinal Surgery |
| <b>Primary Subject Heading</b>: | Oncology                                                                                                                                                                                                                                                                                                                                                                                                                                                                                                                                                                                                                                                                                                                                                            |
| Secondary Subject Heading:      | Surgery, Evidence based practice, Health services research, Health economics, Gastroenterology and hepatology                                                                                                                                                                                                                                                                                                                                                                                                                                                                                                                                                                                                                                                       |
| Keywords:                       | colorectal cancer, follow-up, Organisation of health services < HEALTH SERVICES ADMINISTRATION & MANAGEMENT, health service research, SURGERY                                                                                                                                                                                                                                                                                                                                                                                                                                                                                                                                                                                                                       |
|                                 |                                                                                                                                                                                                                                                                                                                                                                                                                                                                                                                                                                                                                                                                                                                                                                     |

SCHOLARONE™  
Manuscripts

1  
2  
3 **Cost-effectiveness and quality of life in surgeon versus general practitioner**  
4 **organised colon cancer surveillance. A randomised controlled trial.**

5  
6 Knut Magne Augestad, *leader health services research*<sup>1,2,7</sup>, Jan Norum, *professor in*  
7 *clinical oncology*<sup>3,7</sup>, Stefan Dehof, *consultant in general surgery*<sup>4</sup>, Ranveig Aspevik,  
8 *consultant in digestive surgery*<sup>4</sup>, Unni Ringberg, *general practitioner*<sup>5</sup>, Torunn Nestvold,  
9 *consultant in digestive surgery*<sup>6</sup>, Barthold Vonen, *chief medical executive officer*<sup>6,7</sup>, Stein  
10 Olav Skrøvseth, *senior scientist in statistics*<sup>1</sup>, Rolv-Ole Lindsetmo, *professor in digestive*  
11 *surgery*<sup>2,7</sup>.  
12  
13  
14  
15  
16  
17

18 <sup>1</sup> Norwegian National Center of Integrated Care and Telemedicine, University Hospital of  
19 North Norway, Tromsø, Norway.

20  
21 <sup>2</sup> Department of Gastrointestinal Surgery, University Hospital of North Norway, Tromsø,  
22 Norway.  
23

24 <sup>3</sup> Northern Norway Regional Health Authority trust, Bodø, Norway.

25 <sup>4</sup> Department of Surgery, Helgeland Hospital, Mo i Rana, Norway.

26 <sup>5</sup> Nordbyen Primary Care Office, Tromsø, Norway.

27 <sup>6</sup> Nordland Hospital Trust, Bodø, Norway.

28 <sup>7</sup> Institute of Clinical Medicine, Faculty of Health Sciences, University of Tromsø, Norway.  
29  
30  
31  
32  
33  
34  
35  
36  
37  
38  
39  
40  
41

42 Word count: 3650  
43  
44

45 **Correspondence to:**

46 Knut Magne Augestad, MD

47 Norwegian National Center of Integrated Care and Telemedicine

48 University Hospital of North Norway

49 9037 Breivika, Norway

50 Phone: 0047 97499442

51 e-mail: knut.magne.augestad@telemed.no  
52  
53  
54  
55  
56  
57  
58  
59  
60

## Abstract

**Objective:** To assess whether colon cancer follow-up can be organised by general practitioners (GPs) without decline in patient quality of life (QoL), increase in cost, or increase in time to cancer diagnoses, compared to hospital follow-up.

**Design:** Randomised controlled trial.

**Setting:** Northern Norway Health Authority Trust, 4 trusts, 11 hospitals and 88 local communities.

**Participants:** Patients surgically treated for colon cancer, hospital surgeons and community GPs.

**Intervention:** 24 month follow-up according to national guidelines at the community general practitioner office. To ensure a high follow-up guideline adherence, a decision support tool for patients and GPs were used.

**Main outcome measures:** Primary outcome were QoL, measured by the global health scale of EORTC-QLQC30, and EQ-5D. Secondary outcomes were cost-effectiveness and time to cancer diagnoses.

**Results:** 110 patients were randomised to intervention (n=55) or control (n=55), and followed by 78 GPs (942 follow-up months) and 70 surgeons (942 follow-up months), respectively. Compared to baseline, there was a significant improvement in postoperative QoL (p=0.003), but no differences between groups were revealed (mean difference at 1,3,6,9,12,15,18,21 and 24 month follow-up appointments): Global Health;  $\Delta - 2.23$ , p=0.20; EQ-5D index;  $\Delta - 0.10$ , p=0.48, EQ-5D VAS;  $\Delta - 1.1$ , p=0.44. There were no differences in time to recurrent cancer diagnosis (GP 35 days vs. surgeon 45 days, p=0.46), 14 recurrences were detected (GP 6 vs. surgeon 8) and 7 metastases surgeries performed (GP 3 vs. surgeon 4). The follow-up program initiated 1186 health care contacts (GP 678 vs. surgeon 508), 1105 diagnostic tests (GP 592 vs. surgeon 513) and 778 hospital travels (GP 250 vs. surgeon 528). GP organised follow-up was associated with societal cost savings (£8233 vs. £9889, p<0.001).

**Conclusion:** GP organised follow-up was associated with no decline in QoL, no increase in time to recurrent cancer diagnosis and cost savings.

**Trial registration:** ClinicalTrials.gov identifier NCT00572143.

**Article summary:****Article focus:**

- Intensive follow-up after curative colon cancer resection is associated with improved overall survival of 5-10%.
- No international consensus exist regarding the detailed content of a follow-up program for colorectal cancer .
- Quality of life (QoL), cost-effectiveness and patient safety in a GP organised follow-up program is unknown.

**Key messages:**

- GP organised colon cancer follow-up is associated with no decline in QoL, no increase in time to recurrent cancer diagnosis, and cost savings.

**Strengths and limitations of this trial:**

- Intention to treat analyses with high adherence to the national follow-up program.
- First trial assessing cost-effectiveness of a GP organised colon cancer follow-up program.
- The trail was stopped after 1884 patient follow-up months due to no impact of the intervention on global health status.
- 52% of included patients were followed for two years. This limits the interpretation of recurrence, as 80% of colon cancer recurrences occurs within three years.

**Background**

Colon cancer is the third most common cancer in the western world, and surgery is the only curative treatment. Around one-third of those resected will experience recurrent disease with less than two years expected survival.<sup>1,2</sup> Despite the generally poor outcomes among patients with recurrent disease, most patients treated with curative intent are included in some form of surveillance program involving periodic evaluation. Reviews comparing various follow-up programs have suggested that more intensive strategies tend to increase five-year survival by detecting relapse about six months earlier than less intensive strategies — at a point where the patient will be more likely to be considered a candidate for potentially curative metastases surgery.<sup>2-4</sup> However,

1  
2  
3 wide consensus has not been reached regarding just what an intensive follow-up  
4 strategy should entail.<sup>5-8</sup> New surveillance trials in progress are not likely to fully settle  
5 the issue either.<sup>9-12</sup> What none of the available clinical recommendations for follow-up  
6 have addressed adequately is the *setting* where this follow-up should occur: conducted  
7 by specialists who originally treated the cancer at hospitals, or in the offices of local  
8 general practitioners (GP's).<sup>2</sup> Increasingly, the benefits of greater involvement of  
9 primary care providers in the on-going management of chronic illnesses are recognised.  
10  
11  
12  
13  
14  
15  
16  
17  
18  
19  
20  
21  
22  
23  
24  
25  
26  
27  
28  
29  
30  
31  
32  
33  
34  
35  
36  
37  
38  
39  
40  
41  
42  
43  
44  
45  
46  
47  
48  
49  
50  
51  
52  
53  
54  
55  
56  
57  
58  
59  
60

<sup>13</sup> Level of follow-up care may greatly influence quality of life and costs, especially in rural areas with long distances to travel for hospital services. However, such considerations must be balanced against the imperative that colon cancer survivors receive the best care available. Recently, the UK's National Cancer Survivorship Initiative recognised the need to develop new models of cancer care that support patient self care, care planning and making the best out of resources.<sup>14</sup> In Norway, similar national initiatives have been launched. In this trial, we tested the main hypothesis that colon cancer patients followed-up by their GP would experience similar or higher scores on quality of life measures at a lower cost than alternative hospital controls. The other aims were to test for differences of harms and benefits in a follow-up program, i.e. rate of serious clinical events (SCE), time to diagnosis of SCE and cancer recurrence, and frequency of metastases surgery.

## Methods

This was a randomised controlled multicentre trial carried out in North Norway Health Authority trust using a previously published protocol.<sup>15</sup> The first patient was included 1<sup>st</sup> of June 2007, the last patient included 15<sup>th</sup> of December 2011. Interim analyses were performed in June 2012.

## Ethics and trial registration

The Regional Committee for Medical Research Ethics, North Norway approved this protocol in 2006 (P REK NORD 79/ 2006). Patients provided written consent before entering the trial. The trial was registered in ClinicalTrials.gov with identifier NCT00572143. Due to organisational delay the trial was registered 11<sup>th</sup> of December 2007, specified study start in ClinicalTrials.gov is June 2007.

### **Inclusion and exclusion criteria**

Inclusion criteria were age less than 75 years with recent surgery for colon cancer with Dukes' stage A, B or C. Patients receiving postsurgical adjuvant chemotherapy (some Dukes' B and all Dukes' C) were also eligible. Exclusion criteria were patients older than 75 years old, patient belonging to health care trust not participating in the trial, not able to provide informed consent and Dukes D.

### **Hospitals, primary and secondary care professionals**

Three local hospitals and one university hospital participated. Approximately 100 patients with colon cancer are surgically treated annually at these four hospitals. All 550 GPs in the region received written information, 448 GPs consented to participate in the trial.

### **Objective and hypotheses**

The primary objective was to compare patients' quality of life and costs of follow-up by their local GP or at the surgical outpatient clinic. The primary hypothesis was that patients followed-up by their GP would experience similar or better QoL scores (on the global health scale) at a lower cost. The secondary objective was to test whether the incidence of serious clinical events (SCE) would be similar for patients followed-up by their GP or hospital specialist (control group), secondary hypothesis being that patients followed-up by their GP would have no delay in detection of relapse and the same frequency of SCEs as controls.

### **Description of intervention**

We defined this as a complex intervention, consisting of several interconnecting parts.<sup>16</sup> To ensure high follow-up guideline adherence by patients allocated to GP follow-up, we used a decision support tool as part of the intervention.<sup>17</sup> Thus, the intervention consisted of the following parts:

1. *GP organised colon cancer follow-up*: The patients were referred to their general practitioner for postoperative follow-up according to national guidelines (table 1). Information was given about surgery, any complications, Dukes' staging, time and location of chemotherapy (for Dukes' C patients), and risk of recurrence.
2. *Patient decision-support pamphlet*: Received at the baseline consultation,



containing information about; a) Their own disease, tumour stage and risk of recurrence; b) The aim and objective of the trial; b) The current national follow-up guidelines, i.e. schedule and location of CEA measurements, chest x-ray, contrast enhanced liver ultrasound, colonoscopy and clinical examination; b) A detailed description of signs and symptoms of potential recurrence of colon cancer; c) In case of a serious clinical event between appointments, relevant phone numbers and contact information was given.

3. *GP decision-support pamphlet*: Sent at time of baseline appointment to all GPs that had a patient allocated to their practice. This pamphlet contained similar information as the patient received i.e. information about follow-up guidelines, signs and symptoms of recurrence and behavioural strategy in the case suspicion of a recurrence. In case of questions regarding the follow-up relevant contact information was given.

Patients allocated to GP follow-up could be referred back to any surgical clinic at any time during the study period. Similarly, patients in the hospital follow-up group (controls) were free to consult their GP at any time. National follow-up guidelines were applied in both study arms and patients were followed for up to two years. The follow-up period consisted of nine follow-up cycles with regular clinical examinations, CEA measurement, chest x ray, contrast enhanced liver ultrasound and colonoscopy (table 1).

Table 1. Norwegian Gastrointestinal Cancer Group (NGICG) 2007 follow-up program.

| Examination/test                          | Follow-up cycle (months postoperative) |   |   |   |    |    |    |    |    |    |    |    |    |    |    |
|-------------------------------------------|----------------------------------------|---|---|---|----|----|----|----|----|----|----|----|----|----|----|
|                                           | 1                                      | 3 | 6 | 9 | 12 | 15 | 18 | 21 | 24 | 30 | 36 | 42 | 48 | 54 | 60 |
| Chest x-ray                               |                                        |   | X | X | X  | X  | X  | X  | X  | X  | X  | X  | X  | X  | X  |
| Contrast enhanced liver ultrasound (CEUS) |                                        |   | X | X | X  | X  | X  | X  | X  | X  | X  | X  | X  | X  | X  |
| Colonoscopy                               |                                        |   |   |   | X  |    |    |    |    |    |    |    | X  |    |    |
| CEA measurement                           | X                                      | X | X | X | X  | X  | X  | X  | X  | X  | X  | X  | X  | X  | X  |
| Clinical examination                      | X                                      | X | X | X | X  | X  | X  | X  | X  | X  | X  | X  | X  | X  | X  |

Red: Length of trial participation (24 months, 9 follow-up cycles). CEA: carcinoembryonic antigen.

## Randomisation

At study entry, patients were seen for a baseline visit by a local trial investigator at the

1  
2  
3 hospital where they received surgical treatment approximately 3-4 weeks  
4 postoperatively. At this visit, a clinical examination was performed and information  
5 about the histology and results of the surgery was shared with each patient. If the  
6 patients provided informed consent, they were randomised to follow-up either by their  
7 GP (intervention) or at the surgical outpatient clinic (controls) using a web-based  
8 randomisation service managed by the Norwegian University of Science and Technology  
9 ([www.ntnu.no](http://www.ntnu.no)). The randomisation ratio was 1:1, patients were stratified according to  
10 the Dukes' staging (A,B,C) and whether they had a stoma. The local trial investigator was  
11 not involved in the subsequent follow-up appointments in any way. Recruited patients  
12 were not informed about other patients recruited in the same trial. Similarly, no  
13 information regarding trial progress and allocation was revealed to participating GPs or  
14 surgeons. However, as GP organised follow-up represented a new practice, blinding was  
15 not possible in the intervention arm.  
16  
17  
18  
19  
20  
21  
22  
23  
24

## 25 26 27 **Primary outcome measures**

### 28 *Quality of life*

29  
30 Primary outcome measure in this trial was the global health status on the EORTC QLQ C-  
31 30 questionnaire. QoL measurements were collected at baseline and 3,6,9,12,15,18,21  
32 and 24 months, i.e:  
33  
34  
35

36  
37 *The European Organization for Research and Treatment of Cancer QoL Questionnaire*  
38 *(EORTC QLQ C-30):* EORTC QLQ C-30 incorporates nine multi-item scales: five functional  
39 scales (physical, role, cognitive, emotional and social); three symptom scales (fatigue,  
40 pain, nausea/vomiting); and a global health status/QoL scale. Six single-item scales are  
41 also included (dyspnoea, insomnia, appetite loss, constipation, diarrhoea and financial  
42 difficulties).<sup>18</sup>  
43  
44  
45  
46  
47

48  
49 *The EuroQol-5D (EQ-5D™; EuroQol Group, Rotterdam, The Netherlands):* Is a  
50 standardized generic instrument employed to measure of health outcome. EQ-5D  
51 measures five dimensions of health-related QoL (HRQoL): mobility, self-care, usual  
52 activities, pain/discomfort and anxiety/depression. Each dimension is rated at three  
53 levels: no problems (1), some problems (2) and major problems (3).<sup>19</sup> Based on  
54 preferences elicited from a general population, EQ-5D health states (e.g. 1-1-2-1-3) may  
55  
56  
57  
58  
59  
60

1  
2  
3 be converted into utility scores (= index scores, IS). In this trial we used preferences  
4 elicited from a UK population, as no similar Norwegian preferences exist.<sup>20</sup>  
5  
6 EQ Visual Analogue Scale (EQ VAS) records the respondent's self-rated health status on  
7  
8 a vertically graduated (0–100) visual analogue scale.  
9

## 10 11 12 13 **Secondary outcome measures**

### 14 *Cost-effectiveness*

15  
16 Resources used (baseline to 24 months) were registered prospectively based on reports  
17 by the patients and on hospital EMR review. The cost elements included costs related to  
18 hospital visits, GP visits, laboratory tests, radiology examinations, colonoscopy,  
19 examinations due to suspected relapse (radiology, colonoscopy, CT of thorax and/or  
20 abdomen, PET scan), treatment of recurrence, travelling/transportation, production  
21 losses, co-payments and other patient/family expenses.  
22  
23  
24  
25  
26  
27

### 28 *Time to cancer diagnoses*

29  
30 Time to cancer diagnoses was defined as the time from occurrence of a serious clinical  
31 event (SCE, dated in the GP referral or hospital EMR record) until the date of diagnoses  
32 of a SCE. A SCE was defined as an episode where cancer recurrence was suspected. A SCE  
33 can be triggered by either symptoms reported (at follow-up or in between follow-up),  
34 clinical findings at follow-up or findings by screening test. Symptoms and clinical  
35 findings initiating a diagnostic check-up were defined as: Cancer suspect lesion revealed  
36 at colonoscopy, increase in CEA measurements shown by repeated measurements, blood  
37 in stool detected by the Hemofec (FOB) test, unexplained abdominal pain, unexplained  
38 weight loss of 5 kg during the last three months, cancer-suspect lesions detected by  
39 rectal examination, palpable lymphadenopathy, metastatic suspect lesions shown by  
40 chest x-ray, ultrasound of liver or CT scan, cancer suspect findings at clinical  
41 examination, occurrence of cancer related symptoms.  
42  
43  
44  
45  
46  
47  
48  
49  
50  
51

## 52 **Data collection**

53  
54 At the baseline appointment, patients recruited received nine questionnaires (as part of  
55 the patient decision-support pamphlet) corresponding with the nine follow-up cycles  
56 (table 1). The questionnaires contained questions about QoL, patient satisfaction, and  
57  
58  
59  
60

1  
2  
3 cost and resource utilisation. Questionnaires were returned by mail every three months  
4 by the patients to the trial centre until 24 months postoperatively. These questionnaires  
5 were optically readable, being consecutively registered in the trial database. A research  
6 assistant was responsible for data collection, database input and patient reminders  
7 when missing questionnaires. The reminders were sent to participating patients when  
8 the questionnaires were 3 months overdue the estimated follow-up schedule. All  
9 questionnaires were dated and we could thus monitor trial progression. In case of  
10 missing information about cost elements we either reviewed the hospital EMR, or  
11 performed telephone interview with participating surgeons, GPs or patients.  
12  
13  
14  
15  
16  
17  
18  
19

### 20 **Sample size calculation**

21 In June 2007 sample size calculations were based on a significance level of 5% and  
22 power set at 80%, this indicated that we needed 136 patients to detect a 10 units QoL  
23 difference (i.e. a small to moderate improvement) on EORTC QLQ C-30 Global Health  
24 score with a standard deviation of 20. Definition of “a small to moderate improvement  
25 on QoL” (i.e 10 units on the global health score), and standard deviation estimates of  
26 QoL (colon cancer patients with localised disease), were retrieved from previous  
27 published publications.<sup>21,22</sup>  
28  
29  
30  
31  
32  
33  
34

### 35 **Economic analysis**

36 BMJ guidelines for economic analyses alongside randomised controlled trails were  
37 employed.<sup>23</sup> As the trial revealed no difference in quality of life, a cost-minimisation  
38 analysis was carried out. The economic evaluation had a societal perspective. A 3%  
39 discount rate was used to discount future costs and benefits. For this publication cost  
40 elements have been converted from Norwegian kroner (NOK) into British Pounds at the  
41 rate of GBP 1£ = NOK 9,39 NOK as of the Norwegian National Bank the 27<sup>th</sup> of June 2012.  
42 Details of the unit costs assigned to health care resource use are shown in table 2.  
43 Economic evaluation data are invariably positively skewed, and it requires an  
44 alternative analysis. We used a bootstrapping technique, which makes no assumptions  
45 regarding the equality, variance or shape of the distribution, and takes into account  
46 skewness.<sup>24,25</sup> To adjust for skewness cost were bootstrapped with 1000 replications to  
47 estimate bias corrected confidence intervals. The bootstrapping technique was  
48 undertaken using IBM SPSS Statistics v 19.0  
49  
50  
51  
52  
53  
54  
55  
56  
57  
58  
59  
60

A one-way sensitivity analysis was used to assess the robustness of the results and impact of variance. Societal cost of 24-month follow-up was assessed for low, base and high input values, and the result expressed as a many inputs, one output tornado chart. To increase generalizability of cost between countries, unit costs from the UK were included in the sensitivity analyses. Cost for GP consultation and diagnostic testing, has been reported to be 30-40% higher than units cost applied in this trial and relevant cost elements were increased accordingly in sensitivity analyses.<sup>26</sup>

Table 2. Details of the unit costs assigned to health care resource use data.

| Variable                                       | Unit cost (£)*          | Sensitivity analyses |
|------------------------------------------------|-------------------------|----------------------|
| <b>Cost of travel</b>                          |                         | ± 25%                |
| Mean costs hospital travel                     | 88 <sup>a</sup>         |                      |
| Hotel overnight                                | 74 <sup>b</sup>         |                      |
| Private car rates                              | 0.2 per km <sup>c</sup> |                      |
| Parking                                        | 10.6 <sup>b</sup>       |                      |
| Taxi                                           | 1.3 per km <sup>c</sup> |                      |
| Bus                                            | 2.6 <sup>c</sup>        |                      |
| <b>Cost of GP consultation</b>                 |                         | ± 25- 40%            |
| GP consultation 20 min                         | 18.5 <sup>d</sup>       |                      |
| Phone consultation GP 10 min                   | 5.3 <sup>d</sup>        |                      |
| Emergency consultation GP 30 min               | 26 <sup>d</sup>         |                      |
| <b>Cost of surgeon outpatient consultation</b> |                         | ± 25-40%             |
| Surgeon outpatient consultation 30 min         | 69 <sup>e</sup>         |                      |
| Phone consultation surgeon 15 min              | 10.6 <sup>f</sup>       |                      |
| Emergency outpatient consultation 30 min       | 69 <sup>e</sup>         |                      |
| <b>Cost of follow-up tests</b>                 |                         | ± 25-40 %            |
| Blood samples                                  | 5 <sup>d</sup>          |                      |
| Chest-X-ray                                    | 25 <sup>g,h</sup>       |                      |
| Contrast enhanced ultrasound liver             | 153 <sup>g,h</sup>      |                      |
| CT abdomen                                     | 105 <sup>g,h</sup>      |                      |
| CT thorax                                      | 105 <sup>g,h</sup>      |                      |
| Colonoscopy                                    | 293 <sup>e,h</sup>      |                      |
| PET scan                                       | 2662 <sup>g</sup>       |                      |
| <b>Cost related to sick leave</b>              |                         | ± 25%                |
| Governmental reimbursement 1 day work absence  | 102 <sup>i</sup>        |                      |
| <b>Costs related to metastases surgery</b>     |                         | ± 25%                |
| Cost of abdominal surgery                      | 14176 <sup>e</sup>      |                      |
| Cost of liver surgery                          | 11596 <sup>e</sup>      |                      |
| Cost of lung surgery                           | 13061 <sup>e</sup>      |                      |

\* Exchange rate 29<sup>th</sup> of June 2012: 1 £ = 9.36 Norwegian Kroner:

[www.dnb.no/en/currencylist?la=EN&site=DNB\\_NO](http://www.dnb.no/en/currencylist?la=EN&site=DNB_NO)

<sup>a</sup> Personal communication North Norwegian Health Administration (JN): 5 400 000 NOK budgeted annual travel expenses/950 000 annual patient travels = 88 £ per travel

<sup>b</sup> Local data.

<sup>c</sup> Norwegian National Bureau of Patient Travels: <http://www.pasientreiser.no/andre-spraak/english>.

<sup>d</sup>The Norwegian Medical Association: Norwegian Policy Document for Governmental Reimbursements in Primary Care (Fastlegetariffen) 2011: [www.legeforeningen.no/normaltariff/Fastlegetariff\\_2010.pdf](http://www.legeforeningen.no/normaltariff/Fastlegetariff_2010.pdf). *Cost of GP consultation*: 136 NOK (20 min consultation) + 386 NOK per patient annually. Assuming 10 consultations per patient annually = 38 NOK/consultation. In total 174 NOK per consultation = 18.5 £.

<sup>e</sup>Norwegian Health Authorities. Reimbursement and DRG weighting in Norwegian Hospitals 2012: <http://www.helsedirektoratet.no/publikasjoner/regelverk-innsatsstyr-finansiering-2012/Sider/default.aspx>.

<sup>f</sup>1 DRG weight: 38209 NOK. *Surgeon outpatient consultation (day and night-time)*: DRG 923 O, weight 0.017. *Colonoscopy*: DRG 710 O, weight 0.072. *Abdominal surgery*: DRG 170, weight 3.484. *Liver surgery*: DRG 201, weight 2.850. *Lung surgery*: DRG 76, weight 3.21

<sup>g</sup>Statistics in Norway 2011: Average annual salary 750 000 NOK (80 000 £) hospital consultant.

<sup>h</sup>Cost rates Department of Radiology and Nuclear Medicine University Hospital North Norway.

<sup>i</sup>Korner H. Soreide K. Stokkeland PJ. Soreide JA. Systematic follow-up after curative surgery for colorectal cancer in Norway: a population-based audit of effectiveness, costs, and compliance. *J Gastrointest Surg* 2005 Mar;9(3):320-8.

<sup>j</sup>Estimated from a median income of 350 000 NOK/year/patient as reported by patient subsample in regular work at time of surgery.

## Statistics

Descriptive statistics were performed by percentages, 2x2 contingency tables, Chi Square, Fisher Exact test and t-test. The base case analyses (n=110, 600 complete follow-up questionnaires/cycles) were performed on intention to treat principle. Treatment arms were compared with respect to potential covariates using continuous and categorical univariable analyses. The main analyses examined whether differences in outcome between baseline, 3, 6, 9, 12, 15, 18, 21 and 24 months existed in all QoL outcome measures (EORTC QLQ C-30 and EQ-5D). A general linear model was employed, where time (1-24 months) and intervention group (GPs versus Surgeon) were predictors in analyses of variance (between groups ANOVA). Missing items in a form and when missing forms, missing data were imputed by the last observation carried forward (LOCF). Conditional power (CP) was defined as the chance of getting statistically significant results at the end of the trial given the data so far.<sup>27,28</sup> We defined a CP < 15% as a sufficient threshold to stop early.<sup>29</sup> Results were expressed as mean differences for continuous outcomes with corresponding standard deviations (SD), 95% confidence intervals, and associated p-values. P-values were reported with two decimal places with p-values less than 0.001 reported as p < 0.001. For all tests we used p = 0.05 level of significance. All analyses were performed with IBM SPSS Statistics v 19.0 (IBM Company SPSS 2010) and Microsoft Excel for Mac 2011.

## Results

110 patients surgically treated for colon cancer met the inclusion criteria and agreed to participate (figure 1). The control and intervention group were matched at baseline for

demographic and medical characteristics and there were no significant differences between groups (table 3).

### Trial flow and dropouts

85 patients (75%) (GP 41 vs. surgeon 44) were followed for 12 months, 58 patients (52%) (GP 29 vs. surgeon 29) were followed for 24 months. 32 patients were defined as lost (surgeon 17 vs. GP 15), of those 14 patients had cancer recurrence (surgeon 8 vs. GP 6). 20 patients (surgeon 9 vs. GP 11) were transferred to the new national colon cancer surveillance program (figure 1).

### Response rate

We received 636 of the expected 657 questionnaires (response rate 96%), of those 600 (91%) questionnaires (GP 299 vs. surgeon 301) were included in final cost and QoL analyses. 21 (4%) of questionnaires (surgeon 11 vs. GP 10) were not returned and 36 questionnaires (surgeon 18 vs. GP 18) were excluded from analyses due to insufficient identification.

### Interim analyses

New national colon cancer surveillance guidelines were gradually implemented from 2010, with different frequency of consultations (3 month vs. 6 months interval) and radiological modalities (chest x ray vs. CT chest).<sup>7</sup> This could bias the cost-effectiveness and QoL analyses, and an interim analysis was performed in June 2012 (80% of pre planned recruitment, 1884 follow-up months). There was at this point 4% probability (i.e. conditional power) of showing a significant impact of the intervention on QoL global health score, which meant that further trial continuation were not justified.

Table 3. Baseline demographics and clinical characteristics.

| Variable         | Surgeon (%)<br>n=55 | GP (%)<br>n=55 | Total (%)<br>n=110 | p value |
|------------------|---------------------|----------------|--------------------|---------|
| <b>Age group</b> |                     |                |                    |         |
| < 50             | 2 (3.6)             | 6 (10.9)       | 7 (6.3)            | 0.10    |
| 50-59            | 8 (14.5)            | 6 (10.9)       | 14 (12.7)          | 0.56    |
| 60-69            | 23 (41.8)           | 24 (43.6)      | 47 (42.7)          | 0.84    |
| 70-75*           | 22 (40.0)           | 19 (34.5)      | 41 (38.0)          | 0.55    |

|                                  |            |            |            |      |
|----------------------------------|------------|------------|------------|------|
| Mean age (SD)                    | 66.7 (7.3) | 64.0 (8.7) | 65.4 (8.1) | 0.09 |
| <b>Gender</b>                    |            |            |            |      |
| Male                             | 32 (58.2)  | 33 (60.0)  | 65 (59.1)  | 0.84 |
| Female                           | 23 (41.8)  | 22 (40.0)  | 45 (40.9)  | 0.84 |
| <b>Education</b>                 |            |            |            |      |
| Primary                          | 20 (36.3)  | 18 (32.7)  | 38 (34.5)  | 0.68 |
| Secondary                        | 21 (38.1)  | 25 (45.4)  | 46 (41.8)  | 0.49 |
| University < 4yrs                | 8 (14.5)   | 5 (9.0)    | 13 (11.8)  | 0.37 |
| University > 4 yrs               | 6 (10.9)   | 7 (12.7)   | 13 (11.8)  | 0.76 |
| <b>Income level</b>              |            |            |            |      |
| Median (£)                       | 32-42 000  | 32-42000   | 32-42000   |      |
| <b>Main activity</b>             |            |            |            |      |
| Employment                       | 12 (21.8)  | 17 (30.9)  | 29 (26.3)  | 0.27 |
| Home                             | 3 (5.4)    | 9 (16.3)   | 11 (10.0)  | 0.06 |
| Out of work                      | 0 (0)      | 1 (1.8)    | 1 (0.9)    |      |
| Pensioner                        | 40 (72.7)  | 28 (50.9)  | 68 (61.8)  | 0.01 |
| <b>Location of surgery</b>       |            |            |            |      |
| University hospital (n=1)        | 34 (61.8)  | 37 (67.3)  | 71 (64.5)  | 0.55 |
| Local hospital (n=3)             | 21 (38.1)  | 18 (32.7)  | 39 (35.4)  | 0.55 |
| <b>Clinical characteristics</b>  |            |            |            |      |
| <b>Tumour location</b>           |            |            |            |      |
| Cøkum                            | 13 (23.6)  | 13 (23.6)  | 26 (23.6)  | 1.0  |
| Ascendens                        | 9 (16.3)   | 5 (9.1)    | 14 (12.7)  | 0.25 |
| Transversum                      | 4 (7.2)    | 5 (9.1)    | 9 (8.1)    | 0.72 |
| Decendens                        | 1 (1.8)    | 4 (1.8)    | 5 (4.5)    | 0.15 |
| Sigmoid                          | 28 (50.9)  | 28 (50.9)  | 56 (50.9)  | 1.0  |
| Elevated preoperative CEA        | 19 (34.5)  | 23(41.8)   | 42(38.1)   | 0.55 |
| <b>Type of surgery</b>           |            |            |            |      |
| Laparoscopic surgery             | 14 (25.5)  | 11 (20.0)  | 25 (22.7)  | 0.49 |
| Open surgery                     | 41 (74.5)  | 44 (80.0)  | 85 (77.3)  | 0.49 |
| <b>Tumor stage</b>               |            |            |            |      |
| Dukes A                          | 12 (21.8)  | 11 (20.0)  | 24 (21.8)  | 0.81 |
| Dukes B                          | 25 (45.5)  | 30 (54.5)  | 55 (50.0)  | 0.34 |
| Dukes C                          | 18 (32.7)  | 14 (25.5)  | 32 (29.0)  | 0.40 |
| New surgery due to complications | 6 (10.9)   | 9 (16.4)   | 15 (13.6)  | 0.40 |
| Permanent stoma                  | 8 (14.5)   | 7 (12.7)   | 15 (13.6)  | 0.78 |
| 6 months chemotherapy regime     | 18 (32.7)  | 14 (25.5)  | 32 (29.1)  | 0.40 |

\* Patients < 75 years were included in survey. P values calculated with chi square, t test and fisher exact test when appropriate.

### Quality of life

There was no significant effect on the QoL main outcome measures. However, on the EORTC QLQ C-30 subscales, there were significant effects in favour of GP follow-up, i.e. role functioning (p=0.02), emotional functioning (p= 0.01) and pain (p=0,01) (Table 4, Figure 3 A, B, C).



Table 4. Health related quality of life (ERTOC QLQ-C30 and EQ-5D) outcome variables and estimated differences.

| Outcome variable              | Mean (SD)   |             |             | Estimated mean difference<br>(95% CI) | p *  |
|-------------------------------|-------------|-------------|-------------|---------------------------------------|------|
|                               | Baseline    | 12 months   | 24 months   |                                       |      |
| <b>Global health status</b>   |             |             |             |                                       |      |
| Surgeon                       | 70.7 (22.5) | 75.9 (19.2) | 85.0(16.8)  |                                       |      |
| GP                            | 70.4 (20.8) | 81.3 (17.0) | 86.5 (16.2) | - 2.23 (-5.7 - 1.2)                   | 0.20 |
| <b>Physical functioning</b>   |             |             |             |                                       |      |
| Surgeon                       | 80.5 (23.6) | 88.8 (15.0) | 88.0 (17.0) |                                       |      |
| GP                            | 74.5 (24.9) | 90.6 (16.6) | 93.3 (16.0) | - 2.4 (-5.7 - 0.8)                    | 0.14 |
| <b>Role functioning</b>       |             |             |             |                                       |      |
| Surgeon                       | 62.5 (37.3) | 83.8 (26.5) | 90.3 (18.6) |                                       |      |
| GP                            | 62.7 (37.5) | 91.6 (22.1) | 93.7 (20.7) | - 5.1 (-9.7 - (-0.5))                 | 0.02 |
| <b>Emotional functioning</b>  |             |             |             |                                       |      |
| Surgeon                       | 87.4 (18.1) | 87.7 (16.1) | 87.7 (16.9) |                                       |      |
| GP                            | 85.8 (23.2) | 91.9 (15.8) | 94.4 (17.3) | - 3.7 (-6.8 - (-0.6))                 | 0.01 |
| <b>Cognitive functioning</b>  |             |             |             |                                       |      |
| Surgeon                       | 87.0 (20.6) | 86.5 (22.8) | 90.3 (15.0) |                                       |      |
| GP                            | 72.4 (31.8) | 91.1 (17.0) | 93.0 (21.3) | -1.7 (- 5.0 - 1.4)                    | 0.27 |
| <b>Social functioning</b>     |             |             |             |                                       |      |
| Surgeon                       | 70.7 (30.5) | 87.0 (23.8) | 90.4 (15.6) |                                       |      |
| GP                            | 72.4 (31.8) | 91.6 (17.3) | 93.0 (21.3) | -4.2 (-8.4 - (-0.009))                | 0.04 |
| <b>Fatigue</b>                |             |             |             |                                       |      |
| Surgeon                       | 32.3 (26.1) | 19.2 (17.1) | 14.6 (23.4) |                                       |      |
| GP                            | 36.9 (28.0) | 22.2 (19.9) | 18.3 (20.8) | 0.24 (-3.7 - 4.2)                     | 0.9  |
| <b>Nausea and vomiting</b>    |             |             |             |                                       |      |
| Surgeon                       | 6.0 (12.4)  | 2.8 (8.5)   | 0.9 (3.9)   |                                       |      |
| GP                            | 6.5 (14.1)  | 3.5 (9.9)   | 4.3 (10.3)  | -0.8 (-2.8 - 1.2)                     | 0.4  |
| <b>Pain</b>                   |             |             |             |                                       |      |
| Surgeon                       | 22.3 (26.6) | 11.1 (21.9) | 9.6 (16.9)  |                                       |      |
| GP                            | 19.1 (28.2) | 9.3 (14.0)  | 2.8 (14.7)  | 4.5 (0.8 - 8.2)                       | 0.01 |
| <b>Dyspnoea</b>               |             |             |             |                                       |      |
| Surgeon                       | 18.1 (26.3) | 14.2 (20.2) | 10.5 (19.4) |                                       |      |
| GP                            | 24.0 (32.7) | 12.1 (23.3) | 7.2 (21.2)  | 3.0 (-1.2 - 7.2)                      | 0.1  |
| <b>Insomnia</b>               |             |             |             |                                       |      |
| Surgeon                       | 22.9 (25.4) | 18.5 (25.7) | 17.5 (25.7) |                                       |      |
| GP                            | 28.6 (34.5) | 14.7 (23.4) | 23.6 (25.0) | 2.9 (-1.7 - 7.5)                      | 0.2  |
| <b>Appetite loss</b>          |             |             |             |                                       |      |
| Surgeon                       | 15.5 (23.1) | 3.7 (10.6)  | 1.7 (7.6)   |                                       |      |
| GP                            | 20.9 (31.7) | 1.9 (7.9)   | 4.1 (11.2)  | 0.8 (-2.9 - 3.9)                      | 0.6  |
| <b>Constipation</b>           |             |             |             |                                       |      |
| Surgeon                       | 27.4 (32.0) | 21.2 (29.9) | 10.5 (19.4) |                                       |      |
| GP                            | 18.6 (33.5) | 7.8 (16.5)  | 15.2 (19.6) | 5.1 (0.8 - 9.4)                       | 0.01 |
| <b>Diarrhoea</b>              |             |             |             |                                       |      |
| Surgeon                       | 24.4 (29.6) | 21.2 (25.3) | 24.5 (24.4) |                                       |      |
| GP                            | 31.0 (33.6) | 22.5 (26.8) | 23.6 (28.6) | -1.0 (-5.7 - 3.5)                     | 0.6  |
| <b>Financial difficulties</b> |             |             |             |                                       |      |
| Surgeon                       | 9.8 (26.2)  | 9.2(20.4)   | 7.0 (21.0)  |                                       |      |
| GP                            | 6.9 (21.2)  | 1.9 (7.9)   | 4.1 (11.2)  | 2.7 (-0.4 - 5.8)                      | 0.08 |
| <b>EQ-5D Index score</b>      |             |             |             |                                       |      |
| Surgeon                       | 0.83 (0.16) | 0.85(0.20)  | 0.90 (0.14) |                                       |      |
| GP                            | 0.79 (0.22) | 0.87(0.18)  | 0.89 (0.13) | - 0.10 (-0.039-0.018)                 | 0.48 |

**EQ-5D VAS score**

|         |             |             |             |                  |      |
|---------|-------------|-------------|-------------|------------------|------|
| Surgeon | 72.2 (18.9) | 78.2 (16.2) | 82.4 (16.6) |                  |      |
| GP      | 67.4 (17.4) | 79.0 (14.6) | 83.5 (14.8) | -1.10 (-3.9-1.7) | 0.44 |

\* Adjusted general linear model from 1800 follow-up months, i.e. 600 QoL questionnaires (GP 299 vs. surgeon 301).

**Cost-effectiveness**

There were no significant difference on primary QoL measure (Global health status), and a cost minimisation analyses were performed. A total of 778 travels (consultations, radiological investigations, colonoscopy) to hospital were registered, 528 in the surgeon group and 250 in the GP group, respectively. A total of 1186 health-care contacts (regular appointments, emergency appointments, phone consultations) were registered, 678 in the GP group versus 508 in the surgeon group (table 5). Mean cost of follow-up per patient per follow-up cycle was £292 in GP group and £351 in surgeon group ( $p=0.02$ ) (figure 4). Overall mean societal cost per patient for 24 months follow-up were £ 9889 in the surgeon group and £ 8233 in the GP group ( $p<0.001$ , table 6).

Table 5. Resource use in a colon cancer follow-up program.

| Cost variable                         | Surgeon<br>n=55  |             |                | GP<br>n=55       |             |                | Total<br>n=110   |             |               |
|---------------------------------------|------------------|-------------|----------------|------------------|-------------|----------------|------------------|-------------|---------------|
|                                       | n                | n/<br>cycle | cost/<br>cycle | n                | n/<br>cycle | cost/<br>cycle | n                | n/<br>cycle | cost/cycle    |
| <b>Follow-up months</b>               | 903              |             |                | 897              |             |                | 1800             |             |               |
| <b>Hospital travels</b>               |                  |             |                |                  |             |                |                  |             |               |
| Car                                   | 189              | 0.62        | a              | 113              | 0.37        | a              | 302              | 0.50        | a             |
| Taxi                                  | 37               | 0.12        |                | 22               | 0.07        |                | 59               | 0.09        |               |
| Bus                                   | 96               | 0.31        |                | 33               | 0.11        |                | 129              | 0.21        |               |
| Airplane                              | 0                | 0           |                | 8                | 0.02        |                | 8                | 0.01        |               |
| Express boat                          | 43               | 0.14        |                | 12               | 0.04        |                | 55               | 0.09        |               |
| Extra travel due to<br>poor logistics | 104              | 0.34        |                | 52               | 0.17        |                | 156              | 0.26        |               |
| Travel assistant                      | 59               | 0.19        |                | 10               | 0.03        |                | 69               | 0.11        |               |
| Hotel                                 | 7                | 0.02        | 1.7<br>(11)    | 8                | 0.02        | 2.0<br>(12)    | 15               | 0.02        | 1.8<br>(11.6) |
| Total                                 | 528 <sup>a</sup> | 1.75        |                | 250 <sup>a</sup> | 0.83        |                | 778 <sup>a</sup> | 1.29        |               |
| Mean cost                             |                  |             | 156.9          |                  |             | 76.7 (160.1,   |                  |             | 117.1         |
| £ (SD)                                |                  |             | (145.0)        |                  |             | $p<0.001$ )    |                  |             | (157.7)       |
| <b>GP office travels</b>              |                  |             |                |                  |             |                |                  |             |               |
| Car                                   | 155              | 0.51        | b              | 317              | 1.06        | b              | 472              | 0.78        | b             |
| Taxi                                  | 7                | 0.02        |                | 14               | 0.05        |                | 21               | 0.03        |               |
| Bus                                   | 17               | 0.06        |                | 35               | 0.12        |                | 52               | 0.08        |               |
| Travel assistant                      | 0                | 0           |                | 15               | 0.05        |                | 15               | 0.02        |               |

|                                  |           |      |              |           |      |               |           |      |              |
|----------------------------------|-----------|------|--------------|-----------|------|---------------|-----------|------|--------------|
| Total                            | 179       | 0.59 |              | 381       | 1.27 |               | 560       | 0.93 |              |
| Mean cost                        |           |      | 4.1          |           |      | 9.0 (9.1,     |           |      | 6.6          |
| £ (SD)                           |           |      | (7.9)        |           |      | p<0.001)      |           |      | (8.9)        |
| <b>Out of pocket expenses</b>    |           |      |              |           |      |               |           |      |              |
| Mean cost                        |           |      | 2.7          |           |      | 4.3 (15.0,    |           |      | 3.5 (11.9)   |
| £ (SD)                           |           |      | (7.7)        |           |      | p=0.10)       |           |      |              |
| <b>Health care contacts</b>      |           |      |              |           |      |               |           |      |              |
| GP consultations                 | 156       | 0.52 | 9.6 (17.8)   | 329       | 1.10 | 20.6 (19.9)   | 485       | 0.80 | 15.1 (19.6)  |
| GP phone consultation            | 61        | 0.20 | 1.0 (3.9)    | 94        | 0.31 | 1.7 (4.3)     | 155       | 0.25 | 1.4 (4.1)    |
| GP emergency consultations       | 23        | 0.08 | 1.9 (12.2)   | 37        | 0.12 | 3.2 (14.4)    | 60        | 0.1  | 2.6 (13.3)   |
| Surgeon outpatient consultations | 227       | 0.75 | 52.3 (93.8)  | 185       | 0.61 | 43.3 (104.1)  | 412       | 0.68 | 47.8 (99.0)  |
| Surgeon phone consultations      | 41        | 0.14 | 1.45 (5.7)   | 33        | 0.11 | 1.2 (4.4)     | 74        | 0.12 | 1.32 (5.1)   |
| Total                            | 508       | 1.68 |              | 678       | 2.26 |               | 1186      | 1.97 |              |
| Mean cost                        |           |      | 66.4         |           |      | 70.1 (112.2,  |           |      | 68.2         |
| £ (SD)                           |           |      | (100.1)      |           |      | p=0.67)       |           |      | (106.1)      |
| <b>NGICG follow-up tests</b>     |           |      |              |           |      |               |           |      |              |
| Blood samples                    | 203       | 0.67 | 3.3 (5.1)    | 300       | 1.0  | 5.1 (6.8)     | 503       | 0.83 | 4.2 (6.0)    |
| Chest x ray                      | 150       | 0.50 | 12.2 (12.2)  | 128       | 0.43 | 10.6 (12.1)   | 278       | 0.46 | 11.4 (12.2)  |
| CEUS                             | 110       | 0.37 | 56.2 (74.0)  | 99        | 0.33 | 51 (72.5)     | 209       | 0.34 | 53.8 (73.2)  |
| Colonoscopy                      | 50        | 0.17 | 49.2 (110.3) | 65        | 0.22 | 65.1 (122)    | 115       | 0.19 | 57.1 (116.7) |
| Total                            | 513       | 1.70 |              | 592       | 1.97 |               | 1105      | 1.84 |              |
| Mean cost                        |           |      | 121.1        |           |      | 132.2 (166.7, |           |      | 126.6        |
| £ (SD)                           |           |      | (152.8)      |           |      | p=0.39)       |           |      | (159.8)      |
| <b>Work loss</b>                 |           |      |              |           |      |               |           |      |              |
| Patients in paid work (n)        | 17        |      |              | 12        |      |               | 29        |      |              |
| Days off work mean (SD)          | 215 (168) |      |              | 198 (190, |      |               | 208 (219) |      |              |
| Mean cost                        |           |      | 2440         |           |      | 1884 (2092,   |           |      | 2086         |
| £ (SD)                           |           |      | (1906)       |           |      | p=0.45)       |           |      | (2014)       |
| <b>Serious clinical events</b>   |           |      |              |           |      |               |           |      |              |
| Number of events                 | 22        |      |              | 26        |      |               | 48        |      |              |
| Mean cost                        |           |      | 261.6        |           |      | 573.1 (838.9, |           |      | 444.0        |
| £ (SD)                           |           |      | (157.7)      |           |      | p=0.14)       |           |      | (662.4)      |
| <b>Metastases surgeries</b>      |           |      |              |           |      |               |           |      |              |

|                        |          |          |          |
|------------------------|----------|----------|----------|
| Cancer recurrences     | 8        | 6        | 14       |
| Metastases surgeries   | 4        | 3        | 7        |
| <sup>e</sup> Mean cost | 9037.2   | 13316.0  | 10871.0  |
| £ (SD)                 | (5117.5) | (1489.0, | (4366.3) |
|                        |          | p=0.22)  |          |

<sup>a</sup> Mean travel cost for hospital travels, see table 2. <sup>b</sup> Values calculated with a median distance GP office 30 km. <sup>c</sup> Value represent the mean cost (standard deviation) relating to the subsample who were in paid work at time of surgical treatment. NGICG: Norwegian Gastrointestinal Cancer Group. Follow-up cycle = 3 months. CEUS: Contrast enhanced liver ultrasound. <sup>d</sup> Value represent the mean cost (standard deviation) of work up tests (CEA, chest x-ray, colonoscopy) relating to the subsample who experienced a serious clinical event. <sup>e</sup> Value represent the mean cost (standard deviation) relating to the subsample who performed metastases surgery.

Table 6. Cost of colon cancer follow-up

| Cost Variable (mean, £)                   | Surgeon<br>n=55 | GP<br>n=55  | Total<br>n=110 | p value |
|-------------------------------------------|-----------------|-------------|----------------|---------|
| <b>Healthcare cost/follow-up cycle</b>    | 351             | 292         | 324.1          | 0.02    |
| Bootstrapped 95% c.i                      | 315 - 386       | 255 - 327   | 296 - 348      |         |
| Mean difference £                         |                 | 58          |                |         |
| <b>Healthcare cost/24 month follow-up</b> | 3178            | 2651        | 2917           | 0.03    |
| Bootstrapped 95% c.i                      | 2833 - 3485     | 2228 - 3006 | 2660 - 3147    |         |
| Mean difference £                         |                 | 529         |                |         |
| <b>Societal cost/ follow-up cycle</b>     | 1098            | 914         | 1007           | < 0.001 |
| Bootstrapped 95% c.i.                     | 1062 - 1139     | 877 - 954   | 981 - 1034     |         |
| Mean difference £                         |                 | 184         |                |         |
| <b>Societal cost/24 month follow-up</b>   | 9889            | 8233        | 9068           | < 0.001 |
| Bootstrapped 95% c.i.                     | 9569 - 10194    | 7904 - 8619 | 8823 - 9320    |         |
| Mean difference £                         |                 | 1656        |                |         |

In estimation of health care and societal cost, cycles with complete cost data (n=600 i.e. 1800 follow-up months) were included in analyses (as defined in table 1). Cost data from 57 follow-up cycles were excluded from analyses (incomplete ID or not returned forms). Cost of sick leave was adjusted for baseline characteristic. Cost of serious clinical events and metastases surgeries were adjusted for the percentage of events. Fu: follow-up. C.i: confidence interval, based on 1000 stratified bootstrap samples.

### Sensitivity analyses

The single factor with greatest impact on overall societal costs was sick-leave followed by cost of follow-up tests and cost of hospital travels. Variances in cost related to GP office travels and follow-up appointments had minor impact on overall cost in a follow-up program (figure 5).

### *Time to cancer diagnoses*

48 serious clinical events (SCE) occurred, mean time until diagnosis of a serious clinical event was 45 days in the surgeon group and 35 days in the GP group ( $p=0.46$ ). Of patients with SCE, 14 patients had cancer recurrence and 7 patients (50%) were offered metastases surgery. Median time to diagnoses of recurrence was 21 days in the GP group (range 2-270 days) and 30 days in the surgeon group (range 3-45 days). Five patients died (all deaths caused by disseminated colon cancer) during the follow-up period (GP 1 vs. surgeon 4).

## **Discussion**

### **Summary of findings**

A representative population of patients surgically treated for colon cancer participated in this trial, with an expected normal variance of demographic factors and colon cancer severity. In this study patients were followed for up to two years, i.e. the period with most cancer recurrences and serious clinical events, which again would impact QoL and costs of follow-up. We have shown that a decentralised colon cancer follow-up program will not impair QoL, on the contrary we observed a significant improvement in the following QoL subscales; role functioning, emotional functioning and pain. This is the first trial evaluating the economical implications of a GP organised follow-up program after curative resection for colon cancer. Despite a higher frequency of health care contacts in primary care, a decentralised GP organised follow-up program was associated with total cost savings due to decreased cost of primary care consultations and less hospital travels. Importantly, our result shows that GP follow-up was not associated with increased time to diagnosis of SCE and thus cancer recurrence (35 versus 45 days,  $p=0.46$ ), and the frequency of a SCE was similar in both groups.

### **Comparison with existing literature and on going trials**

Although intensive follow-up is associated with improved survival, there are still international controversies on how to best organise follow-up of colon cancer patients. These controversies are mirrored in the wide variation of national follow-up guidelines.

1  
2  
3 4-7 Two systematic reviews, comparing follow-up trials have been published. 2,3 Due to  
4 the variation in the follow-up programs included in these reviews, it is not possible to  
5 infer the best combination of consultations, blood tests, colonoscopy, radiological  
6 investigations and level of care to maximise the outcomes. 2 Large randomised trials are  
7 under way (COLOFOL, GILDA, FACS) but results are most likely years away. 9-11 Few  
8 published surveys have evaluated the effect of a GP organised follow-up program. Two  
9 surveys have reported on quality of life in a primary care based follow-up program, and  
10 a single cost-effectiveness analysis of intensified hospital based follow-up was published  
11 in 2004. 30-32 Surveys have assessed cost of follow-up in a Norwegian setting. In a  
12 retrospective survey 314 patients were assessed with regards to cost, compliance and  
13 success rate of curative surgery. It was concluded that the cost of one successful curative  
14 surgery was \$ 25 289, and that further implementation of such a program should be  
15 debated. 33 Harms and unintended effects of a follow-up program is poorly explored.  
16 Especially is the rate of false positive tests in a follow-up program unknown. Current  
17 surveillance is often based on serial CEA measurements, this biomarker has several  
18 pitfalls and shortcomings. In a recent survey, it is shown that the diagnostic accuracy of  
19 serial measurement of CEA is low, and is impacted by the cut off value. 34 These aspects  
20 are of high importance when designing a follow-up program, as false positive test  
21 probably has a negative impact on the patients quality of life. Finally, there exist  
22 considerable variance in follow-up strategies, internationally and at a national level. 35  
23 This makes outcome comparison between different follow-up strategies challenging.  
24 For other cancer conditions more cost-effective ways of organising follow-up is  
25 extensively described and evaluated. For breast cancer patients, nurse lead telephone  
26 and GP organised follow-up is cost-effective 36,37,38 with no increase in the frequency of  
27 SCE. 39 Nevertheless, the quality of primary care cancer management is still debated. 40-42

### 47 **Strengths and limitations**

48 Our trial has several strengths. Firstly, this is the first randomised trial addressing the  
49 economical implications and time to recurrent cancer diagnoses in a GP organised colon  
50 cancer follow-up program. We have shown that GP organised follow-up, even with  
51 increased frequency of health care contacts, was associated with cost savings and no  
52 decline in quality of life. Secondly, poor guideline compliance has been shown to  
53 represent a problem in cancer follow-up programs. 43 However, tools to support

1  
2  
3 decision making in cancer are on way forward. In this study, a decision support  
4 pamphlet was part of the intervention and the patient and the GP organising the follow-  
5 up received a decision support tool. Detailed instructions of forthcoming follow-up  
6 consultations and test were given. We believe this decision support tool contributed to a  
7 high follow-up guideline adherence (table 6, GP 592 tests vs. surgeon 513 tests). Thirdly,  
8 we have shown that the rate of SCE and time to diagnosis of cancer recurrence is  
9 comparable between groups. In our opinion, this is an indicator of adequate quality in a  
10 GP organised follow-up program.  
11  
12  
13  
14  
15  
16

17  
18 There exist limitations. Firstly, it might be argued that we were missing important  
19 information by choosing another endpoint than survival. However, this trial was  
20 designed primarily to evaluate whether general practice follow-up results in effect on  
21 patient specific quality of life and cost effectiveness. We acknowledge that this choice of  
22 endpoint might impact the observed frequency of serious clinical events and time to  
23 cancer diagnoses, as a higher number of SCE and cancer recurrences would have  
24 occurred with a longer follow-up time. Similarly, costs will be impacted by a longer  
25 follow-up time. However, when health care cost of follow-up is analysed separately  
26 (table 5, figure 3), cost spendings are significantly lower in the GP group compared to  
27 the surgeon group. Secondly, generalizability and cost transferability across  
28 jurisdictions might be challenging, as elements of cost data may vary from place to  
29 place.<sup>44</sup> It might be argued that this is a single country trial with limited generalizability.  
30 However, we do not think this is the case. Comparable follow-up trials have been  
31 performed in countries like USA, Canada, UK, Australia, Netherlands.<sup>30,38,39,45</sup> These  
32 surveys are commonly cited and thus accepted as generalizable. In Norway, the GP has a  
33 traditional gatekeeper function and plays a central role managing resource use in  
34 secondary care. Similarly, many European countries have a health care organisation  
35 where the GP plays a central role as gatekeeper to access of secondary health care  
36 service. In our trial, guidelines for dealing with aspects of generalizability and  
37 transferability were applied, and variations in units costs were included in the  
38 sensitivity analyses (see figure 4).<sup>44</sup>  
39  
40  
41  
42  
43  
44  
45  
46  
47  
48  
49  
50  
51  
52  
53

54 Finally, the trial was stopped after 1884 follow-up months due to no significant effect of  
55 the intervention on global health score and implementation of a new national follow-up  
56 program. This is a limitation, as it will impact the interpretation of cancer recurrence.  
57  
58  
59  
60

1  
2  
3 However, it would have been unethical to spend large resources over years to complete  
4 an intervention with a 4% probability of showing a significant impact on global health  
5 score.  
6  
7

### 8 9 **Implication for patients, decision makers and clinicians**

10 Colon cancer in numbers is the third largest cancer type worldwide and a considerable  
11 number of patients are enrolled in a post surgical surveillance program, resulting in  
12 significant societal cost. However, as there is no evidence based consensus of how to  
13 design cost-effective follow-up programs, differences in tests, test frequency and level of  
14 care will have high impact on societal cost spending. Therefore, the cost driving  
15 elements in a colon cancer follow-up program have to be critically evaluated.  
16  
17

18 From a societal perspective, this survey has important implications. It may be argued  
19 that there are limited benefits from having GPs organising the follow-up program, as the  
20 radiological examinations and the colonoscopy have to be performed in-hospital  
21 anyway. However, we believe the most important factors causing a less costly GP follow-  
22 up are: *Better coordination of care:* As shown in table 5, GP organised follow-up leads to  
23 fewer hospital travels. We believe this is mainly caused by improved coordination of  
24 care, for instance by performing multiple radiological test at the same hospital visit.  
25 Interestingly the GP group had fewer extra travels (GP 52 travels versus Surgeon 102  
26 travels) due to poor logistics (table 5). *Cost of GP consultation vs. hospital consultation:*  
27 The societal cost of GP consultations is lower compared to cost of hospital consultations,  
28 due to a more costly hospital infrastructure. *Complex and chronic conditions:* Patients  
29 surgically treated often have other chronic illnesses, and there is a trend towards higher  
30 involvement of primary care in treating these conditions as described in the chronic care  
31 model.<sup>13</sup> *Sick leave:* Although not statistical significant, patients in the GP group return  
32 to work 17 days (mean) earlier compared to patients in the surgeon group.  
33  
34

35 In a time with escalating health care cost, especially in cancer care, improved  
36 coordination of care are of increasing importance.  
37  
38

39 From a patient perspective, GP organised follow-up is associated with high quality of  
40 care and leads to fewer time consuming hospital travels. Our study demonstrates that a  
41 decentralised follow-up has no negative impact on quality of life, length to cancer  
42 diagnoses and follow-up guideline adherence.  
43  
44

45 From a hospital perspective, a transfer of follow-up programs to primary care have  
46  
47  
48  
49  
50  
51  
52  
53  
54  
55  
56  
57  
58  
59  
60



1  
2  
3 economical and organisational implications. GP organised follow-up may be an effective  
4 way of reducing the burden on busy hospital clinics.  
5  
6

### 7 8 **Conclusion**

9  
10 The present study suggests that colon cancer follow-up can safely be performed by GPs,  
11 with no negative impact on quality of life and to a lower cost. However, there exist  
12 limitations. 13% (n=14) patients had colon cancer recurrence, this low recurrence rate  
13 is most likely caused by limited long term follow-up as most recurrences occur within 3  
14 years. Furthermore, the best combination of consultations, radiological test, blood  
15 samples and colonoscopy that optimizes cancer survival is still unknown. We therefore  
16 argue that cost driving elements of colon cancer surveillance should be critically  
17 evaluated, when designing and implementing follow-up programs, as cancer  
18 surveillance represents a huge financial burden for society. Finally, little is known about  
19 the potential harms of follow-up, especially when it comes to the impact of false positive  
20 tests. Further research is needed to settle these controversies, and new methods of  
21 decision-analytic modeling in combination with emerging data from on-going  
22 randomised trials must be applied.<sup>46</sup>  
23  
24  
25  
26  
27  
28  
29  
30  
31  
32  
33

### 34 **Contribution**

35  
36 KMA and ROL conceived and designed the research idea, and were responsible for the  
37 overall administration and direction of the study, the analysis and interpretation of data.  
38 KMA and SOS designed the statistical analyses. KMA did the statistical analyses. KMA did  
39 the economic analysis with assistance from JN, who contributed to the design, data  
40 analysis, and interpretation of the findings. TN, RA and SD helped with patient  
41 recruitment and randomization, and to do the trial and interpreted the findings. UR  
42 advised on the trial protocol, unit cost and reimbursement practice in primary care. BV  
43 advised on protocol writing and pre trial sample size calculations and manuscript  
44 revision. KMA wrote the first draft. All authors read and approved the final manuscript.  
45 KMA had full access to all the data in the study and had final responsibility for the  
46 decision to submit for publication.  
47  
48  
49  
50  
51  
52  
53  
54  
55  
56  
57  
58  
59  
60

### Competing interest

All authors have completed the ICMJE uniform disclosure form at [www.icmje.org/coi\\_disclosure.pdf](http://www.icmje.org/coi_disclosure.pdf) (available on request from the corresponding author) and declare: The study was funded by a research grant from Northern Norwegian Health Authorities. The authors declare that they have no conflicts of interest.

### Acknowledgements

We thank Trine Hansen at Norwegian Centre for Integrated Care and Telemedicine for administrative support and for maintaining the research database. We thank professor Roar Johnsen, Department of Public Health and General Practice, Norwegian University of Science and Technology, for assistance in protocol writing and design of trial. We thank professor Lars Vatten, Department of Epidemiology, Norwegian University of Science and Technology for assistance in prestudy sample size calculations. We thank Johnie Rose, MD, PhD, Department of Family Medicine and Community Health, Case Western Reserve University, for valuable comments on our research and manuscript. We thank Dr Caroline Sagatun (Surgical Department, Bodø Regional Hospital), Dr Henriette Fagertun (Surgical Department, Harstad Hospital), for comments on the study protocol and identification of potential trial participants. We thank Frank Hauboff (Surgical Outpatient Clinic, University Hospital of North Norway) for assistance in randomisation and identification of potential trial participants. We thank Berit Marianne Bjelkåsen, Norwegian University of Science and Technology, for assistance with the web based randomisation service.

### Data sharing

No additional data available.

### Copyright for authors

The Corresponding Author has the right to grant on behalf of all authors and does grant on behalf of all authors, a worldwide licence to the Publishers and its licensees in perpetuity, in all forms, formats and media (whether known now or created in the future), to i) publish, reproduce, distribute, display and store the Contribution, ii) translate the Contribution into other languages, create adaptations, reprints, include within collections and create summaries, extracts and/or, abstracts of the Contribution,

1  
2  
3 iii) create any other derivative work(s) based on the Contribution, iv) to exploit all  
4 subsidiary rights in the Contribution, v) the inclusion of electronic links from the  
5 Contribution to third party material where-ever it may be located; and, vi) licence any  
6 third party to do any or all of the above.  
7  
8  
9

## 10 11 12 **References**

- 13 1 Larsen IK, editor. Cancer in Norway 2009. *Cancer Registry of Norway* 2011; : 1–169.
- 14 2 Jeffery M. Follow-up strategies for patients treated for non-metastatic colorectal  
15 cancer. *The Cochrane Collaboration* 2007: 1–31.
- 16 3 Tjandra JJ, Chan MKY. Follow-Up After Curative Resection of Colorectal Cancer: A  
17 Meta-Analysis. *Dis Colon Rectum* 2007; **50**: 1783–99.
- 18 4 Figueredo A, Rumble RB, Maroun J, *et al*. Follow-up of patients with curatively  
19 resected colorectal cancer: a practice guideline. *BMC Cancer* 2003; **3**: 26.
- 20 5 Scholefield J, editor. Guidelines for the Management of Colorectal Cancer. *The*  
21 *Association of Coloproctology of Great Britain and Ireland* 2007; **3**: 1–117.
- 22 6 Bülow S, editor. Retningslinier for diagnostik og behandling af kolorektal cancer  
23 (Danish Guidelines). *Danish Colorectal Cancer Group* 2009; **4**: 1–176.
- 24 7 Vonen B, editor. Nasjonalt handlingsprogram med retningslinjer for diagnostikk,  
25 behandling og oppfølging av kreft i tynntarm og endetarm (Norwegian Guidelines).  
26 *Norwegian Gastrointestinal Cancer Group NGICG* 2010: 1–162.
- 27 8 Engstrom PF, editor. NCCN Clinical Practice Guidelines in Oncology Colon Cancer  
28 V.2.2009. *National Comprehensive Cancer network* 2009; **2**: 1–71.
- 29 9 Follow-Up Study of Patients Who Have Undergone Surgery for Stage I, Stage II, or  
30 Stage III Colorectal Cancer. *clinicaltrials.gov*. 2009: 1–4.
- 31 10 Grossmann EM, Johnson FE, Virgo KS, Longo WE, Fossati R. Follow-up of colorectal  
32 cancer patients after resection with curative intent—the GILDA trial. *Surgical*  
33 *Oncology* 2004; **13**: 119–24.
- 34 11 Wille-Jørgensen P, Laurberg S, Carriquiry L, *et al*. An interim analysis of recruitment  
35 to the COLOFOL trial. *Colorect Dis* 2009; **11**: 756–8.
- 36 12 Wille-Jørgensen P, Balleby L. Follow-up in colorectal cancer: questions to be  
37 answered. *Colorect Dis* 2011; **13**: 959–60.
- 38 13 Bodenheimer T, Wagner EH, Grumbach K. Improving primary care for patients with  
39 chronic illness. *JAMA: The Journal of the American Medical Association* 2002; **288**:  
40 1775–9.
- 41 14 National Cancer Survivor Initiative. *Department of Health, Macmillan Cancer*

1  
2  
3 *Support and NHS Improvement, London, UK 2010; : 1-82.*

- 4  
5 15 Augestad KM, Vonen B, Aspevik R, *et al.* Should the surgeon or the general  
6 practitioner (GP) follow up patients after surgery for colon cancer? A randomized  
7 controlled trial protocol focusing on quality of life, cost-effectiveness and serious  
8 clinical events. *BMC Health Serv Res* 2008; **8**: 137.
- 9  
10  
11 16 Campbell NC. Designing and evaluating complex interventions to improve health  
12 care. *BMJ* 2007; **334**: 455-9.
- 13  
14 17 Kawamoto K. Improving clinical practice using clinical decision support systems: a  
15 systematic review of trials to identify features critical to success. *BMJ* 2005; **330**:  
16 765-0.
- 17  
18 18 Sprangers MA, Cull A, Bjordal K, Groenvold M, Aaronson NK. The European  
19 Organization for Research and Treatment of Cancer. Approach to quality of life  
20 assessment: guidelines for developing questionnaire modules. EORTC Study Group  
21 on Quality of Life. *Qual Life Res* 1993; **2**: 287-95.
- 22  
23  
24 19 Dolan P. Modeling valuations for EuroQol health states. *Med Care* 1997; **35**: 1095-  
25 108.
- 26  
27 20 Dolan P. The Time Trade-off method: Results from a general population study.  
28 *Health Economics* 2006; **5**: 1-14.
- 29  
30 21 Cambell M. Estimating sample sizes for binary, ordered categorical, and continuous  
31 outcomes in two group comparisons. *BMJ* 1995; **311**: 1145-7.
- 32  
33 22 King M. The interpretation of scores from the EORTC quality of life questionnaire  
34 QLQ-C30. *Quality of Life Research* 2004; **5**: 555-67.
- 35  
36 23 Drummond M. Guidelines for authors and peer reviewers of economic submissions  
37 to the BMJ. *BMJ* 1996; **313**: 275-83.
- 38  
39 24 Drummond M, Sculpher MJ, Torrance GW. *Methods for the Economic Evaluation of*  
40 *Health Care Programmes.* 2005.
- 41  
42 25 Desgagné A, Castilloux A, Angers J, LeLorier J. The use of the bootstrap statistical  
43 method for the pharmacoeconomic cost analysis of skewed data.  
44 *Pharmacoeconomics* 1998; **13**: 487-97.
- 45  
46  
47 26 Hill JC, Whitehurst D, Lewis M, *et al.* Comparison of stratified primary care  
48 management for low back pain with current best practice (STarT Back): a  
49 randomised controlled trial. *Lancet* 2011; **378**: 1560-71.
- 50  
51  
52 27 Lachin JM. Futility interim monitoring with control of type I and II error  
53 probabilities using the interim Z-value or confidence limit. *Clin Trials* 2009; **6**: 565-  
54 73.
- 55  
56 28 Lachin JM. A review of methods for futility stopping based on conditional power.  
57 *Statist Med* 2005; **24**: 2747-64.
- 58  
59  
60

- 1  
2  
3 29 Jitlal M, Khan I, Lee SM, Hackshaw A. Stopping clinical trials early for futility:  
4 retrospective analysis of several randomised clinical studies. *Br J Cancer* 2012; **107**:  
5 910–7.  
6  
7 30 Wattchow DA, Weller DP, Esterman A, *et al.* General practice vs surgical-based  
8 follow-up for patients with colon cancer: randomised controlled trial. *Br J Cancer*  
9 2006; **94**: 1116–21.  
10  
11 31 Renehan AG, O'Dwyer ST, Whynes DK. Cost effectiveness analysis of intensive  
12 versus conventional follow up after curative resection for colorectal cancer. *BMJ*  
13 2004; **328**: 1–5.  
14  
15 32 Gall CA, Weller D, Esterman A, *et al.* Patient Satisfaction and Health-Related Quality  
16 of Life After Treatment for Colon Cancer. *Dis Colon Rectum* 2007; **50**: 801–9.  
17  
18 33 Körner H, Søreide K, Stokkeland PJ, Søreide JA. Systematic Follow-up After Curative  
19 Surgery for Colorectal Cancer in Norway: A Population-Based Audit of  
20 Effectiveness, Costs, and Compliance. *Journal of Gastrointestinal Surgery* 2005; **9**:  
21 320–8.  
22  
23 34 Körner H, Søreide K, Stokkeland PJ, Søreide JA. Diagnostic Accuracy of Serum-  
24 Carcinoembryonic Antigen in Recurrent Colorectal Cancer: A Receiver Operating  
25 Characteristic Curve Analysis. *Ann Surg Oncol* 2006; **14**: 417–23.  
26  
27 35 Søreide K, Traeland JH, Stokkeland PJ, Glomsaker T, Søreide JA, Körner H.  
28 Adherence to national guidelines for surveillance after curative resection of  
29 nonmetastatic colon and rectum cancer: a survey among Norwegian  
30 gastrointestinal surgeons. *Colorect Dis* 2012; **14**: 320–4.  
31  
32 36 Beaver K, Hollingworth W, McDonald R, *et al.* Economic evaluation of a randomized  
33 clinical trial of hospital versus telephone follow-up after treatment for breast  
34 cancer. *Br J Surg* 2009; **96**: 1406–15.  
35  
36 37 Grunfeld E. Follow-up of breast cancer in primary care vs specialist care: results of  
37 an economic evaluation. *Br J Cancer* 1999; **79**: 1227–33.  
38  
39 38 Kimman ML, Dirksen CD, Voogd AC, *et al.* Economic evaluation of four follow-up  
40 strategies after curative treatment for breast cancer: Results of an RCT. *European*  
41 *Journal of Cancer* 2011; **47**: 1175–85.  
42  
43 39 Grunfeld E. Randomized Trial of Long-Term Follow-Up for Early-Stage Breast  
44 Cancer: A Comparison of Family Physician Versus Specialist Care. *Journal of Clinical*  
45 *Oncology* 2006; **24**: 848–55.  
46  
47 40 Editorial. Cancer detection and primary care.....revisited. *Lancet Oncology* 2012;  
48 **13**: 559.  
49  
50 41 Rubin G, Lyratzopoulos G, Abel G, Neal R, Walter F, Hamilton W. Cancer detection in  
51 primary care. *Lancet Oncology* 2012; **13**: e325–6.  
52  
53 42 Lyratzopoulos G, Neal R, Barbiere J, Rubin G. Variation in number of general  
54  
55  
56  
57  
58  
59  
60

1  
2  
3 practitioner consultations before hospital referral for cancer: findings from the  
4 2010 National Cancer Patient Experience Survey in England. *The Lancet Oncology*  
5 2012; **13**: 353–65.  
6

7 43 Cooper G, Kou T, Reynolds H. Receipt of guideline-recommended follow-up in older  
8 colorectal cancer survivors. *Cancer* 2008; **113**: 2029–37.  
9

10 44 Drummond M, Barbieri M, Cook J, *et al.* Transferability of Economic Evaluations  
11 Across Jurisdictions: ISPOR Good Research Practices Task Force Report. *Value in*  
12 *Health* 2009; **12**: 409–18.  
13

14 45 Grunfeld E. Routine followup of breastcancer in primary care: randomised trial. *BMJ*  
15 1996; : 1–5.  
16

17 46 Smith RA. Mathematical models and cost-effective screening strategies for  
18 colorectal cancer. *Canadian Medical Association Journal* 2010; **182**: 1283–4.  
19  
20  
21  
22  
23  
24

## 25 **Figure legends:**

26  
27

### 28 **Figure 1.** Flow of participants.

29 Patients were enrolled in the 2007 NGICG (Norwegian Gastrointestinal Cancer Group, table 1) follow-up  
30 program in both trial arms. The program are divided in 3 months cycles i.e.; clinical examination at 1  
31 (baseline), 3,6,9,12,15,18,21 and 24 months, carcinoembryonic antigen (CEA) measurement at 3 months  
32 intervals, chest x-ray and contrast enhanced liver ultrasound every 6 months, and colonoscopy 1 time  
33 during 24 months (table 1).  
34  
35  
36  
37  
38

### 39 **Figure 2 A, B, C.** Health related quality of life 1-24 postoperative month.

40 EORTC QLQ C30 Global Health, EQ-5D index score and EQ-5D visual analog scale.  
41  
42  
43

### 44 **Figure 3.** Cost of follow-up per cycle.

45 Mean cost of follow-up per patient per 3 month follow-up cycle with error bars (95% confidence  
46 intervals).  
47  
48  
49

### 50 **Figure 4.** Sensitivity analyses of cost driving elements in surveillance.

51 Societal cost per patient (£) for 24-month colon cancer follow-up. Most critical variable in terms of impact  
52 is listed at the top of the graph, and the rest ranked according to their impact thereafter. As unit cost from  
53 the UK, like cost for GP consultation and diagnostic testing, has been reported to be 30-40% higher than  
54 units cost applied in this trial, relevant cost elements were increased accordingly. Cost values for serious  
55 clinical events, metastases surgeries and sick leave were adjusted for baseline characteristics.  
56  
57  
58  
59  
60

1  
2  
3  
4  
5  
6  
7  
8  
9  
10  
11  
12  
13  
14  
15  
16  
17  
18  
19  
20  
21  
22  
23  
24  
25  
26  
27  
28  
29  
30  
31  
32  
33  
34  
35  
36  
37  
38  
39  
40  
41  
42  
43  
44  
45  
46  
47  
48  
49  
50  
51  
52  
53  
54  
55  
56  
57  
58  
59  
60

For peer review only

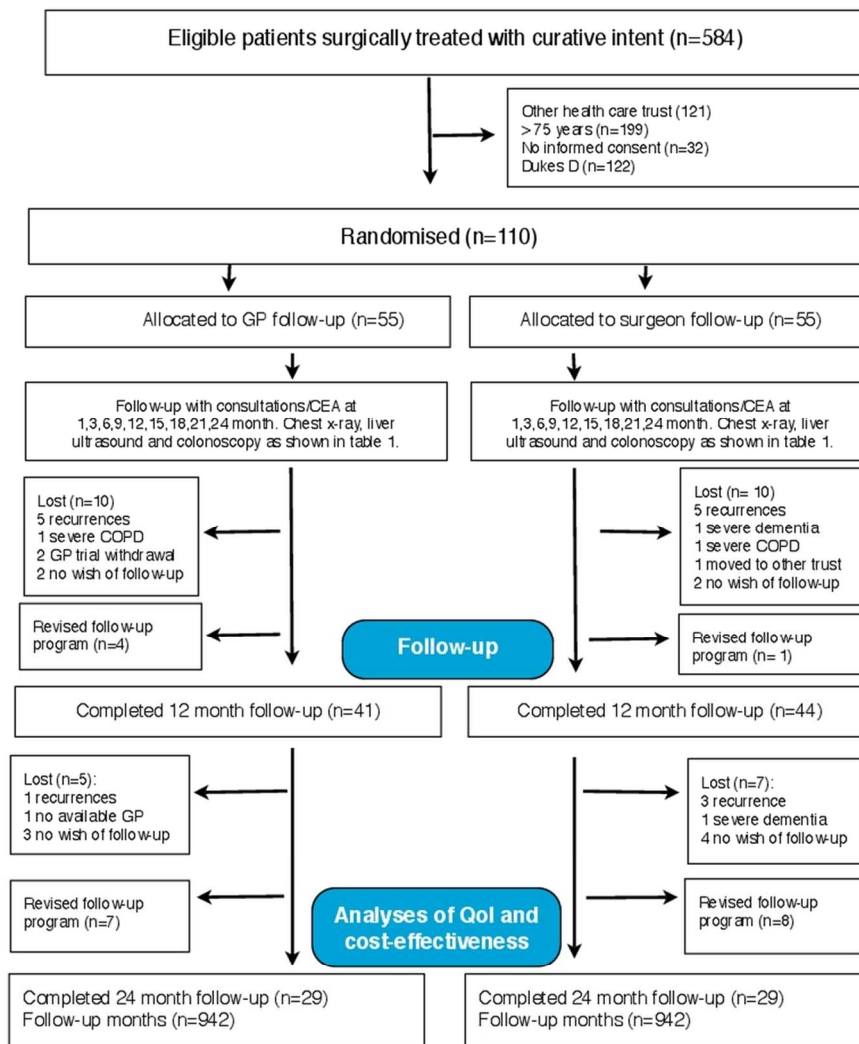

Figure 1. Flow of participants. Patients were enrolled in the 2007 NGICG (Norwegian Gastrointestinal Cancer Group, table 1) follow-up program in both trial arms. The program are divided in 3 months cycles i.e.; clinical examination at 1 (baseline), 3,6,9,12,15,18,21 and 24 months, carcinoembryonic antigen (CEA) measurement at 3 months intervals, chest x-ray and contrast enhanced liver ultrasound every 6 months, and colonoscopy 1 time during 24 months (table 1).

90x116mm (300 x 300 DPI)



1  
2  
3  
4  
5  
6  
7  
8  
9  
10  
11  
12  
13  
14  
15  
16  
17  
18  
19  
20  
21  
22  
23  
24  
25  
26  
27  
28  
29  
30  
31  
32  
33  
34  
35  
36  
37  
38  
39  
40  
41  
42  
43  
44  
45  
46  
47  
48  
49  
50  
51  
52  
53  
54  
55  
56  
57  
58  
59  
60

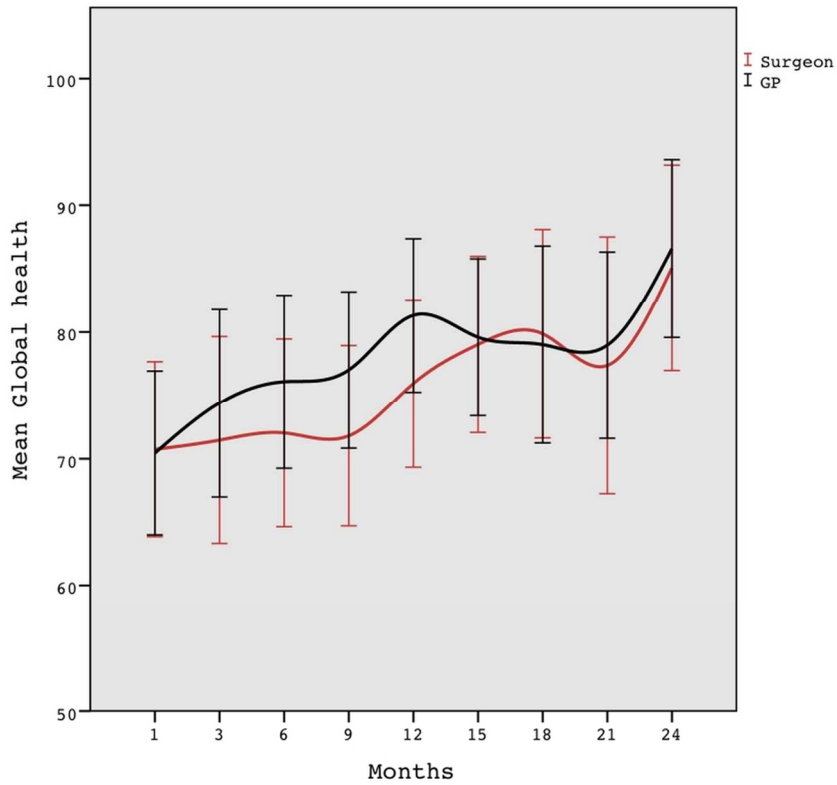

Figure 2 A, B, C. Health related quality of life 1-24 postoperative month. EORTC QLQ C30 Global Health, EQ-5D index score and EQ-5D visual analog scale.

112x90mm (300 x 300 DPI)

view only

1  
2  
3  
4  
5  
6  
7  
8  
9  
10  
11  
12  
13  
14  
15  
16  
17  
18  
19  
20  
21  
22  
23  
24  
25  
26  
27  
28  
29  
30  
31  
32  
33  
34  
35  
36  
37  
38  
39  
40  
41  
42  
43  
44  
45  
46  
47  
48  
49  
50  
51  
52  
53  
54  
55  
56  
57  
58  
59  
60

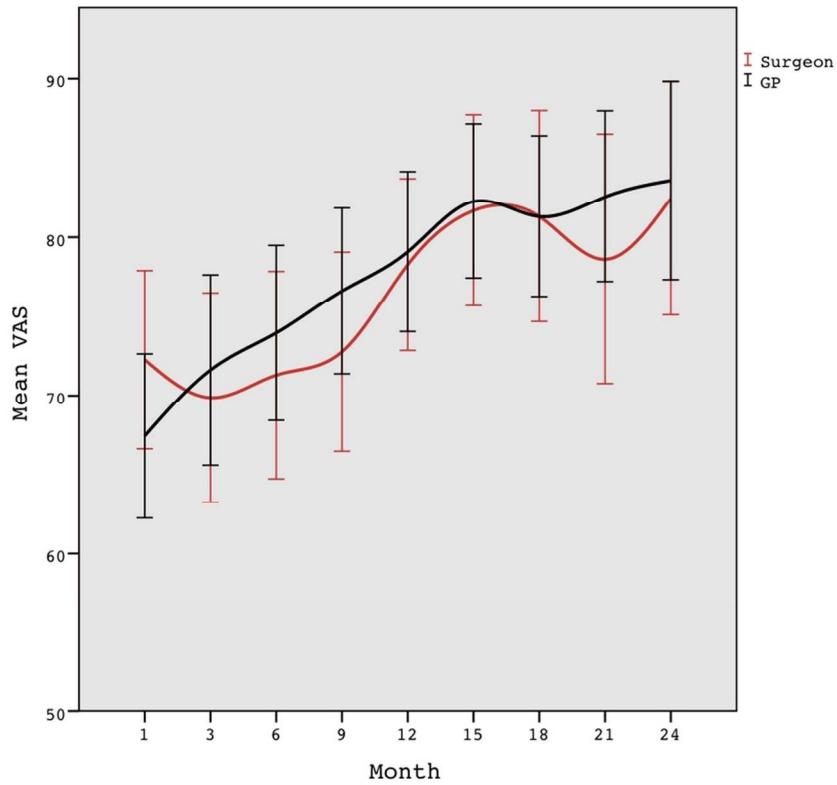

Figure 2 A, B, C. Health related quality of life 1-24 postoperative month. EORTC QLQ C30 Global Health, EQ-5D index score and EQ-5D visual analog scale.

112x90mm (300 x 300 DPI)

View only

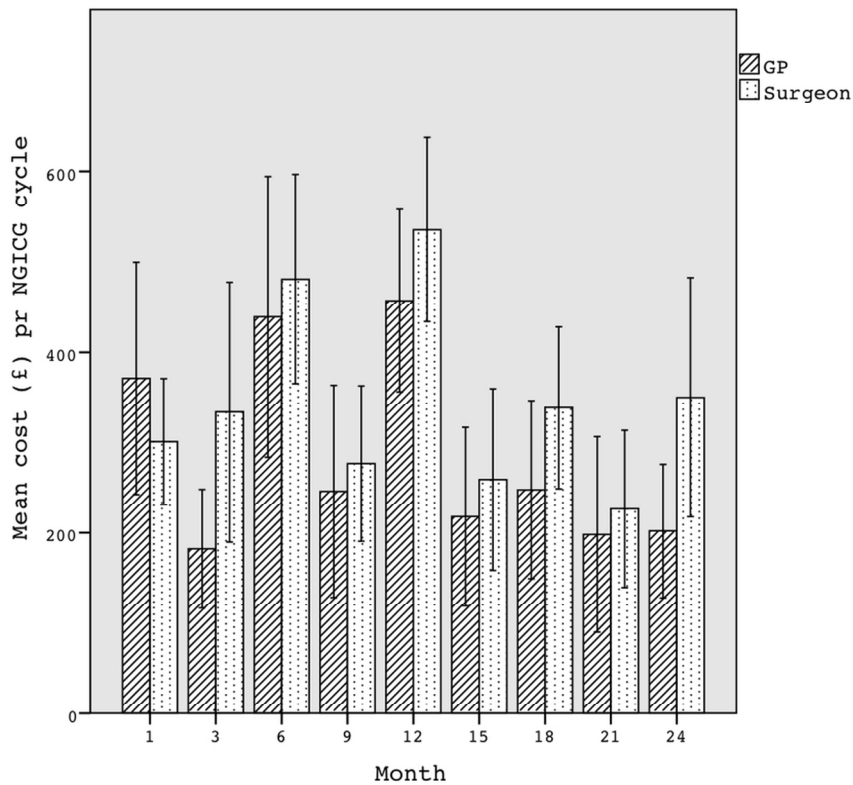

Figure 3. Cost of follow-up per cycle.  
 Mean health care cost of follow-up per patient per 3 month follow-up cycle with error bars (95% confidence intervals).  
 112x90mm (300 x 300 DPI)

View only



## CONSORT 2010 checklist of information to include when reporting a randomised trial\*

| Section/Topic                    | Item No | Checklist item                                                                                                                                                                              | Reported on page No |
|----------------------------------|---------|---------------------------------------------------------------------------------------------------------------------------------------------------------------------------------------------|---------------------|
| <b>Title and abstract</b>        |         |                                                                                                                                                                                             |                     |
|                                  | 1a      | Identification as a randomised trial in the title                                                                                                                                           | 1                   |
|                                  | 1b      | Structured summary of trial design, methods, results, and conclusions (for specific guidance see CONSORT for abstracts)                                                                     | 2                   |
| <b>Introduction</b>              |         |                                                                                                                                                                                             |                     |
| Background and objectives        | 2a      | Scientific background and explanation of rationale                                                                                                                                          | 3-4                 |
|                                  | 2b      | Specific objectives or hypotheses                                                                                                                                                           | 5                   |
| <b>Methods</b>                   |         |                                                                                                                                                                                             |                     |
| Trial design                     | 3a      | Description of trial design (such as parallel, factorial) including allocation ratio                                                                                                        | 4 and 7             |
|                                  | 3b      | Important changes to methods after trial commencement (such as eligibility criteria), with reasons                                                                                          | No changes          |
| Participants                     | 4a      | Eligibility criteria for participants                                                                                                                                                       | 5                   |
|                                  | 4b      | Settings and locations where the data were collected                                                                                                                                        | 4 - 5               |
| Interventions                    | 5       | The interventions for each group with sufficient details to allow replication, including how and when they were actually administered                                                       | 5 - 6               |
| Outcomes                         | 6a      | Completely defined pre-specified primary and secondary outcome measures, including how and when they were assessed                                                                          | 7 - 8               |
|                                  | 6b      | Any changes to trial outcomes after the trial commenced, with reasons                                                                                                                       | No changes          |
| Sample size                      | 7a      | How sample size was determined                                                                                                                                                              | 9                   |
|                                  | 7b      | When applicable, explanation of any interim analyses and stopping guidelines                                                                                                                | 11 - 12             |
| <b>Randomisation:</b>            |         |                                                                                                                                                                                             |                     |
| Sequence generation              | 8a      | Method used to generate the random allocation sequence                                                                                                                                      | 6 - 7               |
|                                  | 8b      | Type of randomisation; details of any restriction (such as blocking and block size)                                                                                                         | 6 - 7               |
| Allocation concealment mechanism | 9       | Mechanism used to implement the random allocation sequence (such as sequentially numbered containers), describing any steps taken to conceal the sequence until interventions were assigned | 6                   |
| Implementation                   | 10      | Who generated the random allocation sequence, who enrolled participants, and who assigned participants to interventions                                                                     | 6                   |
| Blinding                         | 11a     | If done, who was blinded after assignment to interventions (for example, participants, care providers, those                                                                                | No blinding         |

|                                                      |     |                                                                                                                                                   |                               |
|------------------------------------------------------|-----|---------------------------------------------------------------------------------------------------------------------------------------------------|-------------------------------|
|                                                      |     | assessing outcomes) and how                                                                                                                       |                               |
|                                                      | 11b | If relevant, description of the similarity of interventions                                                                                       | 5 and table 1                 |
| Statistical methods                                  | 12a | Statistical methods used to compare groups for primary and secondary outcomes                                                                     | 11                            |
|                                                      | 12b | Methods for additional analyses, such as subgroup analyses and adjusted analyses                                                                  | Economical analyses 9-10      |
| <b>Results</b>                                       |     |                                                                                                                                                   |                               |
| Participant flow (a diagram is strongly recommended) | 13a | For each group, the numbers of participants who were randomly assigned, received intended treatment, and were analysed for the primary outcome    | Figure 1                      |
|                                                      | 13b | For each group, losses and exclusions after randomisation, together with reasons                                                                  | Figure 1                      |
| Recruitment                                          | 14a | Dates defining the periods of recruitment and follow-up                                                                                           | 4                             |
|                                                      | 14b | Why the trial ended or was stopped                                                                                                                | 12                            |
| Baseline data                                        | 15  | A table showing baseline demographic and clinical characteristics for each group                                                                  | Table 3                       |
| Numbers analysed                                     | 16  | For each group, number of participants (denominator) included in each analysis and whether the analysis was by original assigned groups           | 12                            |
| Outcomes and estimation                              | 17a | For each primary and secondary outcome, results for each group, and the estimated effect size and its precision (such as 95% confidence interval) | Table 4 and 5                 |
|                                                      | 17b | For binary outcomes, presentation of both absolute and relative effect sizes is recommended                                                       | Not relevant                  |
| Ancillary analyses                                   | 18  | Results of any other analyses performed, including subgroup analyses and adjusted analyses, distinguishing pre-specified from exploratory         | 18 (time to diagnoses of SCE) |
| Harms                                                | 19  | All important harms or unintended effects in each group (for specific guidance see CONSORT for harms)                                             | Figure 1, table 4 and 5       |
| <b>Discussion</b>                                    |     |                                                                                                                                                   |                               |
| Limitations                                          | 20  | Trial limitations, addressing sources of potential bias, imprecision, and, if relevant, multiplicity of analyses                                  | 19-20                         |
| Generalisability                                     | 21  | Generalisability (external validity, applicability) of the trial findings                                                                         | 20                            |
| Interpretation                                       | 22  | Interpretation consistent with results, balancing benefits and harms, and considering other relevant evidence                                     | 18-19                         |
| <b>Other information</b>                             |     |                                                                                                                                                   |                               |
| Registration                                         | 23  | Registration number and name of trial registry                                                                                                    | 2                             |
| Protocol                                             | 24  | Where the full trial protocol can be accessed, if available                                                                                       | Reference 15                  |
| Funding                                              | 25  | Sources of funding and other support (such as supply of drugs), role of funders                                                                   | 23                            |

1  
2  
3  
4  
5  
6  
7  
8  
9  
10  
11  
12  
13  
14  
15  
16  
17  
18  
19  
20  
21  
22  
23  
24  
25  
26  
27  
28  
29  
30  
31  
32  
33  
34  
35  
36  
37  
38  
39  
40  
41  
42  
43  
44  
45  
46  
47  
48  
49

\*We strongly recommend reading this statement in conjunction with the CONSORT 2010 Explanation and Elaboration for important clarifications on all the items. If relevant, we also recommend reading CONSORT extensions for cluster randomised trials, non-inferiority and equivalence trials, non-pharmacological treatments, herbal interventions, and pragmatic trials. Additional extensions are forthcoming: for those and for up to date references relevant to this checklist, see [www.consort-statement.org](http://www.consort-statement.org).

For peer review only

1  
2  
3  
4  
5  
6  
7 **Cost-effectiveness and quality of life in surgeon versus general practitioner**  
8 **organised colon cancer surveillance**~~General practitioner organised follow-up~~  
9 ~~after curative colon cancer resection is not inferior to surgeon organised follow-~~  
10 ~~up.~~ **A randomised controlled trial.**

11  
12 Knut Magne Augestad, *leader health services research*<sup>1,2,7</sup>, Jan Norum, *professor in*  
13 *clinical oncology*<sup>3,7</sup>, Stefan Dehof, *consultant in general surgery*<sup>4</sup>, Ranveig Aspevik,  
14 *consultant in digestive surgery*<sup>4</sup>, Unni Ringberg, *general practitioner*<sup>5</sup>, Torunn Nestvold,  
15 *consultant in digestive surgery*<sup>6</sup>, Barthold Vonon, *chief medical executive officer*<sup>6,7</sup>, Stein  
16 Olav Skrøvseth, *senior scientist in statistics*<sup>1</sup>, Rolv-Ole Lindsetmo, *professor in digestive*  
17 *surgery*<sup>2,7</sup>.

18  
19  
20  
21  
22  
23 <sup>1</sup> Norwegian National Center of Integrated Care and Telemedicine, University Hospital of  
24 North Norway, Tromsø, Norway.

25  
26 <sup>2</sup> Department of Gastrointestinal Surgery, University Hospital of North Norway, Tromsø,  
27 Norway.

28  
29 <sup>3</sup> Northern Norway Regional Health Authority trust, Bodø, Norway.

30  
31 <sup>4</sup> Department of Surgery, Helgeland Hospital, Mo i Rana, Norway.

32  
33 <sup>5</sup> Nordbyen Primary Care Office, Tromsø, Norway.

34  
35 <sup>6</sup> Nordland Hospital Trust, Bodø, Norway.

36  
37  
38  
39  
40  
41  
42  
43  
44 <sup>7</sup> Institute of Clinical Medicine, Faculty of Health Sciences, University of Tromsø, Norway.

45  
46  
47  
48  
49  
50  
51  
52  
53  
54  
55  
56  
57  
58  
59  
60

Word count: 3650

**Correspondence to:**

Knut Magne Augestad, MD  
Norwegian National Center of Integrated Care and Telemedicine  
University Hospital of North Norway  
9037 Breivika, Norway  
Phone: 0047 97499442

e-mail: knut.magne.augestad@telemed.no

## Abstract

**Objective:** To assess whether colon cancer follow-up can be organised by general practitioners (GPs) without decline in patient quality of life (QoL), increase in cost, or increase in time to cancer diagnoses, compared to hospital follow-up.

**Design:** Randomised controlled trial.

**Setting:** Northern Norway Health Authority Trust, 4 trusts, 11 hospitals and 88 local communities.

**Participants:** Patients surgically treated for colon cancer, hospital surgeons and community GPs.

**Intervention:** 24 month follow-up according to national guidelines at the community general practitioner office. To ensure a high follow-up guideline adherence, a decision support tool for patients and GPs were used.

**Main outcome measures:** Primary outcome were QoL, measured by the global health scale of EORTC-QLQC30, and EQ-5D. Secondary outcomes were cost-effectiveness and time to cancer diagnoses.

**Results:** 110 patients were randomised to intervention (n=55) or control (n=55), and followed by 78 GPs (942 follow-up months) and 70 surgeons (942 follow-up months), respectively. Compared to baseline, there was a significant improvement in postoperative QoL (p=0.003), but no differences between groups were revealed (mean difference at 1,3,6,9,12,15,18,21 and 24 month follow-up appointments): Global Health;  $\Delta - 2.23$ , p=0.20; EQ-5D index;  $\Delta - 0.10$ , p=0.48, EQ-5D VAS;  $\Delta - 1.1$ , p=0.44. There were no differences in time to recurrent cancer diagnosis (GP 35 days vs. surgeon 45 days, p=0.46), 14 recurrences were detected (GP 6 vs. surgeon 8) and 7 metastases surgeries performed (GP 3 vs. surgeon 4). The follow-up program initiated 1186 health care contacts (GP 678 vs. surgeon 508), 1105 diagnostic tests (GP 592 vs. surgeon 513) and 778 hospital travels (GP 250 vs. surgeon 528). GP organised follow-up was associated with societal cost savings (£8233 vs. £9889, p<0.001).

**Conclusion:** GP organised follow-up was associated with no decline in QoL, no increase in time to recurrent cancer diagnosis and cost savings.

**Trial registration:** ClinicalTrials.gov identifier NCT00572143.



## Article summary:

### Article focus:

- Intensive follow-up after curative colon cancer resection is associated with improved overall survival of 5-10%.
- No international consensus exist regarding the detailed content of a follow-up program for colorectal cancer .
- Quality of life (QoL), cost-effectiveness and patient safety in a GP organised follow-up program is unknown.

### Key messages:

- GP organised colon cancer follow-up is associated with no decline in QoL, no increase in time to recurrent cancer diagnosis, and ~~significant~~ cost savings.

### Strengths and limitations of this trial:

- Intention to treat analyses with high adherence to the national follow-up program.
- First trial assessing cost-effectiveness of a GP organised colon cancer follow-up program.
- The trail was stopped after 1884 patient follow-up months due to no impact of the intervention on global health status.
- 52% of included patients were followed for two years. This limits the interpretation of recurrence, as 80% of colon cancer recurrences occurs within three years.
- ~~The trial was stopped after 1884 follow-up months due to no impact of the primary intervention on QoL.~~

### Background

Colon cancer is the third most common cancer in the western world, and surgery is the only curative treatment. Around one-third of those resected will experience recurrent disease with less than two years expected survival.<sup>1,2</sup> Despite the generally poor outcomes among patients with recurrent disease, most patients treated with curative intent are included in some form of surveillance program involving periodic evaluation. Reviews comparing various follow-up programs have suggested that more intensive

1  
2  
3  
4  
5  
6  
7  
8  
9  
10  
11  
12  
13  
14  
15  
16  
17  
18  
19  
20  
21  
22  
23  
24  
25  
26  
27  
28  
29  
30  
31  
32  
33  
34  
35  
36  
37  
38  
39  
40  
41  
42  
43  
44  
45  
46  
47  
48  
49  
50  
51  
52  
53  
54  
55  
56  
57  
58  
59  
60

strategies tend to increase five-year survival by detecting relapse about six months earlier than less intensive strategies — at a point where the patient will be more likely to be considered a candidate for potentially curative metastases surgery.<sup>2-4</sup> However, wide consensus has not been reached regarding just what an intensive follow-up strategy should entail.<sup>5-8</sup> New surveillance trials in progress are not likely to fully settle the issue either.<sup>9-12</sup> What none of the available clinical recommendations for follow-up have addressed adequately is the *setting* where this follow-up should occur: conducted by specialists who originally treated the cancer at hospitals, or in the offices of local general practitioners (GP's).<sup>2</sup> Increasingly, the benefits of greater involvement of primary care providers in the ~~ongoing~~ management of chronic illnesses are recognised.<sup>13</sup> Level of follow-up care may greatly influence quality of life and costs, especially in rural areas ~~with long~~ distances to travel for hospital services. However, such considerations must be balanced against the imperative that colon cancer survivors receive the best care available. Recently, the UK's National Cancer Survivorship Initiative recognised the need to develop new models of cancer care that support patient self care, care planning and making the best out of resources.<sup>14</sup> In Norway, similar national initiatives have been launched. In this trial, we tested the main hypothesis that colon cancer patients followed-up by their GP would experience similar or higher scores on quality of life measures at a lower cost than alternative hospital controls. The other aims were to test for differences of harms and benefits in a follow-up program, i.e. rate of serious clinical events (SCE), ~~rate of false positive tests~~, time to diagnosis of SCE and cancer recurrence, and frequency of metastases surgery.

## Methods

This was a randomised controlled trial ~~with institutional ethical approval and patient written consent~~ carried out in North Norway Health Authority trust using a previously published protocol.<sup>15</sup> The first patient was included 1<sup>st</sup> of June 2007, the last patient included 15<sup>th</sup> of December 2011. ~~Patients were followed until June 2012~~ Interim analyses were performed in June 2012.

### Ethics and trial registration

The Regional Committee for Medical Research Ethics, North Norway approved this protocol in 2006 (P REK NORD 79/ 2006). Patients provided written consent before

1  
2  
3  
4  
5  
6  
7 entering the trial. The trial was registered in ClinicalTrials.gov with identifier  
8 NCT00572143. Due to organisational delay the trial was registered 11<sup>th</sup> of December  
9 2007. specified study start in ClinicalTrials.gov is June 2007.

10  
11  
12  
13  
14 **Participating patients inclusion and exclusion criteria, hospitals, primary and**  
15 **secondary care professionals**

16  
17  
18  
19 Inclusion criteria were Patients were eligible if they were aged less than 75 years and  
20 with had recent surgery for colon cancer with Dukes' stage A, B or C. Patients receiving  
21 postsurgical adjuvant chemotherapy (some Dukes' B and all Dukes' C) were also eligible.

22  
23 Exclusion criteria were patients older than 75 years old, patient belonging to health care  
24 trust not participating in the trial, not able to provide informed consent and Dukes D.

25  
26  
27 **Hospitals, primary and secondary care professionals**

28  
29 Three local hospitals and one university hospital participated. Approximately 100  
30 patients with colon cancer are surgically treated annually at these four hospitals. All 550  
31 GPs in the region received written information, 448 GPs consented to participate in the  
32 trial (figure 1).

33  
34  
35  
36 **Objective and hypotheses**

37 The primary objective was to compare patients' quality of life and costs of follow-up by  
38 their local GP or at the surgical outpatient clinic. The primary hypothesis was that  
39 patients followed-up by their GP would experience similar or better QoL scores (on the  
40 global health scale) at a lower cost. The secondary objective was to test whether the  
41 incidence of serious clinical events (SCE) would be similar for patients followed- up by  
42 their GP or hospital specialist (control group), secondary hypothesis being that patients  
43 followed-up by their GP would have no delay in detection of relapse and the same  
44 frequency of SCEs as controls.

45  
46  
47  
48  
49  
50 **Description of intervention**

51 We defined this as a complex intervention, consisting of several interconnecting parts. <sup>16</sup>  
52 To ensure high follow-up guideline adherence by patients allocated to GP follow-up, we  
53  
54  
55

Formatted: Space After: 10 pt, No widow/orphan control, Don't adjust space between Latin and Asian text, Don't adjust space between Asian text and numbers

used a decision support tool as part of the intervention.<sup>17</sup> Thus, the intervention consisted of the following parts:

1. *GP organised colon cancer follow-up*: The patients were referred to their general practitioner for postoperative follow-up according to national guidelines (table 1). Information was given about surgery, any complications, Dukes' staging, time and location of chemotherapy (for Dukes' C patients), and risk of recurrence.
2. *Patient decision-support pamphlet*: Received at the baseline consultation, containing information about; a) Their own disease, tumour stage and risk of recurrence; b) The aim and objective of the trial; b) The current national follow-up guidelines, i.e. schedule and location of CEA measurements, chest x-ray, contrast enhanced liver ultrasound, colonoscopy and clinical examination; b) A detailed description of signs and symptoms of potential recurrence of colon cancer; c) In case of a serious clinical event between appointments, relevant phone numbers and contact information was given.
3. *GP decision-support pamphlet*: Sent at time of baseline appointment to all GPs that had a patient allocated to their practice. This pamphlet contained similar information as the patient received i.e. information about follow-up guidelines, signs and symptoms of recurrence and behavioural strategy in the case suspicion of a recurrence. In case of questions regarding the follow-up relevant contact information was given.

Patients allocated to GP follow-up could be referred back to any surgical clinic at any time during the study period. Similarly, patients in the hospital follow-up group (controls) were free to consult their GP at any time. National follow-up guidelines were applied in both study arms and patients were followed for up to two years. The follow-up period consisted of nine follow-up cycles with regular clinical examinations, CEA measurement, chest x ray, contrast enhanced liver ultrasound and colonoscopy (table 1).

Table 1. Norwegian Gastrointestinal Cancer Group (NGICG) 2007 follow-up program.

| Examination/test | Follow-up cycle (months postoperative) |
|------------------|----------------------------------------|
|------------------|----------------------------------------|

|                                           | 1 | 3 | 6 | 9 | 12 | 15 | 18 | 21 | 24 | 30 | 36 | 42 | 48 | 54 | 60 |
|-------------------------------------------|---|---|---|---|----|----|----|----|----|----|----|----|----|----|----|
| Chest x-ray                               |   |   | X | X |    | X  |    | X  |    | X  |    | X  |    | X  |    |
| Contrast enhanced liver ultrasound (CEUS) |   |   | X | X |    | X  |    | X  |    | X  |    | X  |    | X  |    |
| Colonoscopy                               |   |   |   |   | X  |    |    |    |    |    |    |    | X  |    |    |
| CEA measurement                           | X | X | X | X | X  | X  | X  | X  | X  | X  | X  | X  | X  | X  | X  |
| Clinical examination                      | X | X | X | X | X  | X  | X  | X  | X  | X  | X  | X  | X  | X  | X  |

Red: Length of trial participation (24 months, 9 follow-up cycles). CEA: carcinoembryonic antigen.

### Randomisation

At study entry, patients were seen for a baseline visit by a local trial investigator at the hospital where they received surgical treatment approximately 3-4 weeks postoperatively. At this visit, a clinical examination was performed and information about the histology and results of the surgery was shared with each patient. If the patients provided informed consent, they were randomised to follow-up either by their GP (intervention) or at the surgical outpatient clinic (controls) using a web-based randomisation service managed by the Norwegian University of Science and Technology ([www.ntnu.no](http://www.ntnu.no)). The randomisation ratio was 1:1, patients were stratified according to the Dukes' staging (A,B,C) and whether they had a stoma. The local trial investigator was not involved in the subsequent follow-up appointments in any way. Recruited patients were not informed about other patients recruited in the same trial. Similarly, no information regarding trial progress and allocation was revealed to participating GPs or surgeons. However, as GP organised follow-up represented a new practice, blinding was not possible in the intervention arm.

### Primary outcome measures

#### Quality of life

**Primary outcome measure in this trial was the global health status on the EORTC QLQ C-30 questionnaire.** QoL measurements were collected at baseline and 3,6,9,12,15,18,21 and 24 months, i.e.:

*The European Organization for Research and Treatment of Cancer QoL Questionnaire (EORTC QLQ C-30):* EORTC QLQ C-30 incorporates nine multi-item scales: five functional scales (physical, role, cognitive, emotional and social); three symptom scales (fatigue,

1  
2  
3  
4  
5  
6  
7 pain, nausea/vomiting); and a global health status/QoL scale. Six single-item scales are  
8 also included (dyspnoea, insomnia, appetite loss, constipation, diarrhoea and financial  
9 difficulties).<sup>18</sup> ~~Primary outcome measure in this trial was the global health status.~~

11  
12 *The EuroQol-5D (EQ-5D<sup>TM</sup>; EuroQol Group, Rotterdam, The Netherlands):* Is a  
13 standardized generic instrument employed to measure of health outcome. EQ-5D  
14 measures five dimensions of health-related QoL (HRQoL): mobility, self-care, usual  
15 activities, pain/discomfort and anxiety/depression. Each dimension is rated at three  
16 levels: no problems (1), some problems (2) and major problems (3).<sup>19</sup> Based on  
17 preferences elicited from a general population, EQ-5D health states (e.g. 1-1-2-1-3) may  
18 be converted into utility scores (= index scores, IS). In this trial we used preferences  
19 elicited from a UK population, as no similar Norwegian preferences exist.<sup>20</sup>  
20 EQ Visual Analogue Scale (EQ VAS) records the respondent's self-rated health status on  
21 a vertically graduated (0-100) visual analogue scale.  
22  
23  
24  
25  
26  
27  
28  
29

### 30 **Secondary outcome measures**

#### 31 *Cost-effectiveness*

32  
33 Resources used (baseline to 24 months) were registered prospectively based on reports  
34 by the patients and on hospital EMR review. The cost elements included costs related to  
35 hospital visits, GP visits, laboratory tests, radiology examinations, colonoscopy,  
36 examinations due to suspected relapse (radiology, colonoscopy, CT of thorax and/or  
37 abdomen, PET scan), treatment of recurrence, travelling/transportation, production  
38 losses, co-payments and other patient/family expenses.  
39  
40  
41  
42

#### 43 *Time to cancer diagnoses*

44  
45 Time to cancer diagnoses was defined as the time from occurrence of a serious clinical  
46 event (SCE, dated in the GP referral or hospital EMR record) until the date of diagnoses  
47 of a ~~cancer recurrence~~SCE. A ~~serious clinical event~~ (SCE<sub>s</sub>) was defined as an episode  
48 where cancer recurrence was suspected. A SCE can be triggered by either symptoms  
49 reported (at follow-up or in between follow-up), clinical findings at follow-up or findings  
50 by screening test. ~~A SCE~~Syptoms and clinical findings initiating a diagnostic check-up  
51 ~~was~~ere defined as: Cancer suspect lesion revealed at colonoscopy, increase in CEA  
52  
53  
54  
55  
56  
57  
58  
59  
60

1  
2  
3  
4  
5  
6  
7 measurements shown by repeated measurements, blood in stool detected by the  
8 Hemofec (FOB) test, unexplained abdominal pain, unexplained weight loss of 5 kg  
9 during the last three months, cancer-suspect lesions detected by rectal examination,  
10 palpable lymphadenopathy, metastatic suspect lesions shown by chest x-ray,  
11 ultrasound of liver or CT scan, cancer suspect findings at clinical examination,  
12 occurrence of cancer related symptoms.  
13  
14

### 15 16 17 **Data collection**

18 At the baseline appointment, patients recruited received nine questionnaires (as part of  
19 the patient decision-support pamphlet) corresponding with the nine follow-up cycles  
20 (table 1). The questionnaires contained questions about QoL, patient satisfaction, and  
21 cost and resource utilisation. Questionnaires were returned by mail every three months  
22 by the patients to the trial centre until 24 months postoperatively. These questionnaires  
23 were optically readable, being consecutively registered in the trial database. A research  
24 assistant was responsible for data collection, database input and patient reminders  
25 when missing questionnaires. The reminders were sent to participating patients when  
26 the questionnaires were 3 months overdue the estimated follow-up schedule. All  
27 questionnaires were dated and we could thus monitor trial progression. In case of  
28 missing information about cost elements we either reviewed the hospital EMR, or  
29 performed telephone interview with participating surgeons, GPs or patients.  
30  
31  
32  
33  
34  
35

### 36 37 **Sample size calculation**

38 In June 2007 sample size calculations were based on a significance level of 5% and  
39 power set at 80%, this indicated that we needed 136 patients to detect a 10 units QoL  
40 difference (i.e. a small to moderate improvement) on EORTC QLQ C-30 Global Health  
41 score with a standard deviation of 20. Definition of “a small to moderate improvement  
42 on QoL” (i.e 10 units on the global health score), and standard deviation estimates of  
43 QoL (colon cancer patients with localised disease), were retrieved from previous  
44 published publications.<sup>21,22</sup>  
45  
46  
47  
48  
49

### 50 51 **Economic analysis**

52 BMJ guidelines for economic analyses alongside randomised controlled trials were  
53 employed.<sup>23</sup> As the trial revealed no difference in quality of life, a cost-minimisation  
54  
55

1  
2  
3  
4  
5  
6  
7  
8  
9  
10  
11  
12  
13  
14  
15  
16  
17  
18  
19  
20  
21  
22  
23  
24  
25  
26  
27  
28  
29  
30  
31  
32  
33  
34  
35  
36  
37  
38  
39  
40  
41  
42  
43  
44  
45  
46  
47  
48  
49  
50  
51  
52  
53  
54  
55  
56  
57  
58  
59  
60

analysis was carried out. The economic evaluation had a societal perspective. A 3% discount rate was used to discount future costs and benefits. For this publication cost elements have been converted from Norwegian kroner (NOK) into British Pounds at the rate of GBP 1£ = NOK 9,39 NOK as of the Norwegian National Bank the 27<sup>th</sup> of June 2012.

Details of the unit costs assigned to health care resource use are shown in table 2.

Economic evaluation data are invariably positively skewed, and it requires an alternative analysis. We used a bootstrapping technique, which makes no assumptions regarding the equality, variance or shape of the distribution, and takes into account skewness.<sup>24,25</sup> To adjust for skewness cost were bootstrapped with 1000 replications to estimate bias corrected confidence intervals. The bootstrapping technique was undertaken using IBM SPSS Statistics v 19.0

A one-way sensitivity analysis was used to assess the robustness of the results and impact of variance. Societal cost of 24-month follow-up was assessed for low, base and high input values, and the result expressed as a many inputs, one output tornado chart. To increase generalizability of cost between countries, unit costs from the UK were included in the sensitivity analyses. Cost for GP consultation and diagnostic testing, has been reported to be 30-40% higher than units cost applied in this trial and relevant cost elements were increased accordingly in sensitivity analyses.<sup>26,24</sup>

Table 2. Details of the unit costs assigned to health care resource use data.

| Variable                                       | Unit cost (£)*          | Sensitivity analyses |
|------------------------------------------------|-------------------------|----------------------|
| <b>Cost of travel</b>                          |                         | ± 25%                |
| Mean costs hospital travel                     | 88 <sup>a</sup>         |                      |
| Hotel overnight                                | 74 <sup>b</sup>         |                      |
| Private car rates                              | 0.2 per km <sup>c</sup> |                      |
| Parking                                        | 10.6 <sup>b</sup>       |                      |
| Taxi                                           | 1.3 per km <sup>c</sup> |                      |
| Bus                                            | 2.6 <sup>c</sup>        |                      |
| <b>Cost of GP consultation</b>                 |                         | ± 25- 40%            |
| GP consultation 20 min                         | 18.5 <sup>d</sup>       |                      |
| Phone consultation GP 10 min                   | 5.3 <sup>d</sup>        |                      |
| Emergency consultation GP 30 min               | 26 <sup>d</sup>         |                      |
| <b>Cost of surgeon outpatient consultation</b> |                         | ± 25-40%             |
| Surgeon outpatient consultation 30 min         | 69 <sup>e</sup>         |                      |
| Phone consultation surgeon 15 min              | 10.6 <sup>f</sup>       |                      |
| Emergency outpatient consultation 30 min       | 69 <sup>e</sup>         |                      |
| <b>Cost of follow-up tests</b>                 |                         | ± 25-40 %            |
| Blood samples                                  | 5 <sup>d</sup>          |                      |



|                                               |                    |       |
|-----------------------------------------------|--------------------|-------|
| Chest-X-ray                                   | 25 <sup>g,h</sup>  |       |
| Contrast enhanced ultrasound liver            | 153 <sup>g,h</sup> |       |
| CT abdomen                                    | 105 <sup>g,h</sup> |       |
| CT thorax                                     | 105 <sup>g,h</sup> |       |
| Colonoscopy                                   | 293 <sup>e,h</sup> |       |
| PET scan                                      | 2662 <sup>g</sup>  |       |
| <b>Cost related to sick leave</b>             |                    | ± 25% |
| Governmental reimbursement 1 day work absence | 102 <sup>i</sup>   |       |
| <b>Costs related to metastases surgery</b>    |                    | ± 25% |
| Cost of abdominal surgery                     | 14176 <sup>e</sup> |       |
| Cost of liver surgery                         | 11596 <sup>e</sup> |       |
| Cost of lung surgery                          | 13061 <sup>e</sup> |       |

\* Exchange rate 29<sup>th</sup> of June 2012: 1 £ = 9.36 Norwegian Kroner:

[www.dnb.no/en/currencylist?la=EN&site=DNB\\_NO](http://www.dnb.no/en/currencylist?la=EN&site=DNB_NO)

<sup>a</sup> Personal communication North Norwegian Health Administration (JN): 5 400 000 NOK budgeted annual travel expenses/950 000 annual patient travels = 88 £ per travel

<sup>b</sup> Local data.

<sup>c</sup> Norwegian National Bureau of Patient Travels: <http://www.pasientreiser.no/andre-spraak/english>.

<sup>d</sup> The Norwegian Medical Association: Norwegian Policy Document for Governmental Reimbursements in Primary Care (Fastlegetariffen) 2011: [www.legeforeningen.no/normaltariff/Fastlegetariff\\_2010.pdf](http://www.legeforeningen.no/normaltariff/Fastlegetariff_2010.pdf).

*Cost of GP consultation:* 136 NOK (20 min consultation) + 386 NOK per patient annually. Assuming 10 consultations per patient annually = 38 NOK/consultation. In total 174 NOK per consultation = 18.5 £.

<sup>e</sup> Norwegian Health Authorities. Reimbursement and DRG weighting in Norwegian Hospitals 2012:

<http://www.helsedirektoratet.no/publikasjoner/regelverk-innsatsstyrte-finansiering-2012/Sider/default.aspx>.

*1 DRG weight:* 38209 NOK. *Surgeon outpatient consultation (day and night-time):* DRG 923 O, weight 0.017.

*Colonoscopy:* DRG 710 O, weight 0.072. *Abdominal surgery:* DRG 170, weight 3.484. *Liver surgery:* DRG 201, weight 2.850. *Lung surgery:* DRG 76, weight 3.21

<sup>f</sup> Statistics in Norway 2011: Average annual salary 750 000 NOK (80 000 £) hospital consultant.

<sup>g</sup> Cost rates Department of Radiology and Nuclear Medicine University Hospital North Norway.

<sup>h</sup> Korner H, Soreide K, Stokkeland PJ, Soreide JA. Systematic follow-up after curative surgery for colorectal cancer in Norway: a population-based audit of effectiveness, costs, and compliance. *J Gastrointest Surg* 2005 Mar;9(3):320-8.

<sup>i</sup> Estimated from a median income of 350 000 NOK/year/patient as reported by patient subsample in regular work at time of surgery.

## Statistics

Descriptive statistics were performed by percentages, 2x2 contingency tables, Chi Square, Fisher Exact test and t-test. The base case analyses (n=110, 600 complete follow-up questionnaires/cycles) were performed on intention to treat principle. Treatment arms were compared with respect to potential covariates using continuous and categorical univariable analyses. The main analyses examined whether differences in outcome between baseline, 3, 6, 9, 12, 15, 18, 21 and 24 months existed in all QoL outcome measures (EORTC QLQ C-30 and EQ-5D). A general linear model was employed, where time (1-24 months) and intervention group (GPs versus Surgeon) were predictors in analyses of variance (between groups ANOVA). Missing items in a form were treated as missing and when missing forms, missing data were imputed

1  
2  
3  
4  
5  
6  
7 imputed by the last observation carried forward (LOCF). Conditional power (CP) was  
8 defined as the chance of getting statistically significant results at the end of the trial  
9 given the data so far. <sup>27,28,25,26</sup> We defined a CP < 15% as a sufficient threshold to stop  
10 early.<sup>29,27</sup> Results were expressed as mean differences for continuous outcomes with  
11 corresponding standard deviations (SD), 95% confidence intervals, and associated p-  
12 values. P-values were reported with two decimal places with p-values less than 0.001  
13 reported as p < 0.001. For all tests we used p = 0.05 level of significance. All analyses  
14 were performed with IBM SPSS Statistics v 19.0 (IBM Company SPSS 2010) and  
15 Microsoft Excel for Mac 2011.  
16  
17  
18  
19

## 20 Results

21 110 patients surgically treated for colon cancer met the inclusion criteria and agreed to  
22 participate (figure 21). The control and intervention group were matched at baseline for  
23 demographic and medical characteristics and there were no significant differences  
24 between groups (table 3).  
25  
26  
27

### 28 Trial flow and dropouts

29 During the follow-up period 628 follow-up cycles (i.e 1884 follow-up months; GP 942  
30 months vs. surgeon 942 months) were performed (GP 314 cycles vs. surgeon 314  
31 eyes). 854 patients (75%) (GP 41 vs. surgeon 44) were followed for 12 months, 58  
32 patients (52%) (GP 29 vs. surgeon 29) were followed for 24 months. Eleven patients  
33 withdrew during trial due to no wish of follow-up (GP 5 vs. surgeon 6), 20 patients were  
34 transferred to a new follow-up program (GP 9 vs. surgeon 11). 32 patients were defined  
35 as lost (surgeon 17 vs. GP 15), of those 14 patients had cancer recurrence (surgeon 8 vs.  
36 GP 6). 20 patients (surgeon 9 vs. GP 11) were transferred to the new national colon  
37 cancer surveillance program (figure 1).  
38  
39  
40  
41  
42  
43  
44

### 45 Response rate

46 We received 636 of the expected 657 questionnaires (response rate 96%), of those 600  
47 (91%) questionnaires (GP 299 vs. surgeon 301) were included in final cost and QoL  
48 analyses. 21 (4%) of questionnaires (surgeon 11 vs. GP 10) were not returned and 36  
49 questionnaires (surgeon 18 vs. GP 18) were excluded from analyses due to insufficient  
50 identification.  
51  
52  
53  
54  
55  
56

### Interim analyses

New national colon cancer surveillance guidelines were gradually implemented from 2010, with different frequency of consultations (3 month vs. 6 months interval) and radiological modalities (chest x ray vs. CT chest).<sup>7</sup> This could bias the cost-effectiveness and QoL analyses, and an interim analysis was performed in June 2012 (80% of pre planned recruitment, 1884 follow-up months). There was at this point 4% probability (i.e. conditional power) of showing a significant impact of the intervention on QoL global health score, which meant that further trial continuation were not justified.

28 questionnaires (5%) were excluded from analyses (GP 15 vs. surgeon 13) due to incomplete data or missing information, i.e. 600 follow-up questionnaires (95%) (GP 299 vs. surgeon 301) were included in analyses. 84 patients (75%) (GP 41 vs. surgeon 44) were followed for 12 months, 58 patients (52%) (GP 29 vs. surgeon 29) were followed for 24 months. Eleven patients withdrew during trial due to no wish of follow-up (GP 5 vs. surgeon 6), 20 patients were transferred to a new follow-up program (GP 9 vs. surgeon 11).

Implementation of new national colon cancer follow-up guidelines triggered an interim analysis in June 2012 (80% of pre-planned recruitment).<sup>7</sup> There was at this point 4% probability (conditional power) of showing a significant result, which meant that further trial continuation were not justified.

Table 3. Baseline demographics and clinical characteristics.

| Variable            | Surgeon (%)<br>n=55 | GP (%)<br>n=55 | Total (%)<br>n=110 | p value |
|---------------------|---------------------|----------------|--------------------|---------|
| <b>Age group</b>    |                     |                |                    |         |
| < 50                | 2 (3.6)             | 6 (10.9)       | 7 (6.3)            | 0.10    |
| 50-59               | 8 (14.5)            | 6 (10.9)       | 14 (12.7)          | 0.56    |
| 60-69               | 23 (41.8)           | 24 (43.6)      | 47 (42.7)          | 0.84    |
| 70-75*              | 22 (40.0)           | 19 (34.5)      | 41 (38.0)          | 0.55    |
| Mean age (SD)       | 66.7 (7.3)          | 64.0 (8.7)     | 65.4 (8.1)         | 0.09    |
| <b>Gender</b>       |                     |                |                    |         |
| Male                | 32 (58.2)           | 33 (60.0)      | 65 (59.1)          | 0.84    |
| Female              | 23 (41.8)           | 22 (40.0)      | 45 (40.9)          | 0.84    |
| <b>Education</b>    |                     |                |                    |         |
| Primary             | 20 (36.3)           | 18 (32.7)      | 38 (34.5)          | 0.68    |
| Secondary           | 21 (38.1)           | 25 (45.4)      | 46 (41.8)          | 0.49    |
| University < 4yrs   | 8 (14.5)            | 5 (9.0)        | 13 (11.8)          | 0.37    |
| University > 4 yrs  | 6 (10.9)            | 7 (12.7)       | 13 (11.8)          | 0.76    |
| <b>Income level</b> |                     |                |                    |         |
| Median (£)          | 32-42 000           | 32-42000       | 32-42000           |         |

|                                  |           |           |           |      |
|----------------------------------|-----------|-----------|-----------|------|
| <b>Main activity</b>             |           |           |           |      |
| Employment                       | 12 (21.8) | 17 (30.9) | 29 (26.3) | 0.27 |
| Home                             | 3 (5.4)   | 9 (16.3)  | 11 (10.0) | 0.06 |
| Out of work                      | 0 (0)     | 1 (1.8)   | 1 (0.9)   |      |
| Pensioner                        | 40 (72.7) | 28 (50.9) | 68 (61.8) | 0.01 |
| <b>Location of surgery</b>       |           |           |           |      |
| University hospital (n=1)        | 34 (61.8) | 37 (67.3) | 71 (64.5) | 0.55 |
| Local hospital (n=3)             | 21 (38.1) | 18 (32.7) | 39 (35.4) | 0.55 |
| <b>Clinical characteristics</b>  |           |           |           |      |
| <b>Tumour location</b>           |           |           |           |      |
| Cøkum                            | 13 (23.6) | 13 (23.6) | 26 (23.6) | 1.0  |
| Ascendens                        | 9 (16.3)  | 5 (9.1)   | 14 (12.7) | 0.25 |
| Transversum                      | 4 (7.2)   | 5 (9.1)   | 9 (8.1)   | 0.72 |
| Decendens                        | 1 (1.8)   | 4 (1.8)   | 5 (4.5)   | 0.15 |
| Sigmoid                          | 28 (50.9) | 28 (50.9) | 56 (50.9) | 1.0  |
| Elevated preoperative CEA        | 19 (34.5) | 23 (41.8) | 42 (38.1) | 0.55 |
| <b>Type of surgery</b>           |           |           |           |      |
| Laparoscopic surgery             | 14 (25.5) | 11 (20.0) | 25 (22.7) | 0.49 |
| Open surgery                     | 41 (74.5) | 44 (80.0) | 85 (77.3) | 0.49 |
| <b>Tumor stage</b>               |           |           |           |      |
| Dukes A                          | 12 (21.8) | 11 (20.0) | 24 (21.8) | 0.81 |
| Dukes B                          | 25 (45.5) | 30 (54.5) | 55 (50.0) | 0.34 |
| Dukes C                          | 18 (32.7) | 14 (25.5) | 32 (29.0) | 0.40 |
| New surgery due to complications | 6 (10.9)  | 9 (16.4)  | 15 (13.6) | 0.40 |
| Permanent stoma                  | 8 (14.5)  | 7 (12.7)  | 15 (13.6) | 0.78 |
| 6 months chemotherapy regime     | 18 (32.7) | 14 (25.5) | 32 (29.1) | 0.40 |

\* Patients < 75 years were included in survey. P values calculated with chi square, t test and fisher exact test when appropriate.

### Quality of life

There was no significant effect on the QoL main outcome measures. However, on the EORTC QLQ C-30 subscales, there were significant effects in favour of GP follow-up, i.e. role functioning (p=0.02), emotional functioning (p= 0.01) and pain (p=0,01) (Table 4, Figure 3 A, B, C).

Table 4. Health related quality of life (ERTOC QLQ-C30 and EQ-5D) outcome variables and estimated differences.

| Outcome variable            | Mean (SD)   |             |             | Estimated mean difference<br>(95% CI) | p *  |
|-----------------------------|-------------|-------------|-------------|---------------------------------------|------|
|                             | Baseline    | 12 months   | 24 months   |                                       |      |
| <b>Global health status</b> |             |             |             |                                       |      |
| Surgeon                     | 70.7 (22.5) | 75.9 (19.2) | 85.0 (16.8) | - 2.23 (-5.7 - 1.2)                   | 0.20 |
| GP                          | 70.4 (20.8) | 81.3 (17.0) | 86.5 (16.2) |                                       |      |
| <b>Physical functioning</b> |             |             |             |                                       |      |
| Surgeon                     | 80.5 (23.6) | 88.8 (15.0) | 88.0 (17.0) | - 2.4 (-5.7 - 0.8)                    | 0.14 |
| GP                          | 74.5 (24.9) | 90.6 (16.6) | 93.3 (16.0) |                                       |      |

|                               |             |             |             |                        |  |      |
|-------------------------------|-------------|-------------|-------------|------------------------|--|------|
| <b>Role functioning</b>       |             |             |             |                        |  |      |
| Surgeon                       | 62.5 (37.3) | 83.8 (26.5) | 90.3 (18.6) |                        |  |      |
| GP                            | 62.7 (37.5) | 91.6 (22.1) | 93.7 (20.7) | - 5.1 (-9.7 - (-0.5))  |  | 0.02 |
| <b>Emotional functioning</b>  |             |             |             |                        |  |      |
| Surgeon                       | 87.4 (18.1) | 87.7 (16.1) | 87.7 (16.9) |                        |  |      |
| GP                            | 85.8 (23.2) | 91.9 (15.8) | 94.4 (17.3) | - 3.7 (-6.8 - (-0.6))  |  | 0.01 |
| <b>Cognitive functioning</b>  |             |             |             |                        |  |      |
| Surgeon                       | 87.0 (20.6) | 86.5 (22.8) | 90.3 (15.0) |                        |  |      |
| GP                            | 72.4 (31.8) | 91.1 (17.0) | 93.0 (21.3) | -1.7 (- 5.0 - 1.4)     |  | 0.27 |
| <b>Social functioning</b>     |             |             |             |                        |  |      |
| Surgeon                       | 70.7 (30.5) | 87.0 (23.8) | 90.4 (15.6) |                        |  |      |
| GP                            | 72.4 (31.8) | 91.6 (17.3) | 93.0 (21.3) | -4.2 (-8.4 - (-0.009)) |  | 0.04 |
| <b>Fatigue</b>                |             |             |             |                        |  |      |
| Surgeon                       | 32.3 (26.1) | 19.2 (17.1) | 14.6 (23.4) |                        |  |      |
| GP                            | 36.9 (28.0) | 22.2 (19.9) | 18.3 (20.8) | 0.24 (-3.7 - 4.2)      |  | 0.9  |
| <b>Nausea and vomiting</b>    |             |             |             |                        |  |      |
| Surgeon                       | 6.0 (12.4)  | 2.8 (8.5)   | 0.9 (3.9)   |                        |  |      |
| GP                            | 6.5 (14.1)  | 3.5 (9.9)   | 4.3 (10.3)  | -0.8 (-2.8 - 1.2)      |  | 0.4  |
| <b>Pain</b>                   |             |             |             |                        |  |      |
| Surgeon                       | 22.3 (26.6) | 11.1 (21.9) | 9.6 (16.9)  |                        |  |      |
| GP                            | 19.1 (28.2) | 9.3 (14.0)  | 2.8 (14.7)  | 4.5 (0.8 - 8.2)        |  | 0.01 |
| <b>Dyspnoea</b>               |             |             |             |                        |  |      |
| Surgeon                       | 18.1 (26.3) | 14.2 (20.2) | 10.5 (19.4) |                        |  |      |
| GP                            | 24.0 (32.7) | 12.1 (23.3) | 7.2 (21.2)  | 3.0 (-1.2 - 7.2)       |  | 0.1  |
| <b>Insomnia</b>               |             |             |             |                        |  |      |
| Surgeon                       | 22.9 (25.4) | 18.5 (25.7) | 17.5 (25.7) |                        |  |      |
| GP                            | 28.6 (34.5) | 14.7 (23.4) | 23.6 (25.0) | 2.9 (-1.7 - 7.5)       |  | 0.2  |
| <b>Appetite loss</b>          |             |             |             |                        |  |      |
| Surgeon                       | 15.5 (23.1) | 3.7 (10.6)  | 1.7 (7.6)   |                        |  |      |
| GP                            | 20.9 (31.7) | 1.9 (7.9)   | 4.1 (11.2)  | 0.8 (-2.9 - 3.9)       |  | 0.6  |
| <b>Constipation</b>           |             |             |             |                        |  |      |
| Surgeon                       | 27.4 (32.0) | 21.2 (29.9) | 10.5 (19.4) |                        |  |      |
| GP                            | 18.6 (33.5) | 7.8 (16.5)  | 15.2 (19.6) | 5.1 (0.8 - 9.4)        |  | 0.01 |
| <b>Diarrhoea</b>              |             |             |             |                        |  |      |
| Surgeon                       | 24.4 (29.6) | 21.2 (25.3) | 24.5 (24.4) |                        |  |      |
| GP                            | 31.0 (33.6) | 22.5 (26.8) | 23.6 (28.6) | -1.0 (-5.7 - 3.5)      |  | 0.6  |
| <b>Financial difficulties</b> |             |             |             |                        |  |      |
| Surgeon                       | 9.8 (26.2)  | 9.2(20.4)   | 7.0 (21.0)  |                        |  |      |
| GP                            | 6.9 (21.2)  | 1.9 (7.9)   | 4.1 (11.2)  | 2.7 (-0.4 - 5.8)       |  | 0.08 |
| <b>EQ-5D Index score</b>      |             |             |             |                        |  |      |
| Surgeon                       | 0.83 (0.16) | 0.85(0.20)  | 0.90 (0.14) |                        |  |      |
| GP                            | 0.79 (0.22) | 0.87(0.18)  | 0.89 (0.13) | - 0.10 (-0.039-0.018)  |  | 0.48 |
| <b>EQ-5D VAS score</b>        |             |             |             |                        |  |      |
| Surgeon                       | 72.2 (18.9) | 78.2 (16.2) | 82.4 (16.6) |                        |  |      |
| GP                            | 67.4 (17.4) | 79.0 (14.6) | 83.5 (14.8) | -1.10 (-3.9-1.7)       |  | 0.44 |

\* Adjusted general linear model from 1800 follow-up months, [i.e. 600 QoL questionnaires \(GP 299 vs. surgeon 301\)](#).

### Cost-effectiveness

There were no significant difference on primary QoL measure (Global health status), and a cost minimisation analyses were performed. A total of 778 travels (consultations,

radiological investigations, colonoscopy) to hospital were registered, 528 in the surgeon group and 250 in the GP group, respectively. A total of 1186 health-care contacts (regular appointments, emergency appointments, phone consultations) were registered, 678 in the GP group versus 508 in the surgeon group (table 5). Mean cost of follow-up per patient per follow-up cycle was £292 in GP group and £351 in surgeon group ( $p=0.02$ ) (figure 4). Overall mean societal cost per patient for 24 months follow-up were £ 9889 in the surgeon group and £ 8233 in the GP group ( $p<0.001$ , table 6).

Table 5. Resource use in a colon cancer follow-up program.

| Cost variable                         | Surgeon<br>n=55  |             |                  | GP<br>n=55       |             |                             | Total<br>n=110   |             |                  |
|---------------------------------------|------------------|-------------|------------------|------------------|-------------|-----------------------------|------------------|-------------|------------------|
|                                       | n                | n/<br>cycle | cost/<br>cycle   | n                | n/<br>cycle | cost/<br>cycle              | n                | n/<br>cycle | cost/cycle       |
| <b>Follow-up months</b>               | 903              |             |                  | 897              |             |                             | 1800             |             |                  |
| <b>Hospital travels</b>               |                  |             |                  |                  |             |                             |                  |             |                  |
| Car                                   | 189              | 0.62        | a                | 113              | 0.37        | a                           | 302              | 0.50        | a                |
| Taxi                                  | 37               | 0.12        |                  | 22               | 0.07        |                             | 59               | 0.09        |                  |
| Bus                                   | 96               | 0.31        |                  | 33               | 0.11        |                             | 129              | 0.21        |                  |
| Airplane                              | 0                | 0           |                  | 8                | 0.02        |                             | 8                | 0.01        |                  |
| Express boat                          | 43               | 0.14        |                  | 12               | 0.04        |                             | 55               | 0.09        |                  |
| Extra travel due to<br>poor logistics | 104              | 0.34        |                  | 52               | 0.17        |                             | 156              | 0.26        |                  |
| Travel assistant                      | 59               | 0.19        |                  | 10               | 0.03        |                             | 69               | 0.11        |                  |
| Hotel                                 | 7                | 0.02        | 1.7<br>(11)      | 8                | 0.02        | 2.0<br>(12)                 | 15               | 0.02        | 1.8<br>(11.6)    |
| Total                                 | 528 <sup>a</sup> | 1.75        |                  | 250 <sup>a</sup> | 0.83        |                             | 778 <sup>a</sup> | 1.29        |                  |
| Mean cost<br>£ (SD)                   |                  |             | 156.9<br>(145.0) |                  |             | 76.7 (160.1,<br>$p<0.001$ ) |                  |             | 117.1<br>(157.7) |
| <b>GP office travels</b>              |                  |             |                  |                  |             |                             |                  |             |                  |
| Car                                   | 155              | 0.51        | b                | 317              | 1.06        | b                           | 472              | 0.78        | b                |
| Taxi                                  | 7                | 0.02        |                  | 14               | 0.05        |                             | 21               | 0.03        |                  |
| Bus                                   | 17               | 0.06        |                  | 35               | 0.12        |                             | 52               | 0.08        |                  |
| Travel assistant                      | 0                | 0           |                  | 15               | 0.05        |                             | 15               | 0.02        |                  |
| Total                                 | 179              | 0.59        |                  | 381              | 1.27        |                             | 560              | 0.93        |                  |
| Mean cost<br>£ (SD)                   |                  |             | 4.1<br>(7.9)     |                  |             | 9.0 (9.1,<br>$p<0.001$ )    |                  |             | 6.6<br>(8.9)     |
| <b>Out of pocket expenses</b>         |                  |             |                  |                  |             |                             |                  |             |                  |
| Mean cost<br>£ (SD)                   |                  |             | 2.7<br>(7.7)     |                  |             | 4.3 (15.0,<br>$p=0.10$ )    |                  |             | 3.5 (11.9)       |
| <b>Health care contacts</b>           |                  |             |                  |                  |             |                             |                  |             |                  |
| GP consultations                      | 156              | 0.52        | 9.6 (17.8)       | 329              | 1.10        | 20.6<br>(19.9)              | 485              | 0.80        | 15.1<br>(19.6)   |

|                                  |              |      |                    |                      |      |                                |              |      |                     |
|----------------------------------|--------------|------|--------------------|----------------------|------|--------------------------------|--------------|------|---------------------|
| GP phone consultation            | 61           | 0.20 | 1.0<br>(3.9)       | 94                   | 0.31 | 1.7<br>(4.3)                   | 155          | 0.25 | 1.4<br>(4.1)        |
| GP emergency consultations       | 23           | 0.08 | 1.9 (12.2)         | 37                   | 0.12 | 3.2<br>(14.4)                  | 60           | 0.1  | 2.6<br>(13.3)       |
| Surgeon outpatient consultations | 227          | 0.75 | 52.3<br>(93.8)     | 185                  | 0.61 | 43.3<br>(104.1)                | 412          | 0.68 | 47.8<br>(99.0)      |
| Surgeon phone consultations      | 41           | 0.14 | 1.45<br>(5.7)      | 33                   | 0.11 | 1.2<br>(4.4)                   | 74           | 0.12 | 1.32<br>(5.1)       |
| Total                            | 508          | 1.68 |                    | 678                  | 2.26 |                                | 1186         | 1.97 |                     |
| Mean cost<br>£ (SD)              |              |      | 66.4<br>(100.1)    |                      |      | 70.1 (112.2,<br>p=0.67)        |              |      | 68.2<br>(106.1)     |
| <b>NGICG follow-up tests</b>     |              |      |                    |                      |      |                                |              |      |                     |
| Blood samples                    | 203          | 0.67 | 3.3<br>(5.1)       | 300                  | 1.0  | 5.1<br>(6.8)                   | 503          | 0.83 | 4.2<br>(6.0)        |
| Chest x ray                      | 150          | 0.50 | 12.2<br>(12.2)     | 128                  | 0.43 | 10.6<br>(12.1)                 | 278          | 0.46 | 11.4<br>(12.2)      |
| CEUS                             | 110          | 0.37 | 56.2<br>(74.0)     | 99                   | 0.33 | 51<br>(72.5)                   | 209          | 0.34 | 53.8<br>(73.2)      |
| Colonoscopy                      | 50           | 0.17 | 49.2<br>(110.3)    | 65                   | 0.22 | 65.1<br>(122)                  | 115          | 0.19 | 57.1<br>(116.7)     |
| Total                            | 513          | 1.70 |                    | 592                  | 1.97 |                                | 1105         | 1.84 |                     |
| Mean cost<br>£ (SD)              |              |      | 121.1<br>(152.8)   |                      |      | 132.2 (166.7,<br>p=0.39)       |              |      | 126.6<br>(159.8)    |
| <b>Work loss</b>                 |              |      |                    |                      |      |                                |              |      |                     |
| Patients in paid work (n)        | 17           |      |                    | 12                   |      |                                | 29           |      |                     |
| Days off work<br>mean (SD)       | 215<br>(168) |      |                    | 198 (190,<br>p=0.79) |      |                                | 208<br>(219) |      |                     |
| <sup>c</sup> Mean cost<br>£ (SD) |              |      | 2440<br>(1906)     |                      |      | 1884 (2092,<br>p=0.45)         |              |      | 2086<br>(2014)      |
| <b>Serious clinical events</b>   |              |      |                    |                      |      |                                |              |      |                     |
| Number of events                 | 22           |      |                    | 26                   |      |                                | 48           |      |                     |
| <sup>d</sup> Mean cost<br>£ (SD) |              |      | 261.6<br>(157.7)   |                      |      | 573.1 (838.9,<br>p=0.14)       |              |      | 444.0<br>(662.4)    |
| <b>Metastases surgeries</b>      |              |      |                    |                      |      |                                |              |      |                     |
| Cancer recurrences               | 8            |      |                    | 6                    |      |                                | 14           |      |                     |
| Metastases surgeries             | 4            |      |                    | 3                    |      |                                | 7            |      |                     |
| <sup>e</sup> Mean cost<br>£ (SD) |              |      | 9037.2<br>(5117.5) |                      |      | 13316.0<br>(1489.0,<br>p=0.22) |              |      | 10871.0<br>(4366.3) |

<sup>a</sup> Mean travel cost for hospital travels, see table 2. <sup>b</sup> Values calculated with a median distance GP office 30 km. <sup>c</sup> Value represent the mean cost (standard deviation) relating to the subsample who were in paid work at time of surgical treatment. NGICG: Norwegian Gastrointestinal Cancer Group. Follow-up cycle = 3 months. CEUS: Contrast enhanced liver ultrasound. <sup>d</sup> Value represent the mean cost (standard deviation) of work up tests (CEA, chest x-ray, colonoscopy), relating to the subsample who experienced a serious

clinical event. <sup>a</sup> Value represent the mean cost (standard deviation) relating to the subsample who performed metastases surgery.

Table 6. Cost of colon cancer follow-up

| Cost Variable (mean, £)                     | Surgeon<br>n=55 | GP<br>n=55    | Total<br>n=110 | p value |
|---------------------------------------------|-----------------|---------------|----------------|---------|
| Healthcare cost/_per follow-up cycle £ (SD) | 351 (324)       | 292 (332.9)   | 324.1 (330.0)  | 0.02    |
| Bootstrapped 95% c.i.                       | 315 - 386       | 255 - 327     | 296 - 348      |         |
| Mean difference £                           |                 | 58            |                |         |
| Healthcare cost/_24 month follow-up £ (SD)  | 3178 (2917)     | 2651 (3004)   | 2917(2970)     | 0.03    |
| Bootstrapped 95% c.i.                       | 2833 - 3485     | 2228 - 3006   | 2660 - 3147    |         |
| Mean difference £                           |                 | 529           |                |         |
| Societal cost/_per follow-up cycle £ (SD)   | 1098 (324)      | 914 (332)     | 1007 (340)     | < 0.001 |
| Bootstrapped 95% c.i.                       | 1062 - 1139     | 877 - 954     | 981 - 1034     |         |
| Mean difference £                           |                 | 184           |                |         |
| Societal cost/_24 month follow-up £ (SD)    | 9889 (2917)     | 8233 (2996.1) | 9068 (3068.2)  | < 0.001 |
| Bootstrapped 95% c.i.                       | 9569 - 10194    | 7904 - 8619   | 8823 - 9320    |         |
| Mean difference £                           |                 | 1656          |                |         |

In estimation of health care and societal cost, cycles with complete cost data (n=600 i.e. 1800 follow-up months) were included in analyses (as defined in table 1). Cost data from 28-57 follow-up cycles were excluded from analyses (incomplete ID or not returned forms). Cost of sick leave was adjusted for baseline characteristic. Cost of serious clinical events and metastases surgeries were adjusted for the percentage of events. Fu: follow-up. C.i: confidence interval, based on 1000 stratified bootstrap samples.

### Sensitivity analyses

The single factor with greatest impact on overall societal costs was sick-leave followed by cost of follow-up tests and cost of hospital travels. Variances in cost related to GP office travels and follow-up appointments had minor impact on overall cost in a follow-up program (figure 5).

### Time to cancer diagnoses

48 serious clinical events (SCE) occurred, mean time until diagnosis of a serious clinical event was 45 days in the surgeon group and 35 days in the GP group (p=0.46). Of patients with SCE, 14 patients had cancer recurrence and 7 patients (50%) were offered metastases surgery. Median time to diagnoses of recurrence was 21 days in the GP



group (range 2-270 days) and 30 days in the surgeon group (range 3-45 days) (table 7). Five patients died (all deaths caused by disseminated colon cancer) during the follow-up period (GP 1 vs. surgeon 4).

Table 7. Clinical presentation of colon cancer recurrence by trial group

| Case no              | Sex | Presenting problem                                                                  | Routine/interval | Diagnostic tests                         | Metastatic site                 | Time to diagnoses (days) | Metastases surgery | Time to surgery (days) |
|----------------------|-----|-------------------------------------------------------------------------------------|------------------|------------------------------------------|---------------------------------|--------------------------|--------------------|------------------------|
| <b>GP group</b>      |     |                                                                                     |                  |                                          |                                 |                          |                    |                        |
| 1                    | F   | Elevated CEA                                                                        | routine          | CEUS<br>PET-CT                           | Disseminated                    | 27                       | no                 | inoperable             |
| 2                    | M   | Abdominal pain                                                                      | interval         | CEUS                                     | Liver                           | 21                       | no                 | inoperable             |
| 3                    | M   | Elevated CEA                                                                        | routine          | CEA<br>CT thorax<br>CT abdomen           | Disseminated                    | 71                       | no                 | inoperable             |
| 4                    | M   | Metastatic lesion detected at CEUS                                                  | routine          | CEUS<br>CT thorax<br>CT abdomen          | Liver                           | 4                        | yes                | 38                     |
| 5                    | F   | Abdominal pain, normal CEA, CT and CEUS, disseminated cancer detected at laparotomy | interval         | CEUS<br>CT thorax<br>CT abdomen          | Disseminated                    | 270                      | yes                | 270                    |
| 6                    | M   | Abdominal tenderness                                                                | interval         | Anorectoscopy<br>CT thorax<br>CT abdomen | Local recurrence                | 2                        | yes                | 30                     |
| <b>Surgeon group</b> |     |                                                                                     |                  |                                          |                                 |                          |                    |                        |
| 7                    | M   | Metastatic lesion detected chest x-ray                                              | routine          | CT thorax<br>CT abdomen                  | Lung                            | 45                       | yes                | 62                     |
| 8                    | M   | Stoma bleeding                                                                      | interval         | Colonoscopy<br>CT thorax<br>CT abdomen   | Local and lymph node recurrence | 10                       | no                 | inoperable             |
| 9                    | M   | Weight loss<br>Night sweating                                                       | routine          | CT Thorax<br>CT abdomen                  | Lung                            | 45                       | no                 | inoperable             |
| 10                   | M   | Metastatic lesion detected at chest x                                               | routine          | CT Thorax<br>CT abdomen                  | Lung                            | 4                        | yes                | 42                     |

1  
2  
3  
4  
5  
6  
7  
8  
9  
10  
11  
12  
13  
14  
15  
16  
17  
18  
19  
20  
21  
22  
23  
24  
25  
26  
27  
28  
29  
30  
31  
32  
33  
34  
35  
36  
37  
38  
39  
40  
41  
42  
43  
44  
45  
46  
47  
48  
49  
50  
51  
52  
53  
54  
55  
56  
57  
58  
59  
60

|    |   |                                 |          |                                     |               |    |     |            |
|----|---|---------------------------------|----------|-------------------------------------|---------------|----|-----|------------|
| 11 | M | Metastatic lesion detected-CEUS | routine  | MR liver<br>CT-thorax<br>CT-abdomen | Liver         | 3  | yes | 43         |
| 12 | F | Abdominal-pain                  | interval | CT-abdomen<br>CT-thorax             | Disseminated  | 16 | no  | inoperable |
| 13 | M | Elevated-CEA                    | routine  | CT-thorax<br>CT-abdomen<br>CT-liver | Liver<br>Lung | 30 | no  | inoperable |
| 14 | F | Occult blood in faeces          | interval | CT-thorax<br>CT-abdomen<br>CEUS     | Liver         | 31 | yes | 35         |

## Discussion

### Summary of findings

A representative population of patients surgically treated for colon cancer participated in this trial, with an expected normal variance of demographic factors and colon cancer severity. In this study patients were followed for up to two years, i.e. the period with most cancer recurrences and serious clinical events, which again would impact QoL and costs of follow-up. We have shown that a decentralised colon cancer follow-up program will not impair QoL, on the contrary we observed a significant improvement in the following QoL subscales; role functioning, emotional functioning and pain. This is the first trial evaluating the economical implications of a GP organised follow-up program after curative resection for colon cancer. Despite a higher frequency of health care contacts in primary care, a decentralised GP organised follow-up program was associated with total cost savings due to decreased cost of primary care consultations and less hospital travels. Importantly, our result shows that GP follow-up was not associated with increased time to diagnosis of [SCE and thus a](#) cancer recurrence (35 versus 45 days,  $p=0.46$ ), and the frequency of a SCE was similar in both groups.

### Comparison with existing literature and on going trials

Although intensive follow-up is associated with improved survival, there are still international controversies on how to best organise follow-up of colon cancer patients. These controversies are mirrored in the wide variation of national follow-up guidelines.<sup>4-7</sup> Two systematic reviews, comparing follow-up trials have been published.<sup>2,3</sup> Due to the variation in the follow-up programs included in these reviews, it is not possible to

1  
2  
3  
4  
5  
6  
7 infer the best combination of consultations, blood tests, colonoscopy, radiological  
8 investigations and level of care to maximise the outcomes.<sup>2</sup> Large randomised trials are  
9 under way (COLOFOL, GILDA, FACS) but results are most likely years away.<sup>9-11</sup> Few  
10 published surveys have evaluated the effect of a GP organised follow-up program. Two  
11 surveys have reported on quality of life in a primary care based follow-up program, and  
12 a single cost-effectiveness analysis of intensified hospital based follow-up was published  
13 in 2004.<sup>30-32,28-30</sup> Surveys have assessed cost of follow-up in a Norwegian setting. In a  
14 retrospective survey 314 patients were assessed with regards to cost, compliance and  
15 success rate of curative surgery. It was concluded that the cost of one successful curative  
16 surgery was \$ 25 289, and that further implementation of such a program should be  
17 debated.<sup>33</sup> Harms and unintended effects of a follow-up program is poorly explored.  
18 Especially is the rate of false positive tests in a follow-up program unknown. Current  
19 surveillance is often based on serial CEA measurements, this biomarker has several  
20 pitfalls and shortcomings. In a recent survey, it is shown that the diagnostic accuracy of  
21 serial measurement of CEA is low, and is impacted by the cut off value.<sup>34</sup> These aspects  
22 are of high importance when designing a follow-up program, as false positive test  
23 probably has a negative impact on the patients quality of life. Finally, there exist  
24 considerable variance in follow-up strategies, internationally and at a national level.<sup>35</sup>  
25 This makes outcome comparison between different follow-up strategies challenging.  
26 ~~However,~~ For other cancer conditions more cost-effective ways of organising follow-up  
27 is extensively described and evaluated. For breast cancer patients, nurse lead telephone  
28 and GP organised follow-up is cost-effective<sup>36,37,38,33</sup> with no increase in the frequency of  
29 SCE.<sup>39,34</sup> Nevertheless, the quality of primary care cancer management is still debated.<sup>40-</sup>  
30 <sup>42,35-37</sup>

### Strengths and limitations

41  
42  
43  
44 Our trial has several strengths. Firstly, this is the first randomised trial addressing the  
45 economical implications and time to recurrent cancer diagnoses in a GP organised colon  
46 cancer follow-up program. We have shown that GP organised follow-up, even with  
47 increased frequency of health care contacts, was associated with cost savings and no  
48 decline in quality of life. Secondly, poor guideline compliance has been shown to  
49 represent a problem in cancer follow-up programs.<sup>43,38</sup> However, tools to support  
50 decision making in cancer are on way forward. In this study, a decision support  
51  
52  
53  
54  
55  
56  
57  
58  
59  
60

1  
2  
3  
4  
5  
6  
7  
8  
9  
10  
11  
12  
13  
14  
15  
16  
17  
18  
19  
20  
21  
22  
23  
24  
25  
26  
27  
28  
29  
30  
31  
32  
33  
34  
35  
36  
37  
38  
39  
40  
41  
42  
43  
44  
45  
46  
47  
48  
49  
50  
51  
52  
53  
54  
55  
56  
57  
58  
59  
60

pamphlet was part of the intervention and the patient and the GP organising the follow-up received a decision support tool. Detailed instructions of forthcoming follow-up consultations and test were given. We believe this decision support tool contributed to a high follow-up guideline adherence (table 6, GP 592 tests vs. surgeon 513 tests). Thirdly, we have shown that the rate of SCE and time to diagnosis of cancer recurrence is comparable between groups. In our opinion, this is an indicator of adequate quality in a GP organised follow-up program.

There exist ~~some~~ limitations. Firstly, it might be argued that we were missing important information by choosing another endpoint than survival. However, this trial was designed primarily to evaluate whether general practice follow-up results in effect on patient specific quality of life and cost effectiveness. We acknowledge that this choice of endpoint might impact the observed frequency of serious clinical events and time to cancer diagnoses, as a higher number of SCE and cancer recurrences would have occurred with a longer follow-up time. ~~Nevertheless, during our trial length of 1884 follow-up months we observed fewer recurrences than anticipated (15,4%), however this might be related to the decreasing rate of colon cancer recurrences at a national level (unpublished data Cancer Registry of Norway).~~ Similarly, costs will be impacted by a longer follow-up time. However, when health care cost of follow-up is analysed separately (table 5, figure 3), cost spendings are significantly lower in the GP group compared to the surgeon group. Secondly, ~~generalizability~~ and cost transferability across jurisdictions might be challenging, as elements of cost data may vary from place to place.<sup>4439</sup> It might be argued that this is a single country trial with limited generalizability. However, we do not think this is the case. Comparable follow-up trials have been performed in countries like USA, Canada, UK, Australia, Netherlands.

~~30,38,39,45,28,33,34,40~~ These surveys are commonly cited and thus accepted as generalizable.

In Norway, the GP has a traditional gatekeeper function and plays a central role managing resource use in secondary care. Similarly, many European countries have a health care organisation where the GP plays a central role as gatekeeper to access of secondary health care service. In our trial, guidelines for dealing with aspects of generalizability and transferability were applied, and variations in units costs were included in the sensitivity analyses (see figure 4).<sup>4439</sup>

1  
2  
3  
4  
5  
6  
7 Finally, the trial was stopped after 1884 follow-up months due to no significant effect of  
8 the intervention on global health score and implementation of a new national follow-  
9 up program. This might be a potential is a limitation, as it will impact the interpretation  
10 of cancer recurrence. However, it would have been unethical to spend large resources  
11 over years to complete a trial an intervention with a 4% probability of proving the  
12 primary hypotheses. showing a significant impact on -global health score.  
13  
14  
15  
16

### 17 **Implication for patients, decision makers and clinicians**

18 Colon cancer in numbers is the third largest cancer type worldwide and a considerable  
19 number of patients are enrolled in a post surgical surveillance program, resulting in  
20 significant societal cost. However, as there is no evidence based consensus of how to  
21 design cost-effective follow-up programs, differences in tests, test frequency and level of  
22 care will have high impact on societal cost spending. Therefore, the cost driving  
23 elements in a colon cancer follow-up program have to be critically evaluated. For many  
24 patients, follow-up leads to a number of long distance travels to hospital, causing high  
25 societal cost. Thus, from an economical perspective, GP organised follow-up is cost-  
26 effective due to a better coordination of care.  
27  
28  
29  
30

31 From a societal perspective, this survey has important implications. -It may be argued  
32 that there are limited benefits from having GPs organising the follow-up program, as the  
33 radiological examinations and the colonoscopy have to be performed in-hospital  
34 anyway. However, we believe the most important factors causing a less costly GP follow-  
35 up are: Better coordination of care: As shown in table 5, GP organised follow-up leads to  
36 fewer hospital travels. We believe this is mainly caused by improved coordination of  
37 care, for instance by performing multiple radiological test at the same hospital visit.  
38 Interestingly the GP group had fewer extra travels (GP 52 travels versus Surgeon 102  
39 travels) due to poor logistics (table 5). Cost of GP consultation vs. hospital consultation:  
40 The societal cost of GP consultations is lower compared to cost of hospital consultations,  
41 due to a more costly hospital infrastructure. Complex and chronic conditions: Finally,  
42 Ppatients surgically treated often have other chronic illnesses, and there is a trend  
43 towards higher involvement of primary care in treating these conditions as described in  
44 the chronic care model.<sup>13</sup> Sick leave: Although not statistical significant, patients in the  
45 GP group return to work 17 days (mean) earlier compared to patients in the surgeon  
46 group.  
47  
48  
49  
50  
51  
52  
53  
54  
55  
56  
57  
58  
59  
60

1  
2  
3  
4  
5  
6  
7 In a time with escalating health care cost, especially in cancer care, ~~these improved~~  
8 ~~coordination of care aspects~~ are of increasing importance.

9  
10 From a patient perspective, GP organised follow-up is associated with high quality of  
11 care ~~and leads to fewer time consuming hospital travels~~. Our study demonstrates that a  
12 decentralised follow-up has no negative impact on quality of life, length to cancer  
13 diagnoses and follow-up guideline adherence. ~~Finally, patients surgically treated often~~  
14 ~~have other chronic illnesses, and there is a trend towards higher involvement of primary~~  
15 ~~care in treating these conditions as described in the chronic care model.<sup>43</sup>~~

16  
17 From a hospital perspective, a transfer of follow-up programs to primary care have  
18 economical and organisational implications. GP organised follow-up may be an effective  
19 way of reducing the burden on busy hospital clinics.  
20  
21

Formatted: Font color: Auto, English (U.S.)

## 22 23 24 **Conclusion**

25 The present study suggests that colon cancer follow-up can safely be performed by GPs,  
26 with no negative impact on quality of life and to a lower cost. ~~However, there exist~~  
27 ~~limitations. 13% (n=14) patients had colon cancer recurrence, this low recurrence rate~~  
28 ~~is most likely caused by limited long term follow-up as most recurrences occur within 3~~  
29 ~~years. Furthermore, t~~~~However, solid evidence is missing regarding the optimal follow-up~~  
30 ~~program that maximise survival.~~~~he best combination of consultations, radiological test,~~  
31 ~~blood samples and colonoscopy that optimizes cancer survival is still unknown. We~~  
32 ~~therefore argue that cost driving elements of colon cancer surveillance should be~~  
33 ~~critically evaluated, when designing and implementing follow-up programs, as cancer~~  
34 ~~surveillance represents a huge financial burden for society. Finally, little is known about~~  
35 ~~the potential harms of follow-up, especially when it comes to the impact of false positive~~  
36 ~~tests. Further research is needed to settle these controversies, and new methods of~~  
37 ~~decision-analytic modeling in combination with emerging data from on-going~~  
38 ~~randomised trials must be applied. We believe new methods of comparative~~  
39 ~~effectiveness research in combination with emerging data from randomised trials must~~  
40 ~~be used to settle these controversies.<sup>4641</sup>~~  
41  
42  
43  
44  
45  
46  
47  
48  
49

## 50 51 **Contribution**

52 KMA and ROL conceived and designed the research idea, and were responsible for the  
53 overall administration and direction of the study, the analysis and interpretation of data.  
54  
55

1  
2  
3  
4  
5  
6  
7 KMA and SOS designed the statistical analyses. KMA did the statistical analyses. KMA did  
8 the economic analysis with assistance from JN, who contributed to the design, data  
9 analysis, and interpretation of the findings. TN, RA and SD helped with patient  
10 recruitment and randomization, and to do the trial and interpreted the findings. UR  
11 advised on the trial protocol, unit cost and reimbursement practice in primary care. BV  
12 advised on protocol writing and pre trial sample size calculations and manuscript  
13 revision. KMA wrote the first draft. All authors read and approved the final manuscript.  
14 KMA had full access to all the data in the study and had final responsibility for the  
15 decision to submit for publication.  
16  
17  
18  
19  
20  
21  
22  
23

#### 24 **Competing interest**

25 All authors have completed the ICMJE uniform disclosure form at  
26 [www.icmje.org/coi\\_disclosure.pdf](http://www.icmje.org/coi_disclosure.pdf) (available on request from the corresponding author)  
27 and declare: The study was funded by a research grant from Northern Norwegian Health  
28 Authorities. The authors declare that they have no conflicts of interest.  
29  
30  
31  
32

#### 33 **Acknowledgements**

34 We thank Trine Hansen at Norwegian Centre for Integrated Care and Telemedicine for  
35 administrative support and for maintaining the research database. We thank professor  
36 Roar Johnsen, Department of Public Health and General Practice, Norwegian University  
37 of Science and Technology, for assistance in protocol writing and design of trial. We  
38 thank professor Lars Vatten, Department of Epidemiology, Norwegian University of  
39 Science and Technology for assistance in prestudy sample size calculations. We thank  
40 Johnie Rose, MD, PhD, Department of Family Medicine and Community Health, Case  
41 Western Reserve University, for valuable comments on our research and manuscript.  
42 We thank Dr Caroline Sagatun (Surgical Department, Bodø Regional Hospital), Dr  
43 Henriette Fagertun (Surgical Department, Harstad Hospital), for comments on the study  
44 protocol and identification of potential trial participants. We thank Frank Hauboff  
45 (Surgical Outpatient Clinic, University Hospital of North Norway) for assistance in  
46 randomisation and identification of potential trial participants. We thank Berit Marianne  
47  
48  
49  
50  
51  
52  
53  
54  
55  
56  
57  
58  
59  
60

1  
2  
3  
4  
5  
6  
7 Bjelkåsen, Norwegian University of Science and Technology, for assistance with the web  
8 based randomisation service.  
9

#### 10 11 **Data sharing**

12 No additional data available.  
13

#### 14 15 **Copyright for authors**

16  
17 The Corresponding Author has the right to grant on behalf of all authors and does grant  
18 on behalf of all authors, a worldwide licence to the Publishers and its licensees in  
19 perpetuity, in all forms, formats and media (whether known now or created in the  
20 future), to i) publish, reproduce, distribute, display and store the Contribution, ii)  
21 translate the Contribution into other languages, create adaptations, reprints, include  
22 within collections and create summaries, extracts and/or, abstracts of the Contribution,  
23 iii) create any other derivative work(s) based on the Contribution, iv) to exploit all  
24 subsidiary rights in the Contribution, v) the inclusion of electronic links from the  
25 Contribution to third party material where-ever it may be located; and, vi) licence any  
26 third party to do any or all of the above.  
27  
28  
29  
30  
31

#### 32 33 **References**

- 34  
35 [1 Larsen IK, editor. Cancer in Norway 2009. Cancer Registry of Norway 2011; : 1-169.](#)  
36  
37 [2 Jeffery M. Follow-up strategies for patients treated for non-metastatic colorectal](#)  
38 [cancer. The Cochrane Collaboration 2007: 1-31.](#)  
39  
40 [3 Tjandra JJ, Chan MKY. Follow-Up After Curative Resection of Colorectal Cancer: A](#)  
41 [Meta-Analysis. Dis Colon Rectum 2007; 50: 1783-99.](#)  
42  
43 [4 Figueredo A, Rumble RB, Maroun J, et al. Follow-up of patients with curatively](#)  
44 [resected colorectal cancer: a practice guideline. BMC Cancer 2003; 3: 26.](#)  
45  
46 [5 Scholefield J, editor. Guidelines for the Management of Colorectal Cancer. The](#)  
47 [Association of Coloproctology of Great Britain and Ireland 2007; 3: 1-117.](#)  
48  
49 [6 Bülow S, editor. Retningslinier for diagnostik og behandling af kolorektal cancer](#)  
50 [\(Danish Guidelines\). Danish Colorectal Cancer Group 2009; 4: 1-176.](#)  
51  
52 [7 Vonen B, editor. Nasjonalt handlingsprogram med retningslinjer for diagnostikk,](#)  
53 [behandling og oppfølging av kreft i tynntarm og endetarm \(Norwegian Guidelines\).](#)  
54 [Norwegian Gastrointestinal Cancer Group NGICG 2010: 1-162.](#)  
55  
56 [8 Engstrom PF, editor. NCCN Clinical Practice Guidelines in Oncology Colon Cancer](#)  
57  
58  
59  
60



- 1  
2  
3  
4  
5  
6  
7 [V.2.2009. National Comprehensive Cancer network 2009; 2: 1-71.](#)
- 8  
9 [9 Follow-Up Study of Patients Who Have Undergone Surgery for Stage I, Stage II, or](#)  
10 [Stage III Colorectal Cancer. \*clinicaltrials.gov\*. 2009: 1-4.](#)
- 11 [10 Grossmann EM, Johnson FE, Virgo KS, Longo WE, Fossati R. Follow-up of colorectal](#)  
12 [cancer patients after resection with curative intent—the GILDA trial. \*Surgical\*](#)  
13 [Oncology 2004; 13: 119-24.](#)
- 14  
15 [11 Wille-Jørgensen P, Laurberg S, Carriquiry L, et al. An interim analysis of recruitment](#)  
16 [to the COLOFOL trial. \*Colorect Dis\* 2009; 11: 756-8.](#)
- 17  
18 [12 Wille-Jørgensen P, Balleby L. Follow-up in colorectal cancer: questions to be](#)  
19 [answered. \*Colorect Dis\* 2011; 13: 959-60.](#)
- 20  
21 [13 Bodenheimer T, Wagner EH, Grumbach K. Improving primary care for patients with](#)  
22 [chronic illness. \*JAMA: The Journal of the American Medical Association\* 2002; 288:](#)  
23 [1775-9.](#)
- 24  
25 [14 National Cancer Survivor Initiative. \*Department of Health, Macmillan Cancer\*](#)  
26 [Support and NHS Improvement, London, UK 2010; : 1-82.](#)
- 27  
28 [15 Augestad KM, Vonon B, Aspevik R, et al. Should the surgeon or the general](#)  
29 [practitioner \(GP\) follow up patients after surgery for colon cancer? A randomized](#)  
30 [controlled trial protocol focusing on quality of life, cost-effectiveness and serious](#)  
31 [clinical events. \*BMC Health Serv Res\* 2008; 8: 137.](#)
- 32  
33 [16 Campbell NC. Designing and evaluating complex interventions to improve health](#)  
34 [care. \*BMJ\* 2007; 334: 455-9.](#)
- 35  
36 [17 Kawamoto K. Improving clinical practice using clinical decision support systems: a](#)  
37 [systematic review of trials to identify features critical to success. \*BMJ\* 2005; 330:](#)  
38 [765-0.](#)
- 39  
40 [18 Sprangers MA, Cull A, Bjordal K, Groenvold M, Aaronson NK. The European](#)  
41 [Organization for Research and Treatment of Cancer. Approach to quality of life](#)  
42 [assessment: guidelines for developing questionnaire modules. EORTC Study Group](#)  
43 [on Quality of Life. \*Qual Life Res\* 1993; 2: 287-95.](#)
- 44  
45 [19 Dolan P. Modeling valuations for EuroQol health states. \*Med Care\* 1997; 35: 1095-](#)  
46 [108.](#)
- 47  
48 [20 Dolan P. The Time Trade-off method: Results from a general population study.](#)  
49 [Health Economics 2006; 5: 1-14.](#)
- 50  
51 [21 Cambell M. Estimating sample sizes for binary, ordered categorical, and continuous](#)  
52 [outcomes in two group comparisons. \*BMJ\* 1995; 311: 1145-7.](#)
- 53  
54 [22 King M. The interpretation of scores from the EORTC quality of life questionnaire](#)  
55 [QLQ-C30. \*Quality of Life Research\* 2004; 5: 555-67.](#)

1  
2  
3  
4  
5  
6  
7  
8  
9  
10  
11  
12  
13  
14  
15  
16  
17  
18  
19  
20  
21  
22  
23  
24  
25  
26  
27  
28  
29  
30  
31  
32  
33  
34  
35  
36  
37  
38  
39  
40  
41  
42  
43  
44  
45  
46  
47  
48  
49  
50  
51  
52  
53  
54  
55  
56  
57  
58  
59  
60

- 23 [Drummond M. Guidelines for authors and peer reviewers of economic submissions to the BMJ. \*BMJ\* 1996; \*\*313\*\*: 275–83.](#)
- 24 [Drummond M, Sculpher MJ, Torrance GW. Methods for the Economic Evaluation of Health Care Programmes. 2005.](#)
- 25 [Desgagné A, Castilloux A, Angers J, LeLorier J. The use of the bootstrap statistical method for the pharmacoeconomic cost analysis of skewed data. \*Pharmacoeconomics\* 1998; \*\*13\*\*: 487–97.](#)
- 26 [Hill JC, Whitehurst D, Lewis M, \*et al\*. Comparison of stratified primary care management for low back pain with current best practice \(STarT Back\): a randomised controlled trial. \*Lancet\* 2011; \*\*378\*\*: 1560–71.](#)
- 27 [Lachin JM. Futility interim monitoring with control of type I and II error probabilities using the interim Z-value or confidence limit. \*Clin Trials\* 2009; \*\*6\*\*: 565–73.](#)
- 28 [Lachin JM. A review of methods for futility stopping based on conditional power. \*Statist Med\* 2005; \*\*24\*\*: 2747–64.](#)
- 29 [Jitlal M, Khan I, Lee SM, Hackshaw A. Stopping clinical trials early for futility: retrospective analysis of several randomised clinical studies. \*Br J Cancer\* 2012; \*\*107\*\*: 910–7.](#)
- 30 [Wattchow DA, Weller DP, Esterman A, \*et al\*. General practice vs surgical-based follow-up for patients with colon cancer: randomised controlled trial. \*Br J Cancer\* 2006; \*\*94\*\*: 1116–21.](#)
- 31 [Renehan AG, O'Dwyer ST, Whynes DK. Cost effectiveness analysis of intensive versus conventional follow up after curative resection for colorectal cancer. \*BMJ\* 2004; \*\*328\*\*: 1–5.](#)
- 32 [Gall CA, Weller D, Esterman A, \*et al\*. Patient Satisfaction and Health-Related Quality of Life After Treatment for Colon Cancer. \*Dis Colon Rectum\* 2007; \*\*50\*\*: 801–9.](#)
- 33 [Körner H, Søreide K, Stokkeland PJ, Søreide JA. Systematic Follow-up After Curative Surgery for Colorectal Cancer in Norway: A Population-Based Audit of Effectiveness, Costs, and Compliance. \*Journal of Gastrointestinal Surgery\* 2005; \*\*9\*\*: 320–8.](#)
- 34 [Körner H, Søreide K, Stokkeland PJ, Søreide JA. Diagnostic Accuracy of Serum-Carcinoembryonic Antigen in Recurrent Colorectal Cancer: A Receiver Operating Characteristic Curve Analysis. \*Ann Surg Oncol\* 2006; \*\*14\*\*: 417–23.](#)
- 35 [Søreide K, Traeland JH, Stokkeland PJ, Glomsaker T, Søreide JA, Körner H. Adherence to national guidelines for surveillance after curative resection of nonmetastatic colon and rectum cancer: a survey among Norwegian gastrointestinal surgeons. \*Colorect Dis\* 2012; \*\*14\*\*: 320–4.](#)
- 36 [Beaver K, Hollingworth W, McDonald R, \*et al\*. Economic evaluation of a randomized](#)

1  
2  
3  
4  
5  
6  
7 [clinical trial of hospital versus telephone follow-up after treatment for breast cancer. \*Br J Surg\* 2009; \*\*96\*\*: 1406–15.](#)

8  
9 [37 Grunfeld E. Follow-up of breast cancer in primary care vs specialist care: results of an economic evaluation. \*Br J Cancer\* 1999; \*\*79\*\*: 1227–33.](#)

10  
11 [38 Kimman ML, Dirksen CD, Voogd AC, \*et al\*. Economic evaluation of four follow-up strategies after curative treatment for breast cancer: Results of an RCT. \*European Journal of Cancer\* 2011; \*\*47\*\*: 1175–85.](#)

12  
13 [39 Grunfeld E. Randomized Trial of Long-Term Follow-Up for Early-Stage Breast Cancer: A Comparison of Family Physician Versus Specialist Care. \*Journal of Clinical Oncology\* 2006; \*\*24\*\*: 848–55.](#)

14  
15 [40 Editorial. Cancer detection and primary care.....revisited. \*Lancet Oncology\* 2012; \*\*13\*\*: 559.](#)

16  
17 [41 Rubin G, Lyratzopoulos G, Abel G, Neal R, Walter F, Hamilton W. Cancer detection in primary care. \*Lancet Oncology\* 2012; \*\*13\*\*: e325–6.](#)

18  
19 [42 Lyratzopoulos G, Neal R, Barbieri J, Rubin G. Variation in number of general practitioner consultations before hospital referral for cancer: findings from the 2010 National Cancer Patient Experience Survey in England. \*The Lancet Oncology\* 2012; \*\*13\*\*: 353–65.](#)

20  
21 [43 Cooper G, Kou T, Reynolds H. Receipt of guideline-recommended follow-up in older colorectal cancer survivors. \*Cancer\* 2008; \*\*113\*\*: 2029–37.](#)

22  
23 [44 Drummond M, Barbieri M, Cook J, \*et al\*. Transferability of Economic Evaluations Across Jurisdictions: ISPOR Good Research Practices Task Force Report. \*Value in Health\* 2009; \*\*12\*\*: 409–18.](#)

24  
25 [45 Grunfeld E. Routine followup of breastcancer in primary care: randomised trial. \*BMJ\* 1996; : 1–5.](#)

26  
27 [46 Smith RA. Mathematical models and cost-effective screening strategies for colorectal cancer. \*Canadian Medical Association Journal\* 2010; \*\*182\*\*: 1283–4.](#)

28  
29 [1—Larsen IK, editor. Cancer in Norway 2009. \*Cancer Registry of Norway\* 2011: 1–169.](#)

30  
31 [2—Jeffery M. Follow-up strategies for patients treated for non-metastatic colorectal cancer. \*The Cochrane Collaboration\* 2007: 1–31.](#)

32  
33 [3—Tjandra JJ, Chan MKY. Follow-Up After Curative Resection of Colorectal Cancer: A Meta-Analysis. \*Dis Colon Rectum\* 2007; \*\*50\*\*: 1783–99.](#)

34  
35 [4—Figueredo A, Rumble RB, Maroun J, \*et al\*. Follow-up of patients with curatively resected colorectal cancer: a practice guideline. \*BMC Cancer\* 2003; \*\*3\*\*: 26.](#)

36  
37 [5—Scholefield J, editor. Guidelines for the Management of Colorectal Cancer. \*The Association of Coloproctology of Great Britain and Ireland\* 2007; \*\*3\*\*: 1–117.](#)

1  
2  
3  
4  
5  
6  
7  
8  
9  
10  
11  
12  
13  
14  
15  
16  
17  
18  
19  
20  
21  
22  
23  
24  
25  
26  
27  
28  
29  
30  
31  
32  
33  
34  
35  
36  
37  
38  
39  
40  
41  
42  
43  
44  
45  
46  
47  
48  
49  
50  
51  
52  
53  
54  
55  
56  
57  
58  
59  
60

- 6—Bülow S, editor. Retningslinier for diagnostik og behandling af kolorektal cancer (Danish Guidelines). *Danish Colorectal Cancer Group* 2009; **4**: 1–176.
- 7—Vonen B, editor. Nasjonalt handlingsprogram med retningslinjer for diagnostikk, behandling og oppfølging av kreft i tynntarm og endetarm (Norwegian Guidelines). *Norwegian Ministry of Health* 2010: 1–162.
- 8—Engstrom PF, editor. NCCN Clinical Practice Guidelines in Oncology Colon Cancer V.2.2009. *National Comprehensive Cancer network* 2009; **2**: 1–71.
- 9—Follow-Up Study of Patients Who Have Undergone Surgery for Stage I, Stage II, or Stage III Colorectal Cancer. *clinicaltrials.gov*. 2009; : 1–4.
- 10—Grossmann EM, Johnson FE, Virgo KS, Longo WE, Fossati R. Follow-up of colorectal cancer patients after resection with curative intent—the GILDA trial. *Surgical Oncology* 2004; **13**: 119–24.
- 11—Wille-Jørgensen P, Laurberg S, Carriquiry L, *et al*. An interim analysis of recruitment to the COLOFOL trial. *Colorect Dis* 2009; **11**: 756–8.
- 12—Wille-Jørgensen P, Balleby L. Follow-up in colorectal cancer: questions to be answered. *Colorect Dis* 2011; **13**: 959–60.
- 13—Bodenheimer T, Wagner EH, Grumbach K. Improving primary care for patients with chronic illness. *JAMA: The Journal of the American Medical Association* 2002; **288**: 1775–9.
- 14—National Cancer Survivor Initiative. *Department of Health, Macmillan Cancer Support and NHS Improvement, London, UK* 2010: 1–82.
- 15—Augestad KM, Vonen B, Aspevik R, *et al*. Should the surgeon or the general practitioner (GP) follow up patients after surgery for colon cancer? A randomized controlled trial protocol focusing on quality of life, cost-effectiveness and serious clinical events. *BMC Health Serv Res* 2008; **8**: 137.
- 16—Campbell NC. Designing and evaluating complex interventions to improve health care. *BMJ* 2007: 1–5.
- 17—Kawamoto K. Improving clinical practice using clinical decision support systems: a systematic review of trials to identify features critical to success. *BMJ* 2005; **330**: 765–0.
- 18—Sprangers MA, Cull A, Bjordal K, Groenvold M, Aaronson NK. The European Organization for Research and Treatment of Cancer. Approach to quality of life assessment: guidelines for developing questionnaire modules. *EORTC Study Group on Quality of Life. Qual Life Res* 1993; **2**: 287–95.
- 19—Dolan P. Modeling valuations for EuroQol health states. *Med Care* 1997; **35**: 1095–108.
- 20—Dolan P. The Time Trade-off method: Results from a general population study.

1  
2  
3  
4  
5  
6  
7  
8  
9  
10  
11  
12  
13  
14  
15  
16  
17  
18  
19  
20  
21  
22  
23  
24  
25  
26  
27  
28  
29  
30  
31  
32  
33  
34  
35  
36  
37  
38  
39  
40  
41  
42  
43  
44  
45  
46  
47  
48  
49  
50  
51  
52  
53  
54  
55  
56  
57  
58  
59  
60

*Health Economics* 2006; **5**: 1–14.

21—Cambell M. Estimating sample sizes for binary, ordered categorical, and continuous outcomes in two group comparisons. *BMJ* 1995; **311**: 1145–7.

22—King M. The interpretation of scores from the EORTC quality of life questionnaire QLQ-C30. *Quality of Life Research* 2004; **5**: 555–67.

23—Drummond M. Guidelines for authors and peer reviewers of economic submissions to the BMJ. *BMJ* 1996; **313**: 275–83.

24—Hill JC, Whitehurst DGT, Lewis M, *et al*. Comparison of stratified primary care management for low back pain with current best practice (STarT Back): a randomised controlled trial. *Lancet* 2011; **378**: 1560–71.

25—Lachin JM. Futility interim monitoring with control of type I and II error probabilities using the interim Z-value or confidence limit. *Clin Trials* 2009; **6**: 565–73.

26—Lachin JM. A review of methods for futility stopping based on conditional power. *Statist Med* 2005; **24**: 2747–64.

27—Jitlal M, Khan I, Lee SM, Hackshaw A. Stopping clinical trials early for futility: retrospective analysis of several randomised clinical studies. *Br J Cancer* 2012; **107**: 910–7.

28—Wattchow DA, Weller DP, Esterman A, *et al*. General practice vs surgical-based follow-up for patients with colon cancer: randomised controlled trial. *Br J Cancer* 2006; **94**: 1116–21.

29—Renehan AG, O'Dwyer ST, Whynes DK. Cost effectiveness analysis of intensive versus conventional follow up after curative resection for colorectal cancer. *BMJ* 2004; **328**: 1–5.

30—Gall CA, Weller D, Esterman A, *et al*. Patient Satisfaction and Health-Related Quality of Life After Treatment for Colon Cancer. *Dis Colon Rectum* 2007; **50**: 801–9.

31—Beaver K, Hollingworth W, McDonald R, *et al*. Economic evaluation of a randomized clinical trial of hospital versus telephone follow-up after treatment for breast cancer. *Br J Surg* 2009; **96**: 1406–15.

32—Grunfeld E. Follow-up of breast cancer in primary care vs specialist care: results of an economic evaluation. *Br J Cancer* 1999; **79**: 1227–33.

33—Kimman ML, Dirksen CD, Voogd AC, *et al*. Economic evaluation of four follow-up strategies after curative treatment for breast cancer: Results of an RCT. *European Journal of Cancer* 2011; **47**: 1175–85.

34—Grunfeld E. Randomized Trial of Long-Term Follow-Up for Early-Stage Breast Cancer: A Comparison of Family Physician Versus Specialist Care. *Journal of Clinical Oncology* 2006; **24**: 848–55.

- 35—Editorial. Cancer detection and primary care.....revisited. *Lancet Oncology* 2012; **13**: 559.
- 36—Rubin G, Lyratzopoulos G, Abel G, Neal R, Walter F, Hamilton W. Cancer detection in primary care. *Lancet Oncology* 2012; **13**: e325–6.
- 37—Lyratzopoulos G, Neal RD, Barbieri JM, Rubin GP. Variation in number of general practitioner consultations before hospital referral for cancer: findings from the 2010 National Cancer Patient Experience Survey in England. *The Lancet Oncology* 2012; **13**: 353–65.
- 38—Cooper GS, Kou TD, Reynolds H. Receipt of guideline-recommended follow-up in older colorectal cancer survivors. *Cancer* 2008; **113**: 2029–37.
- 39—Drummond M, Barbieri M, Cook J, *et al*. Transferability of Economic Evaluations Across Jurisdictions: ISPOR Good Research Practices Task Force Report. *Value in Health* 2009; **12**: 409–18.
- 40—Grunfeld E. Routine followup of breastcancer in primary care: randomised trial. *BMJ* 1996; : 1–5.
- 41—Smith RA. Mathematical models and cost-effective screening strategies for colorectal cancer. *Canadian Medical Association Journal* 2010; **182**: 1283–4.

### Figure legends:

#### **Figure 1.** Participating trial hospitals and communities.

Three hospital trusts and the University Hospital of North Norway trust are located within the Northern-Norwegian Health Region, serving a population of 470 000. Median travel time with car from primary care communities to hospital were 2 hours. Two patients were randomised to follow up at their GP located in Longyear City, Spitsbergen (not shown on map), 2 hours flight from the university hospital.

#### **Figure 21.** Flow of participants.

Patients were enrolled in the 2007 NGICG (Norwegian Gastrointestinal Cancer Group, table 1) follow-up program in both trial arms. The program are divided in 3 months cycles i.e.; clinical examination at 1 (baseline), 3,6,9,12,15,18,21 and 24 months, carcinoembryonic antigen (CEA) measurement at 3 months intervals, chest x-ray and contrast enhanced liver ultrasound every 6 months, and colonoscopy 1 time during 24 months (table 1).

1  
2  
3  
4  
5  
6  
7  
8 **Figure 3-2 A, B, C.** Health related quality of life 1-24 postoperative month.  
9 EORTC QLQ C30 Global Health, EQ-5D index score and EQ-5D visual analog scale.

10  
11  
12 **Figure 43.** Cost of follow-up per cycle.

13 Mean health care cost of follow-up per patient per 3 month follow-up cycle with error bars (95%  
14 confidence intervals). In a general linear model, mean difference between groups was 60.0 £ (95 CI  
15 interval: 7.0 – 113.0, p = 0.02).

16  
17  
18  
19 **Figure 54.** Sensitivity analyses of cost driving elements in surveillance.

20 Societal cost per patient (£) for 24-month colon cancer follow-up. Most critical variable in terms of impact  
21 is listed at the top of the graph, and the rest ranked according to their impact thereafter. As unit cost from  
22 the UK, like cost for GP consultation and diagnostic testing, has been reported to be 30-40% higher than  
23 units cost applied in this trial, relevant cost elements were increased accordingly. Cost values for serious  
24 clinical events, metastases surgeries and sick leave were adjusted for baseline characteristics.  
25  
26  
27  
28  
29  
30  
31  
32  
33  
34  
35  
36  
37  
38  
39  
40  
41  
42  
43  
44  
45  
46  
47  
48  
49  
50  
51  
52  
53  
54  
55  
56  
57  
58  
59  
60
